# Supplementary material for: On the Origin of Tibetans and Their Genetic Basis in Adapting High-Altitude Environments
Source: PLoS One. 2011 Feb 28;6(2):e17002. doi: 10.1371/journal.pone.0017002 (PMC3046130; doi:10.1371/journal.pone.0017002)
Supplement: Table S3 — 200-kb genomic regions identified in the top five percent of the XP-EHH and iHS tests. (XLS) [file pone.0017002.s008.xls]

## Sheet: Title
Table S3. 200-kb genomic regions identified in the top five percent of the iHS and XP-EHH tests

## Sheet: XP-EHH;TIB-CHB
chromosome	start	end	statistics	snp.count	bin.lab	P value	-log10(P value)	genes
1	229742429	229942429	7.15684	80	5	0.000320616	3.49402	TSNAX,DISC1
1	229342429	229542429	6.83882	87	5	0.000641231	3.19299	TRIM67,FLJ30430,C1orf131,GNPAT,EXOC8,C1orf124
2	61614445	61814445	6.63748	42	3	0.000361011	3.44248	XPO1,LOC647077,FLJ13305
8	36362939	36562939	6.38895	37	2	0.00250627	2.60097	KCNU1,FKSG2
7	70952743	71152743	6.19262	60	4	0.000234962	3.629	CALN1,LOC728453
16	78224045	78424045	6.18028	63	4	0.000469925	3.32797	MAF,LOC440389
2	58814445	59014445	6.1138	77	4	0.000704887	3.15188	hCG_15200,LOC730134,FANCL
2	61414445	61614445	5.66225	53	3	0.000722022	3.14145	USP34,LOC647074,XPO1
8	36162939	36362939	5.62409	40	3	0.00108303	2.96536	UNC5D,KCNU1,FKSG2
5	162911298	163111298	5.4989	60	4	0.00093985	3.02694	MAT2B,LOC391844
8	35962939	36162939	5.33249	37	2	0.00501253	2.29994	UNC5D
2	28614445	28814445	5.26493	72	4	0.00117481	2.93003	PLB1,PPP1CB
2	46414445	46614445	5.25604	104	6	0.00074184	3.12969	EPAS1,LOC388946,ATP6V1E2,RHOQ
2	104414445	104614445	5.17	49	3	0.00144404	2.84042	LOC284998,MRPS9
12	9063251	9263251	5.16607	90	5	0.000961847	3.01689	KLRG1,LOC643996,C12orf33,A2M,PZP
17	68019389	68219389	5.01036	90	5	0.00128246	2.89196	SLC39A11
1	110942429	111142429	4.95666	86	5	0.00160308	2.79505	KCNA2,LOC728161,KCNA3,CD53,LOC643232
12	9263251	9463251	4.8793	72	4	0.00140977	2.85085	PZP,LOC642846,LOC728704,LOC728715,LOC728719
1	46342429	46542429	4.83721	77	4	0.00164474	2.7839	PIK3R3,TSPAN1,POMGNT1,C1orf190,RAD54L,LRRC41
20	56011244	56211244	4.64663	77	4	0.0018797	2.72591	C20orf85,C20orf86
1	196542429	196742429	4.62737	64	4	0.00211466	2.67476	NEK7,ATP6V1G3
16	78424045	78624045	4.62681	114	6	0.00148368	2.82866	LOC440389,LOC729847
10	101688481	101888481	4.60186	47	3	0.00180505	2.74351	DNMBP,CPN1,LOC644566
6	32526089	32726089	4.57721	97	5	0.00192369	2.71586	HLA-DRA,HLA-DRB5,HLA-DRB6,HLA-DRB1,HLA-DQA1
18	65015890	65215890	4.57635	86	5	0.00224431	2.64892	CCDC102B,DOK6
12	48463251	48663251	4.53603	92	5	0.00256492	2.59093	LOC283331,KIAA1602,BCDIN3D,FAIM2,AQP2,AQP5,AQP6
19	34617034	34817034	4.52325	44	3	0.00216606	2.66433	LOC284395,POP4,VSTM2B,LOC727974
5	102911298	103111298	4.50512	29	2	0.0075188	2.12385	NUDT12
10	100288481	100488481	4.49938	71	4	0.00234962	2.629	HPSE2
8	137162939	137362939	4.45729	62	4	0.00258459	2.58761	KHDRBS3
15	38843224	39043224	4.36201	34	2	0.0100251	1.99891	GCHFR,LOC643338,DNAJC17,ZFYVE19,PPP1R14D,SPINT1,RHOV,VPS18,DLL4,CHAC1
11	26588510	26788510	4.35196	127	7	0.00220264	2.65706	TMEM16C,SLC5A12
13	42195297	42395297	4.32738	102	6	0.00222552	2.65257	C13orf30,EPSTI1
14	90336664	90536664	4.32226	66	4	0.00281955	2.54982	TTC7B,RPS6KA5
2	61214445	61414445	4.31878	65	4	0.00305451	2.51506	KIAA1841,LOC339804,AHSA2,USP34
5	111111298	111311298	4.29224	66	4	0.00328947	2.48287	C5orf13
12	113463251	113663251	4.28983	66	4	0.00352444	2.45291	TBX3
7	71152743	71352743	4.27201	50	3	0.00252708	2.59738	CALN1
9	87244551	87444551	4.25902	74	4	0.0037594	2.42488	AGTPBP1
1	196742429	196942429	4.25549	66	4	0.00399436	2.39855	ATP6V1G3,PTPRC
13	102995297	103195297	4.1967	86	5	0.00288554	2.53977	LOC728183
1	85742429	85942429	4.18485	84	5	0.00320616	2.49402	DDAH1,CYR61,C1orf181
10	113488481	113688481	4.14857	72	4	0.00422932	2.37373	GPAM
20	1011244	1211244	4.1242	93	5	0.00352677	2.45262	PSMF1,C20orf46,LOC400831,LOC642636,SNPH
3	181036044	181236044	4.10927	54	3	0.00288809	2.53939	PEX5L
17	47019389	47219389	4.09342	45	3	0.0032491	2.48824	CA10
13	70195297	70395297	4.07633	42	3	0.00361011	2.44248	LOC647277
7	82552743	82752743	4.07464	67	4	0.00446429	2.35025	PCLO,SEMA3E
15	38643224	38843224	4.05701	64	4	0.00469925	2.32797	CCDC32,RPUSD2,CASC5,LOC729029,RAD51,FAM82C
3	120636044	120836044	4.05118	95	5	0.00384739	2.41483	TMEM39A,KTELC1,C3orf1,CD80,ADPRH,PLA1A,LOC442086
1	196142429	196342429	4.04787	69	4	0.00493421	2.30678	LHX9,LOC647195
9	71044551	71244551	4.04444	93	5	0.004168	2.38007	TJP2,C9orf61,APBA1
15	38443224	38643224	4.03948	73	4	0.00516917	2.28658	DISP2,C15orf23,IVD,BAHD1,CHST14,MRPL42P5,CCDC32
6	136126089	136326089	4.03221	79	4	0.00540414	2.26727	PDE7B
5	8511298	8711298	3.99976	67	4	0.0056391	2.24879	LOC729506,SEMA5A
10	100488481	100688481	3.99959	49	3	0.00397112	2.40109	HPSE2
12	42263251	42463251	3.98457	87	5	0.00448862	2.34789	LOC400026,LOC401717,ADAMTS20,PUS7L,IRAK4
2	46214445	46414445	3.98387	119	6	0.00296736	2.52763	PRKCE,EPAS1
12	42463251	42663251	3.9597	63	4	0.00587406	2.23106	IRAK4,TWF1,TMEM117
14	78136664	78336664	3.95477	82	5	0.00480923	2.31792	NRXN3
2	227814445	228014445	3.95394	81	5	0.00512985	2.2899	COL4A3,C2orf33,TM4SF20,HRB
11	5188510	5388510	3.94788	165	9	0.0135135	1.86923	OR51V1,HBB,HBD,HBBP1,HBG1,HBG2,HBE1,OR51B4,OR51B2,OR51B5,OR51B6,LOC643745,LOC643753,OR51M1
8	129162939	129362939	3.94575	111	6	0.0037092	2.43072	TMEM75,MYC
3	114236044	114436044	3.93796	101	6	0.00445104	2.35154	C3orf17,BOC
17	74819389	75019389	3.92928	96	5	0.00545046	2.26357	HRNBP3
10	30288481	30488481	3.92775	97	5	0.00577108	2.23874	KIAA1462,LOC729663
1	92142429	92342429	3.91911	83	5	0.0060917	2.21526	TGFBR3,BRDT,ABHD7,LOC646817,BTBD8
10	119288481	119488481	3.90874	122	7	0.00440529	2.35603	EMX2,EMX2OS
18	33615890	33815890	3.89963	40	3	0.00433213	2.3633	BRUNOL4
19	62217034	62417034	3.89955	77	4	0.00610902	2.21403	USP29,ZIM3,DUXA,ZNF264
12	27863251	28063251	3.89806	64	4	0.00634398	2.19764	KLHDC5,PTHLH
17	34019389	34219389	3.894	71	4	0.00657895	2.18184	SNIP,MLLT6,PCGF2,PSMB3,PIP4K2B,CCDC49
8	23162939	23362939	3.89041	116	6	0.00519288	2.28459	CHMP7,R3HCC1,LOXL2,ENTPD4
7	78152743	78352743	3.88521	80	5	0.00641231	2.19299	MAGI2
1	169142429	169342429	3.85492	86	5	0.00673293	2.1718	C1orf129,LOC646804,FMO3
10	101088481	101288481	3.83512	89	5	0.00705354	2.15159	CNNM1,GOT1,NKX2-3
21	37687640	37887640	3.82697	60	4	0.00681391	2.1666	DYRK1A,KCNJ6
3	89036044	89236044	3.82573	49	3	0.00469314	2.32854	LOC728432,EPHA3
17	75419389	75619389	3.80897	84	5	0.00737416	2.13229	CBX4,TBC1D16
5	111311298	111511298	3.8033	68	4	0.00704887	2.15188	C5orf13,C5orf26,EPB41L4A
1	229542429	229742429	3.80045	60	4	0.00728383	2.13764	C1orf124,EGLN1,LOC645339,TSNAX,LOC440731
12	20863251	21063251	3.7941	141	8	0.00606061	2.21748	SLCO1B3,LST-3TM12
21	35687640	35887640	3.78652	60	4	0.0075188	2.12385	RUNX1,SETD4
17	28219389	28419389	3.78598	99	5	0.00769477	2.1138	MYO1D,TMEM98,SPACA3,ACCN1
3	88836044	89036044	3.78321	53	3	0.00505415	2.29635	LOC728432,EPHA3
2	121614445	121814445	3.77594	89	5	0.00801539	2.09608	TFCP2L1,CLASP1
2	20414445	20614445	3.76211	109	6	0.00593472	2.2266	PUM2,LOC729606,RHOB,hCG_1795065
14	67736664	67936664	3.73463	63	4	0.00775376	2.11049	RAD51L1
1	46542429	46742429	3.73165	75	4	0.00798872	2.09752	UQCRH,NSUN4,FAAH,LOC729037,LOC644941,LOC729041,DMBX1
14	43536664	43736664	3.72566	93	5	0.00833601	2.07904	LOC645086,C14orf28
5	53111298	53311298	3.70144	77	4	0.00822368	2.08493	NDUFS4,ARL15
1	55142429	55342429	3.68628	195	10	0.027027	1.5682	DHCR24,TMEM61,BSND,PCSK9,USP24
12	12063251	12263251	3.68455	114	6	0.00667656	2.17545	BCL2L14,LOC643287,LRP6
17	39819389	40019389	3.67883	76	4	0.00845865	2.0727	ITGA2B,GPATCH8,FZD2
9	70444551	70644551	3.67622	85	5	0.00865662	2.06265	LOC347097,PIP5K1B,FAM122A
1	229942429	230142429	3.67195	92	5	0.00897724	2.04686	DISC1,DISC2
11	78188510	78388510	3.66902	75	4	0.00869361	2.0608	ODZ4,LOC729746
15	49443224	49643224	3.66849	72	4	0.00892857	2.04922	GLDN,DMXL2
22	45235160	45435160	3.65865	88	5	0.00929785	2.03162	CELSR1,LOC728077,DIP,GRAMD4
14	43336664	43536664	3.65667	65	4	0.00916353	2.03794	LOC390472,LOC645086,C14orf28
9	114044551	114244551	3.64938	53	3	0.00541516	2.26639	ROD1,LOC644996,HSDL2
5	102711298	102911298	3.6232	55	3	0.00577617	2.23836	C5orf30,NUDT12
4	12061566	12261566	3.61786	72	4	0.0093985	2.02694	LOC644753,HSP90AB2P,RAB28
5	72111298	72311298	3.61047	69	4	0.00963346	2.01622	TNPO1,FCHO2
16	81424045	81624045	3.60254	139	7	0.00660793	2.17993	CDH13
11	119188510	119388510	3.59468	90	5	0.00961847	2.01689	LOC390255,TRIM29
7	70552743	70752743	3.58131	67	4	0.00986842	2.00575	WBSCR17
16	49224045	49424045	3.58114	74	4	0.0101034	1.99553	NKD1,SLIC1,NOD2,CYLD,LOC727992
3	120436044	120636044	3.57764	81	5	0.00993908	2.00265	B4GALT4,CDGAP,TMEM39A
2	214414445	214614445	3.57655	57	3	0.00613718	2.21203	SPAG16
17	64019389	64219389	3.57351	76	4	0.0103383	1.98555	PRKAR1A,FAM20A
2	53014445	53214445	3.56788	83	5	0.0102597	1.98887	ASB3
3	169636044	169836044	3.56339	63	4	0.0105733	1.97579	LOC389174,LOC647158
4	98461566	98661566	3.55828	40	3	0.00649819	2.18721	C4orf37
19	53217034	53417034	3.55585	122	7	0.00881057	2.055	ELSPBP1,CABP5,PLA2G4C,LIG1,LOC374920,CARD8
5	134311298	134511298	3.55395	73	4	0.0108083	1.96624	PCBD2,CATSPER3,PITX1,LOC389328
2	19614445	19814445	3.55094	105	6	0.0074184	2.12969	OSR1,TTC32
3	141236044	141436044	3.545	87	5	0.0105803	1.9755	CLSTN2
19	34817034	35017034	3.5443	80	5	0.0109009	1.96254	LOC727974,POP4,PLEKHF1,C19orf12,CCNE1
13	43595297	43795297	3.54204	100	6	0.00816024	2.0883	LOC121838,SERP2
12	1463251	1663251	3.54151	121	7	0.0110132	1.95809	ERC1,FBXL14,WNT5B,ADIPOR2
2	29814445	30014445	3.53846	100	6	0.00890208	2.05051	ALK
15	76643224	76843224	3.52649	37	2	0.0125313	1.902	CHRNA5,CHRNA3,CHRNB4,LOC390612,LOC646934,LOC646938,ADAMTS7
1	179742429	179942429	3.52644	73	4	0.0110432	1.9569	CACNA1E
1	112542429	112742429	3.52367	74	4	0.0112782	1.94776	CTTNBP2NL
7	126352743	126552743	3.52227	71	4	0.0115132	1.93881	GRM8
7	37152743	37352743	3.51567	100	6	0.00964392	2.01575	ELMO1
11	115388510	115588510	3.51224	41	3	0.00685921	2.16373	LOC728842,BUD13
10	100688481	100888481	3.51085	52	3	0.00722022	2.14145	HPSE2
5	111511298	111711298	3.50983	96	5	0.0112215	1.94995	C5orf26,SNORA13,EPB41L4A
20	56611244	56811244	3.50385	101	6	0.0103858	1.98356	MGC4294,STX16,NPEPL1,LOC391258,NESPAS
8	65562939	65762939	3.49824	99	5	0.0115422	1.93771	BHLHB5,CYP7B1
3	141436044	141636044	3.49275	98	5	0.0118628	1.92581	CLSTN2
21	41487640	41687640	3.49003	114	6	0.0111276	1.9536	PLAC4,BACE2,FAM3B,MX2
10	123888481	124088481	3.48424	136	7	0.0132159	1.8789	TACC2,BTBD16
7	98752743	98952743	3.4797	86	5	0.0121834	1.91423	ARPC1A,ARPC1B,PDAP1,BUD31,PTCD1,CPSF4,ATP5J2,ZNF789,ZNF394,ZKSCAN5
13	43795297	43995297	3.47075	87	5	0.012504	1.90295	SERP2,TSC22D1
8	35562939	35762939	3.47017	55	3	0.00758123	2.12026	UNC5D
1	215942429	216142429	3.46642	69	4	0.0117481	1.93003	SPATA17
11	14188510	14388510	3.46071	81	5	0.0128246	1.89196	SPON1,RRAS2,LOC401676
22	18035160	18235160	3.45787	129	7	0.0154185	1.81196	5-Sep,39696,GP1BB,TBX1,GNB1L,LOC728139,C22orf29,TXNRD2
7	98552743	98752743	3.45264	57	3	0.00794224	2.10006	SMURF1,KPNA7,MYH16
1	183142429	183342429	3.45203	71	4	0.0119831	1.92143	FAM129A,RNF2
3	88436044	88636044	3.45137	61	4	0.012218	1.913	LOC344653
7	35152743	35352743	3.44658	42	3	0.00830325	2.08075	LOC646869,TBX20
14	45736664	45936664	3.4351	58	3	0.00866426	2.06227	RPL10L,MDGA2
5	71311298	71511298	3.43361	66	4	0.012453	1.90473	MAP1B
10	103888481	104088481	3.42633	95	5	0.0131452	1.88123	PPRC1,NOLC1,ELOVL3,PITX3,GBF1
20	54411244	54611244	3.42191	95	5	0.0134659	1.87077	CSTF1,C20orf32,C20orf43,C20orf106,C20orf107,TFAP2C
10	104088481	104288481	3.41994	92	5	0.0137865	1.86055	GBF1,NFKB2,PSD,FBXL15,CUEDC2,C10orf95,TMEM180,ACTR1A,SUFU
15	93443224	93643224	3.41305	77	4	0.012688	1.89661	LOC400456
15	60243224	60443224	3.41217	79	4	0.0129229	1.88864	FAM148B,FLJ38723
20	17011244	17211244	3.40972	84	5	0.0141071	1.85056	PCSK2
10	30088481	30288481	3.39695	110	6	0.0118694	1.92557	SVIL,KIAA1462
1	91942429	92142429	3.39235	120	7	0.0176211	1.75397	TGFBR3
20	42211244	42411244	3.38607	81	5	0.0144277	1.8408	JPH2,C20orf111,GDAP1L1,C20orf142,LOC728273,R3HDML
4	177461566	177661566	3.38575	88	5	0.0147483	1.83126	SPCS3
16	74824045	75024045	3.3824	90	5	0.0150689	1.82192	CNTNAP4,LOC441775
14	49736664	49936664	3.37989	87	5	0.0153895	1.81277	SOS2,L2HGDH,ATP5S,CDKL1
2	167414445	167614445	3.37666	49	3	0.00902527	2.04454	XIRP2
1	111142429	111342429	3.37439	76	4	0.0131579	1.88081	LOC643232,CD53,C1orf103
14	68336664	68536664	3.37107	102	6	0.0126113	1.89924	C14orf181,ZFP36L1,ACTN1
10	122888481	123088481	3.36577	82	5	0.0157102	1.80382	LOC646255,FGFR2
8	28162939	28362939	3.36034	92	5	0.0160308	1.79505	LOC389644,PNOC,ZNF395,FBXO16
1	179542429	179742429	3.35602	81	5	0.0163514	1.78645	CACNA1E,LOC647041
3	121836044	122036044	3.35066	66	4	0.0133929	1.87313	HGD,LOC727722,RABL3,GTF2E1
6	133526089	133726089	3.34954	85	5	0.016672	1.77801	LOC285735,EYA4
16	27824045	28024045	3.34624	72	4	0.0136278	1.86557	GSG1L,XPO6
8	99162939	99362939	3.34589	108	6	0.0133531	1.87442	C8orf47,HRSP12,POP1,NPAL2
2	64814445	65014445	3.34442	88	5	0.0169926	1.76974	LOC730187,SERTAD2,LOC400958
12	11663251	11863251	3.3392	98	5	0.0173132	1.76162	ETV6
9	14444551	14644551	3.33622	142	8	0.0121212	1.91645	NFIB,ZDHHC21
1	65942429	66142429	3.33436	92	5	0.0176339	1.75365	LEPR,PDE4B
6	90726089	90926089	3.3291	80	5	0.0179545	1.74583	BACH2
10	100888481	101088481	3.32765	51	3	0.00938628	2.02751	HPSE2,CNNM1
9	87444551	87644551	3.32514	36	2	0.0150376	1.82282	AGTPBP1
1	6942429	7142429	3.32068	89	5	0.0182751	1.73814	CAMTA1
15	93243224	93443224	3.32021	70	4	0.0138628	1.85815	LOC440311,LOC400456
2	161414445	161614445	3.31903	75	4	0.0140977	1.85085	TANK
6	15326089	15526089	3.30851	58	3	0.00974729	2.01112	JARID2
4	98661566	98861566	3.30805	48	3	0.0101083	1.99532	C4orf37
17	18819389	19019389	3.30355	39	2	0.0175439	1.75587	FAM83G,SLC5A10,GRAP,LOC400581,EPN2
4	18661566	18861566	3.29742	45	3	0.0104693	1.98008	LOC729071,LCORL,SLIT2
18	72815890	73015890	3.29724	114	6	0.014095	1.85094	MBP
10	55488481	55688481	3.29326	94	5	0.0185957	1.73059	PCDH15
19	62417034	62617034	3.28984	104	6	0.0148368	1.82866	ZNF264,AURKC,ZNF805,ZNF460,ZNF543,ZNF304,ZNF547,ZNF548,ZNF17
1	71942429	72142429	3.28334	51	3	0.0108303	1.96536	NEGR1
21	35487640	35687640	3.28065	79	4	0.0143327	1.84367	RUNX1
1	72142429	72342429	3.27952	74	4	0.0145677	1.83661	NEGR1
10	111088481	111288481	3.27758	49	3	0.0111913	1.95112	LOC645318,XPNPEP1
7	98952743	99152743	3.27429	110	6	0.0155786	1.80747	ZKSCAN5,C7orf38,ZNF655,ZNF498,CYP3A5,CYP3A7
9	10044551	10244551	3.27414	98	5	0.0189163	1.72316	LOC729802
2	61014445	61214445	3.26872	92	5	0.0192369	1.71586	LOC344423,PUS10,PEX13,KIAA1841
5	19911298	20111298	3.26408	81	5	0.0195576	1.70869	CDH18
8	15562939	15762939	3.26373	174	9	0.027027	1.5682	TUSC3,hCG_1794003
1	25142429	25342429	3.26083	103	6	0.0163205	1.78727	RUNX3,LOC391020
2	166014445	166214445	3.26002	37	2	0.0200501	1.69788	SCN2A,FAM130A2
16	79224045	79424045	3.24615	76	4	0.0148026	1.82966	CDYL2
2	26414445	26614445	3.24369	97	5	0.0198782	1.70162	SELI,C2orf39,OTOF
17	71019389	71219389	3.24326	114	6	0.0170623	1.76796	CASKIN2,LOC728261,TSEN54,LLGL2,MYO15B,NULL,RECQL5,LOC643008,SAP30BP
4	174461566	174661566	3.23877	54	3	0.0115523	1.93733	GALNT7,LOC727929,HMGB2,SAP30,SCRG1,HAND2
12	13063251	13263251	3.23234	85	5	0.0201988	1.69467	HTR7P,KIAA1467,GSG1,EMP1
5	20111298	20311298	3.23011	36	2	0.0225564	1.64673	CDH18
12	17063251	17263251	3.22982	22	2	0.0250627	1.60097	LOC387845,LMO3,LOC390297
21	37887640	38087640	3.22626	90	5	0.0205194	1.68784	KCNJ6
19	43417034	43617034	3.22601	103	6	0.0178042	1.74948	DPF1,PPP1R14A,SPINT2,LOC541469,C19orf33,YIF1B,KCNK6,C19orf15,PSMD8,GGN,SPRED3,FAM98C,RASGRP4,RYR1
7	110152743	110352743	3.21807	69	4	0.0150376	1.82282	IMMP2L
7	82752743	82952743	3.21749	86	5	0.02084	1.6811	SEMA3E
10	91488481	91688481	3.21002	80	5	0.0211606	1.67447	MPHOSPH1,hCG_2024094,LOC119358
14	81336664	81536664	3.20801	66	4	0.0152726	1.81609	LOC730103,SEL1L
2	80014445	80214445	3.20383	139	7	0.0198238	1.70281	CTNNA2,LRRTM1
12	104663251	104863251	3.20286	85	5	0.0214812	1.66794	NUAK1
14	46936664	47136664	3.20025	68	4	0.0155075	1.80946	MDGA2,LOC729295
7	145952743	146152743	3.19246	56	3	0.0119134	1.92397	CNTNAP2
21	42887640	43087640	3.19112	109	6	0.018546	1.73175	SLC37A1,PDE9A
7	107952743	108152743	3.19069	31	2	0.0275689	1.55958	PNPLA8,THAP5,DNAJB9
2	205614445	205814445	3.18853	92	5	0.0218019	1.66151	PARD3B
12	104863251	105063251	3.1874	102	6	0.0192878	1.71472	NUAK1,NULL
17	11219389	11419389	3.18494	65	4	0.0157425	1.80293	FLJ45455
11	110788510	110988510	3.18371	64	4	0.0159774	1.79649	LOC644277,BTG4,LOC728196,FLJ46266,LAYN,SNF1LK2
5	87911298	88111298	3.18134	21	2	0.0300752	1.52179	LOC645323,MEF2C
5	164711298	164911298	3.18027	67	4	0.0162124	1.79015	LOC728843,MAT2B
2	49214445	49414445	3.18026	74	4	0.0164474	1.7839	FSHR
1	68342429	68542429	3.17806	146	8	0.0181818	1.74036	GPR177,LOC645291,LOC149224
4	96261566	96461566	3.17769	90	5	0.0221225	1.65517	BMPR1B,UNC5C
9	7044551	7244551	3.17744	147	8	0.0242424	1.61542	JMJD2C
5	71911298	72111298	3.17737	25	2	0.0325815	1.48703	LOC389300,ZNF366,LOC728620,TNPO1
20	56811244	57011244	3.17704	70	4	0.0166823	1.77774	NESPAS,NPEPL1,GNAS,TH1L,CTSZ
20	43011244	43211244	3.17525	75	4	0.0169173	1.77167	TOMM34,STK4,KCNS1,WFDC5,WFDC12
1	29142429	29342429	3.16778	83	5	0.0224431	1.64892	EPB41,TMEM200B,SFRS4
1	160942429	161142429	3.16697	95	5	0.0227637	1.64276	DDR2,HSD17B7,C1orf110
1	44142429	44342429	3.16564	90	5	0.0230843	1.63668	ST3GAL3,ARTN,IPO13,DPH2,ATP6V0B,B4GALT2,CCDC24,SLC6A9,LOC644743
4	44261566	44461566	3.16418	66	4	0.0171523	1.76568	YIPF7,GUF1,GNPDA2
7	137152743	137352743	3.16171	81	5	0.0234049	1.63069	DGKI,CREB3L2
13	113195297	113395297	3.16023	71	4	0.0173872	1.75977	TMCO3,TFDP1,ATP4B,GRK1
2	203814445	204014445	3.15813	88	5	0.0237256	1.62478	CYP20A1,ABI2,RAPH1
6	9526089	9726089	3.1516	77	4	0.0176222	1.75394	OFCC1
2	47214445	47414445	3.15091	81	5	0.0240462	1.61895	C2orf61,CALM2,BCYRN1,TACSTD1
8	54962939	55162939	3.14884	68	4	0.0178571	1.74819	RGS20,TCEA1,LYPLA1
1	160142429	160342429	3.14765	95	5	0.0243668	1.6132	ATF6,OLFML2B,NOS1AP
2	204014445	204214445	3.14523	79	4	0.0180921	1.74251	RAPH1,LOC729532,CD28
7	99152743	99352743	3.13174	110	6	0.0200297	1.69833	CYP3A7,CYP3A4,CYP3A43,OR2AE1,TRIM4
5	20511298	20711298	3.13129	62	4	0.0183271	1.73691	CDH18
5	6511298	6711298	3.12295	122	7	0.0220264	1.65706	FLJ25076,NSUN2,SRD5A1
9	25444551	25644551	3.11426	108	6	0.0207715	1.68253	TUSC1
4	102861566	103061566	3.11352	76	4	0.018562	1.73137	BANK1
16	77024045	77224045	3.11331	152	8	0.030303	1.51851	WWOX,LOC645957
1	213942429	214142429	3.09935	129	7	0.0242291	1.61566	USH2A
20	57011244	57211244	3.0989	34	2	0.0350877	1.45484	CTSZ,LOC729181,TUBB1,ATP5E,SLMO2,C20orf174
19	55417034	55617034	3.09421	104	6	0.0215134	1.66729	MYH14,KCNC3,NAPSB,NAPSA,NR1H2,POLD1,SPIB
5	133911298	134111298	3.09163	64	4	0.018797	1.72591	PHF15,SAR1B,SEC24A,CAMLG
9	9844551	10044551	3.09083	107	6	0.0222552	1.65257	LOC729802,PTPRD
6	13326089	13526089	3.08991	113	6	0.022997	1.63833	PHACTR1,TBC1D7,GFOD1
8	69362939	69562939	3.08856	67	4	0.019032	1.72052	DEPDC2,C8orf34
7	129752743	129952743	3.08614	108	6	0.0237389	1.62454	CPA4,CPA5,CPA1,TSGA14,MEST,COPG2
8	15162939	15362939	3.08539	135	7	0.0264317	1.57787	SGCZ,TUSC3
9	115244551	115444551	3.08498	63	4	0.0192669	1.71519	C9orf43,RGS3
11	118988510	119188510	3.08487	73	4	0.0195019	1.70992	NULL,PVRL1,LOC390255
17	64219389	64419389	3.0844	105	6	0.0244807	1.61118	FAM20A,ABCA8
22	45035160	45235160	3.07846	87	5	0.0246874	1.60752	PKDREJ,FLJ20699,GTSE1,TRMU,CELSR1
10	51688481	51888481	3.0765	101	6	0.0252226	1.59821	LOC728532,ASAH2,SGMS1
18	60815890	61015890	3.07374	43	3	0.0122744	1.911	CDH7
4	94261566	94461566	3.07338	49	3	0.0126354	1.89841	GRID2
8	23362939	23562939	3.07239	106	6	0.0259644	1.58562	ENTPD4,SLC25A37,LOC646721
21	41687640	41887640	3.07204	99	5	0.025008	1.60192	MX2,MX1,TMPRSS2
5	20911298	21111298	3.0659	45	3	0.0129964	1.88618	LOC728411,CDH12
3	5436044	5636044	3.06451	90	5	0.0253286	1.59639	EDEM1
17	1819389	2019389	3.06425	85	5	0.0256492	1.59093	RTN4RL1,DPH1-OVCA2,DPH1,OVCA2,LOC727986,HIC1,SMG6
12	98463251	98663251	3.06099	62	4	0.0197368	1.70472	ANKS1B,FAM71C
21	37487640	37687640	3.06032	68	4	0.0199718	1.69958	TTC3,DSCR9,DSCR3,DYRK1A
6	40326089	40526089	3.05878	102	6	0.0267062	1.57339	FLJ41649,LRFN2
6	3126089	3326089	3.05762	97	5	0.0259699	1.58553	TUBB2A,TUBB2B,C6orf86,SLC22A23,C6orf85
2	16614445	16814445	3.05647	86	5	0.0262905	1.5802	FAM49A
15	92443224	92643224	3.0549	88	5	0.0266111	1.57494	LOC400455,MCTP2
20	52811244	53011244	3.05464	84	5	0.0269317	1.56974	DOK5
9	106044551	106244551	3.05388	56	3	0.0133574	1.87428	LOC347281,SMC2,OR13F1
2	239814445	240014445	3.0525	66	4	0.0202068	1.6945	HDAC4,NULL
16	49024045	49224045	3.04841	47	3	0.0137184	1.8627	BRD7,NKD1
2	28414445	28614445	3.04482	83	5	0.0272523	1.5646	BRE,FOSL2,PLB1
4	169461566	169661566	3.04462	100	6	0.0274481	1.56149	DDX60,DDX60L,PALLD
13	109795297	109995297	3.04071	155	8	0.0363636	1.43933	COL4A2,RAB20
7	110952743	111152743	3.04033	59	3	0.0140794	1.85142	IMMP2L,DOCK4
10	16688481	16888481	3.03574	104	6	0.0281899	1.54991	RSU1
3	157636044	157836044	3.03418	110	6	0.0289318	1.53863	KCNAB1,SSR3,LOC653801
7	146152743	146352743	3.02902	72	4	0.0204417	1.68948	CNTNAP2
20	32611244	32811244	3.02518	103	6	0.0296736	1.52763	MAP1LC3A,PIGU,TP53INP2,NCOA6
19	54417034	54617034	3.02347	79	4	0.0206767	1.68452	TRPM4,SLC6A16,CD37,TEAD2,DKKL1,FLJ32658,PTH2
3	22036044	22236044	3.0228	114	6	0.0304154	1.51691	ZNF385D,LOC728516
5	79511298	79711298	3.02137	91	5	0.0275729	1.55952	SERINC5,KRT18P45,LOC644936,SPZ1,LOC391804,LOC441089,LOC644037
5	20311298	20511298	3.0207	57	3	0.0144404	1.84042	CDH18
12	96063251	96263251	3.01994	41	3	0.0148014	1.8297	NEDD1,LOC643711
19	40217034	40417034	3.01704	105	6	0.0311573	1.50644	SCN1B,HPN,LOC728630,FXYD3,LGI4,FXYD1,FXYD7,FXYD5,TMEM162,LOC643951
7	82152743	82352743	3.01342	70	4	0.0209117	1.67961	PCLO
9	71244551	71444551	3.01281	81	5	0.0278936	1.5545	APBA1
1	216342429	216542429	3.01223	78	4	0.0211466	1.67476	RRP15
6	15526089	15726089	3.00534	87	5	0.0282142	1.54953	JARID2,DTNBP1
9	70244551	70444551	3.00215	30	2	0.037594	1.42488	PGM5,C9orf71,LOC347097
9	115444551	115644551	2.99855	86	5	0.0285348	1.54463	RGS3,ZNF618
2	176614445	176814445	2.99799	102	6	0.0318991	1.49622	EVX2,HOXD13,HOXD12,HOXD11,HOXD10,LOC728839,HOXD9,HOXD8,LOC401021,HOXD4,HOXD3,HOXD1,LOC129841
7	108152743	108352743	2.99598	50	3	0.0151625	1.81923	LOC154907
15	23643224	23843224	2.99526	124	7	0.0286344	1.54311	ATP10A
5	167311298	167511298	2.99467	105	6	0.0326409	1.48624	ODZ2
19	48817034	49017034	2.99012	136	7	0.030837	1.51093	CADM4,PLAUR,IRGC,C19orf61,KCNN4,LYPD5
7	129952743	130152743	2.98928	64	4	0.0213816	1.66996	COPG2,TSGA13,KLF14,LOC646329
2	52814445	53014445	2.98585	80	5	0.0288554	1.53977	ASB3
12	98263251	98463251	2.98476	73	4	0.0216165	1.66521	ANKS1B
7	150352743	150552743	2.98429	124	7	0.0330396	1.48096	ATG9B,ABCB8,ACCN3,CDK5,SLC4A2,FASTK,TMUB1,CENTG3,LOC442747,ASB10,ABCF2
12	124863251	125063251	2.98386	84	5	0.029176	1.53497	LOC644152,LOC728171
6	40526089	40726089	2.98263	96	5	0.0294966	1.53023	LRFN2,LOC729918
4	12261566	12461566	2.97789	69	4	0.0218515	1.66052	HSP90AB2P
4	11861566	12061566	2.97784	66	4	0.0220865	1.65587	LOC644753,HS3ST1
12	120863251	121063251	2.9755	59	3	0.0155235	1.80901	WDR66,BCL7A,NULL
15	55443224	55643224	2.9733	157	8	0.0424242	1.37239	CGNL1
19	53617034	53817034	2.97185	116	6	0.0333828	1.47648	GRIN2D,GRWD1,KCNJ14,PSCD2,LMTK3,SULT2B1,FAM83E,SPACA4,RPL18
3	32436044	32636044	2.96927	78	4	0.0223214	1.65128	CMTM7,CMTM6,LOC285260,DYNC1LI1,LOC391526
21	36487640	36687640	2.96235	91	5	0.0298172	1.52553	DOPEY2,LOC402026,MORC3,LOC728793,CHAF1B
16	79424045	79624045	2.95893	108	6	0.0341246	1.46693	CDYL2,C16orf61,CENPN
12	39463251	39663251	2.95741	97	5	0.0301379	1.52089	CNTN1
19	48617034	48817034	2.95643	145	8	0.0484848	1.31439	TEX101,LYPD3,PHLDB3,NULL,ETHE1,ZNF575,LOC729244,XRCC1,LOC390940,IRGQ,ZNF576,ZNF428
10	87688481	87888481	2.95421	89	5	0.0304585	1.51629	GRID1
1	161142429	161342429	2.94813	104	6	0.0348665	1.45759	C1orf110,RGS4
2	206214445	206414445	2.9479	81	5	0.0307791	1.51174	PARD3B,NRP2
14	68736664	68936664	2.9473	83	5	0.0310997	1.50724	EXDL2,GALNTL1,ERH,SLC39A9
17	9019389	9219389	2.94675	98	5	0.0314203	1.50279	NTN1,STX8
3	142436044	142636044	2.94314	71	4	0.0225564	1.64673	ACPL2,ZBTB38
5	1311298	1511298	2.94101	99	5	0.0317409	1.49838	TERT,CLPTM1L,SLC6A3,LOC728594,LPCAT1
2	32614445	32814445	2.9408	66	4	0.0227914	1.64223	BIRC6,TTC27
8	8362939	8562939	2.9388	119	6	0.0356083	1.44845	PRAGMIN,CLDN23
4	43061566	43261566	2.93207	39	2	0.0401003	1.39685	LOC441013
12	3063251	3263251	2.92921	130	7	0.0352423	1.45294	TSPAN9,LOC387825
7	8352743	8552743	2.92876	94	5	0.0320616	1.49402	NXPH1
12	12263251	12463251	2.92339	78	4	0.0230263	1.63778	BCL2L14,LRP6,MANSC1,LOH12CR1
12	97663251	97863251	2.92119	82	5	0.0323822	1.48969	ANKS1B
8	80762939	80962939	2.91619	50	3	0.0158845	1.79903	STMN2,LOC729782,HEY1,MRPS28
15	22643224	22843224	2.91603	90	5	0.0327028	1.48542	SNRPN,SNURF,NULL
5	179111298	179311298	2.91479	91	5	0.0330234	1.48118	MAML1,LTC4S,MGAT4B,LOC646040,SQSTM1,LOC51149,TBC1D9B,RNF130
9	115644551	115844551	2.91365	92	5	0.033344	1.47698	ZNF618
13	110795297	110995297	2.91293	107	6	0.0363501	1.43949	C13orf16
20	53011244	53211244	2.91256	63	4	0.0232613	1.63337	DOK5
1	80742429	80942429	2.9116	80	5	0.0336646	1.47283	LOC646526,LPHN2,LOC646538
20	32411244	32611244	2.91122	92	5	0.0339853	1.46871	ITCH,DYNLRB1,MAP1LC3A
14	55936664	56136664	2.91049	125	7	0.0374449	1.42661	PELI2,C14orf101
5	88311298	88511298	2.90951	45	3	0.0162455	1.78927	MEF2C
8	124762939	124962939	2.90488	102	6	0.037092	1.43072	ANXA13,FAM91A1,FER1L6
3	88636044	88836044	2.90443	48	3	0.0166065	1.77972	LOC344653,C3orf38,LOC728432
6	71526089	71726089	2.90382	93	5	0.0343059	1.46463	SMAP1,B3GAT2
20	42011244	42211244	2.8963	108	6	0.0378338	1.42212	TOX2,JPH2
8	76562939	76762939	2.8941	82	5	0.0346265	1.46059	HNF4G
15	99643224	99843224	2.89339	169	9	0.0405405	1.39211	SNRPA1,PCSK6
2	224814445	225014445	2.89256	73	4	0.0234962	1.629	FAM124B,CUL3
8	35762939	35962939	2.88881	46	3	0.0169675	1.77038	UNC5D
2	50214445	50414445	2.88753	92	5	0.0349471	1.45659	NRXN1
20	48011244	48211244	2.88634	83	5	0.0352677	1.45262	KRT18P4,SNAI1,TMEM189-UBE2V1,UBE2V1,TMEM189
3	62036044	62236044	2.88392	82	5	0.0355883	1.44869	PTPRG,ID2B
2	16814445	17014445	2.88334	58	3	0.0173285	1.76124	FAM49A
6	127326089	127526089	2.88243	54	3	0.0176895	1.75228	RSPO3
12	50663251	50863251	2.88094	94	5	0.0359089	1.4448	ACVR1B,GRASP,NR4A1,C12orf44,KRT80
15	34843224	35043224	2.88005	106	6	0.0385757	1.41369	C15orf41,MEIS2
10	111288481	111488481	2.8785	49	3	0.0180505	1.74351	LOC645318,XPNPEP1
6	7126089	7326089	2.87489	83	5	0.0362296	1.44094	RREB1,SSR1,CAGE1
3	95636044	95836044	2.87084	46	3	0.0184116	1.73491	LOC389137,NSUN3
4	94061566	94261566	2.86645	47	3	0.0187726	1.72648	GRID2
7	73352743	73552743	2.86585	47	3	0.0191336	1.7182	CLIP2,GTF2IRD1
2	3614445	3814445	2.86441	119	6	0.0393175	1.40541	COLEC11,ALLC,LOC728597
1	80542429	80742429	2.86364	62	4	0.0237312	1.62468	LOC646526,ELTD1,LPHN2
17	52819389	53019389	2.8636	104	6	0.0400593	1.3973	MSI2
14	77936664	78136664	2.86352	101	6	0.0408012	1.38933	NRXN3
2	21414445	21614445	2.86051	58	3	0.0194946	1.71009	APOB,LOC645949
4	102661566	102861566	2.85893	70	4	0.0239662	1.6204	FLJ20021,BANK1
2	11814445	12014445	2.85621	71	4	0.0242011	1.61616	LPIN1,LOC729285,LOC729992
4	99461566	99661566	2.85494	74	4	0.0244361	1.61197	RAP1GDS1,TSPAN5
5	164511298	164711298	2.85454	60	4	0.0246711	1.60781	LOC391845,MAT2B,LOC728843
11	62388510	62588510	2.85445	108	6	0.041543	1.3815	SLC3A2,CHRM1,SLC22A6,SLC22A8
3	54836044	55036044	2.85143	109	6	0.0422849	1.37382	CACNA2D3,LRTM1
9	444551	644551	2.84944	106	6	0.0430267	1.36626	DOCK8,LOC645586,ANKRD15
7	33552743	33752743	2.84869	82	5	0.0365502	1.43711	BBS9
12	9663251	9863251	2.84839	97	5	0.0368708	1.43332	LOC644138,LOC374443,CLEC2D,CLECL1,CD69,LOC644170
10	71688481	71888481	2.84301	88	5	0.0371914	1.42956	NPFFR1,LRRC20,C10orf37,EIF4EBP2,NODAL
18	29815890	30015890	2.84243	53	3	0.0198556	1.70212	NOL4
13	96395297	96595297	2.83974	56	3	0.0202166	1.69429	OXGR1,MBNL2
8	132962939	133162939	2.83563	90	5	0.037512	1.42583	EFR3A,OC90,HHLA1
5	13711298	13911298	2.83527	105	6	0.0437685	1.35884	LOC391738,DNAH5
12	120663251	120863251	2.83223	66	4	0.024906	1.6037	TMEM120B,RHOF,LOC338799,SETD1B,HPD,PSMD9,WDR66
8	114962939	115162939	2.83028	79	4	0.025141	1.59962	hCG_1644355,CSMD3
3	151636044	151836044	2.83009	70	4	0.0253759	1.59558	TSC22D2,SERP1,EIF2A,SELT
20	32211244	32411244	2.82901	49	3	0.0205776	1.6866	LOC729547,EIF2S2,LOC729557,ASIP,AHCY,ITCH
2	71014445	71214445	2.82794	86	5	0.0378326	1.42213	ATP6V1B1,ANKRD53,TEX261,OR7E91P,NAGK,MCEE,MPHOSPH10
1	81742429	81942429	2.82715	98	5	0.0381533	1.41847	LOC646555,LOC646556,LPHN2,LOC729828
15	24243224	24443224	2.82695	69	4	0.0256109	1.59158	GABRB3,LOC730017
1	199742429	199942429	2.82591	79	4	0.0258459	1.58761	CSRP1,LOC376693,NAV1
19	3217034	3417034	2.82465	67	4	0.0260808	1.58368	BRUNOL5,NFIC
11	5988510	6188510	2.82193	78	4	0.0263158	1.57978	OR56A4,OR56A1,C11orf42,OR56B4,OR52B2,OR52W1
20	41011244	41211244	2.82041	74	4	0.0265508	1.57592	PTPRT
18	25015890	25215890	2.81974	56	3	0.0209386	1.67905	LOC440490,CDH2
4	42861566	43061566	2.81801	58	3	0.0212996	1.67163	LOC389207,LOC441013
1	10742429	10942429	2.81454	80	5	0.0384739	1.41483	CASZ1,C1orf127
1	10942429	11142429	2.81391	80	5	0.0387945	1.41123	C1orf127,LOC390996,TARDBP,MASP2,SRM,EXOSC10,FRAP1
2	73014445	73214445	2.81172	68	4	0.0267857	1.5721	EMX1,SFXN5,RAB11FIP5
7	156152743	156352743	2.81109	65	4	0.0270207	1.5683	RNF32,LMBR1
7	126552743	126752743	2.80798	113	6	0.0445104	1.35154	GRM8,LOC646873
12	30663251	30863251	2.80772	81	5	0.0391151	1.40766	IPO8,CAPRIN2,LOC645485
10	50088481	50288481	2.80769	102	6	0.0452522	1.34436	C10orf128,C10orf71,DRGX
11	46788510	46988510	2.80744	84	5	0.0394357	1.40411	CKAP5,LRP4,C11orf49
2	48814445	49014445	2.80563	104	6	0.0459941	1.3373	GTF2A1L,LHCGR,LOC646936
1	82142429	82342429	2.8053	72	4	0.0272556	1.56454	LPHN2
10	10488481	10688481	2.80388	75	4	0.0274906	1.56082	CUGBP2,TCEB1P3
11	95388510	95588510	2.80304	131	7	0.0396476	1.40178	MAML2
10	84688481	84888481	2.80138	53	3	0.0216606	1.66433	NRG3
13	66595297	66795297	2.80133	85	5	0.0397563	1.40059	PCDH9,LOC730236,LOC400141
12	8863251	9063251	2.80101	103	6	0.0467359	1.33035	A2ML1,PHC1,M6PR,KLRG1
10	92888481	93088481	2.80002	70	4	0.0277256	1.55712	NUDT9P1,PCGF5
12	121863251	122063251	2.79875	75	4	0.0279605	1.55345	CCDC62,HIP1R,LOC728014,VPS37B,ABCB9,OGFOD2,ARL6IP4,PITPNM2
20	56411244	56611244	2.79741	96	5	0.0400769	1.39711	VAPB,APCDD1L,LOC149773,MGC4294
20	57411244	57611244	2.79385	104	6	0.0474777	1.32351	LOC645605,EDN3,PHACTR3
2	148214445	148414445	2.78892	51	3	0.0220217	1.65715	ACVR2A,ORC4L
9	131844551	132044551	2.78851	89	5	0.0403976	1.39364	FNBP1,GPR107,FLJ46836,FREQ
2	167614445	167814445	2.78539	67	4	0.0281955	1.54982	XIRP2
17	39619389	39819389	2.77989	98	5	0.0407182	1.39021	TMUB2,ATXN7L3,UBTF,LOC728651,SLC4A1,RUNDC3A,SLC25A39,GRN,MGC34829,ITGA2B
11	122188510	122388510	2.77937	91	5	0.0410388	1.38681	UBASH3B,CRTAM,C11orf63,BSX,LOC341056
16	73024045	73224045	2.77907	85	5	0.0413594	1.38343	LOC497190,GLG1,RFWD3
2	50414445	50614445	2.77678	77	4	0.0284305	1.54622	NRXN1
2	22814445	23014445	2.77586	72	4	0.0286654	1.54264	KLHL29,ATAD2B
4	98261566	98461566	2.77246	45	3	0.0223827	1.65009	C4orf37
3	109836044	110036044	2.77143	70	4	0.0289004	1.5391	DZIP3,RETNLB,TRAT1
11	83588510	83788510	2.77128	70	4	0.0291353	1.53558	DLG2
10	92688481	92888481	2.77039	86	5	0.04168	1.38007	ANKRD1,LOC643599,NUDT9P1
1	6542429	6742429	2.7685	99	5	0.0420006	1.37674	TAS1R1,ZBTB48,KLHL21,PHF13,THAP3,DNAJC11,CAMTA1
6	124926089	125126089	2.7674	97	5	0.0423213	1.37344	NKAIN2
8	22362939	22562939	2.76511	113	6	0.0482196	1.31678	PPP3CC,SORBS3,PDLIM2,C8orf58,KIAA1967,BIN3,FLJ14107
1	5942429	6142429	2.76393	93	5	0.0426419	1.37016	NPHP4,KCNAB2,CHD5
8	124962939	125162939	2.76388	75	4	0.0293703	1.53209	FER1L6,C8orf54,C8orf78
3	74636044	74836044	2.75976	57	3	0.0227437	1.64314	CNTN3
5	153111298	153311298	2.75966	60	4	0.0296053	1.52863	GRIA1,C5orf3
3	18436044	18636044	2.75233	63	4	0.0298402	1.5252	SATB1,LOC131185
2	46614445	46814445	2.74745	98	5	0.0429625	1.36691	RHOQ,PIGF,CRIPT,LOC730078,SOCS5
10	83888481	84088481	2.74737	93	5	0.0432831	1.36368	NRG3
7	5952743	6152743	2.74466	85	5	0.0436037	1.36048	RSPH10B,PMS2,JTV1,EIF2AK1,USP42
4	94461566	94661566	2.74458	59	3	0.0231047	1.6363	GRID2
2	36414445	36614445	2.74197	101	6	0.0489614	1.31015	CRIM1
8	74962939	75162939	2.7419	64	4	0.0300752	1.52179	UBE2W,TCEB1,TMEM70,LY96
10	103688481	103888481	2.74038	63	4	0.0303102	1.51841	C10orf76,HPS6,LDB1,PPRC1
10	57288481	57488481	2.73501	61	4	0.0305451	1.51506	LOC389970,ZWINT
1	24942429	25142429	2.73446	92	5	0.0439243	1.35729	CLIC4,LOC650612,RUNX3
2	225014445	225214445	2.73412	60	4	0.0307801	1.51173	CUL3
16	78024045	78224045	2.72871	113	6	0.0497033	1.30362	MAF
20	40011244	40211244	2.72823	121	7	0.0418502	1.3783	LOC643172,PTPRT
14	58336664	58536664	2.72724	94	5	0.044245	1.35414	LOC729646,LOC440181,DAAM1,AKR1B1P5
2	32414445	32614445	2.72455	79	4	0.031015	1.50843	BIRC6
9	15044551	15244551	2.72378	94	5	0.0445656	1.351	LOC389705,C9orf52
5	160511298	160711298	2.72241	90	5	0.0448862	1.34789	GABRB2
17	21219389	21419389	2.7179	35	2	0.0426065	1.37052	KCNJ12,C17orf51,LOC645479
18	64815890	65015890	2.71675	88	5	0.0452068	1.3448	CCDC102B
12	30863251	31063251	2.71644	135	7	0.0440529	1.35603	LOC645485,LOC390299,LOC729381,TSPAN11
22	24035160	24235160	2.71462	66	4	0.03125	1.50515	IGLL3,LOC729882,LRP5L,ADRBK2
10	114288481	114488481	2.7116	52	3	0.0234657	1.62957	VTI1A
11	988510	1188510	2.70755	35	2	0.0451128	1.3457	AP2A2,MUC6,MUC2,NULL,MUC5AC
3	13836044	14036044	2.70609	48	3	0.0238267	1.62294	WNT7A,TPRXL
14	45536664	45736664	2.7053	28	2	0.047619	1.32222	LOC729276,RPL10L,MDGA2
8	17562939	17762939	2.70509	137	7	0.0462555	1.33484	MTUS1,FGL1
18	5815890	6015890	2.7003	124	7	0.0484581	1.31463	LOC645355,TTMA,LOC729309,L3MBTL4
12	50463251	50663251	2.69794	80	5	0.0455274	1.34173	SCN8A,FIGNL2,LOC728503,ANKRD33,ACVRL1,ACVR1B
5	151711298	151911298	2.69465	74	4	0.031485	1.5019	NMUR2
4	166061566	166261566	2.69343	59	3	0.0241877	1.6164	LOC646966,LOC391710,TRIM61,LOC391711,C4orf39,LOC391713,LOC646989,TRIM60,TRIM75,TMEM192
6	120526089	120726089	2.69324	45	3	0.0245487	1.60997	LOC728727
9	28444551	28644551	2.69255	99	5	0.045848	1.33868	LINGO2
12	42663251	42863251	2.69051	48	3	0.0249097	1.60363	TMEM117
5	158311298	158511298	2.68793	60	4	0.0317199	1.49867	EBF1,RNF145
13	103195297	103395297	2.68785	61	4	0.0319549	1.49546	LOC728183,SLC10A2
7	82352743	82552743	2.68664	58	3	0.0252708	1.59738	PCLO
4	186061566	186261566	2.68555	81	5	0.0461686	1.33565	LOC728203,ACSL1,HELT,SLC25A4
4	186261566	186461566	2.68519	56	3	0.0256318	1.59122	SLC25A4,KIAA1430,LOC728525,SNX25
9	105644551	105844551	2.6837	79	4	0.0321898	1.49228	SMC2
3	170236044	170436044	2.68333	69	4	0.0324248	1.48912	EVI1,MDS1
7	4952743	5152743	2.68061	55	3	0.0259928	1.58515	MMD2,LOC729720,NULL,RBAK,LOC389458,LOC645700
14	92336664	92536664	2.67954	91	5	0.0464893	1.33265	GOLGA5,CHGA,ITPK1
8	144562939	144762939	2.6792	84	5	0.0468099	1.32966	MAFA,ZC3H3,LOC727872,GSDMDC1,C8orf73,NAPRT1,EEF1D,TIGD5,PYCRL
4	96661566	96861566	2.67764	85	5	0.0471305	1.3267	UNC5C,PDHA2
16	5024045	5224045	2.67721	64	4	0.0326598	1.48599	MGC45438,ALG1,FAM86A,LOC729935
5	134511298	134711298	2.67507	94	5	0.0474511	1.32375	LOC389328,H2AFY
14	102736664	102936664	2.67446	64	4	0.0328947	1.48287	LOC730253,LOC441698,EIF5,MARK3
13	38795297	38995297	2.67263	93	5	0.0477717	1.32083	LHFP
20	18611244	18811244	2.66717	81	5	0.0480923	1.31792	DTD1,HSPC072,C20orf79
5	158511298	158711298	2.66376	84	5	0.048413	1.31504	RNF145,UBLCP1,IL12B
2	71214445	71414445	2.66355	68	4	0.0331297	1.47978	MPHOSPH10,PAIP2B,ZNF638
11	46188510	46388510	2.66122	75	4	0.0333647	1.47671	CREB3L1,DGKZ,MDK,CHRM4,AMBRA1
1	6742429	6942429	2.66024	61	4	0.0335996	1.47367	CAMTA1
4	162061566	162261566	2.65749	66	4	0.0338346	1.47064	FSTL5
14	93536664	93736664	2.65705	98	5	0.0487336	1.31217	C14orf48,OTUB2,DDX24,FAM14B,IFI27,FAM14A,KIAA1622
4	25661566	25861566	2.65645	59	3	0.0263538	1.57916	LOC645481,RBPJ
9	105844551	106044551	2.65577	82	5	0.0490542	1.30932	SMC2,LOC347281
2	176814445	177014445	2.65465	62	4	0.0340695	1.46763	LOC129841,MTX2,LOC728884
4	139661566	139861566	2.65319	85	5	0.0493748	1.30649	SLC7A11,CCRN4L
20	47811244	48011244	2.65298	86	5	0.0496954	1.30368	B4GALT5,SLC9A8,SPATA2,ZNF313,KRT18P4
4	4461566	4661566	2.6485	62	4	0.0343045	1.46465	D4S234E,STX18,LOC728015
1	112742429	112942429	2.63991	67	4	0.0345395	1.46168	CTTNBP2NL,WNT2B,ST7L
13	22995297	23195297	2.63843	70	4	0.0347744	1.45874	TNFRSF19,MIPEP
4	16661566	16861566	2.63551	73	4	0.0350094	1.45582	LOC729006,LDB2,QDPR
12	50063251	50263251	2.63448	79	4	0.0352444	1.45291	LOC728476,SLC4A8,SCN8A
6	82526089	82726089	2.63382	65	4	0.0354793	1.45002	FAM46A,LOC728360
19	17417034	17617034	2.63324	78	4	0.0357143	1.44716	NXNL1,SLC27A1,PGLS,FAM129C,GLT25D1,UNC13A
8	108762939	108962939	2.63259	64	4	0.0359492	1.44431	ANGPT1,RSPO2
15	58443224	58643224	2.62958	75	4	0.0361842	1.44148	ANXA2,LOC401817,NARG2,RORA
20	1211244	1411244	2.62942	78	4	0.0364192	1.43867	SNPH,SDCBP2,FKBP1A,NSFL1C,SIRPB2
18	10815890	11015890	2.62579	78	4	0.0366541	1.43588	C18orf58,FAM38B,LOC645932
4	167061566	167261566	2.62149	75	4	0.0368891	1.4331	TLL1
13	53595297	53795297	2.62147	49	3	0.0267148	1.57325	RP11-365K22.1,OLFM4
7	95752743	95952743	2.61913	55	3	0.0270758	1.56742	SLC25A13,FLJ42280
12	118663251	118863251	2.61672	56	3	0.0274368	1.56167	CIT,CCDC64
4	40261566	40461566	2.61461	63	4	0.0371241	1.43034	RBM47,NSUN7
4	12461566	12661566	2.61433	77	4	0.037359	1.4276	HSP90AB2P,RAB28
21	25687640	25887640	2.6116	52	3	0.0277978	1.55599	LOC284821,MIRN155,MRPL39
13	76795297	76995297	2.61077	45	3	0.0281588	1.55039	MYCBP2,SCEL
2	104214445	104414445	2.6089	53	3	0.0285199	1.54485	LOC728838,LOC284998,MRPS9
12	32863251	33063251	2.60118	76	4	0.037594	1.42488	PKP2,NULL
2	183214445	183414445	2.60056	67	4	0.0378289	1.42218	DNAJC10,FRZB
1	173942429	174142429	2.59637	67	4	0.0380639	1.41949	RFWD2
8	76362939	76562939	2.59076	62	4	0.0382989	1.41681	HNF4G
4	16461566	16661566	2.58934	61	4	0.0385338	1.41416	LDB2,LOC729006
2	62214445	62414445	2.58766	63	4	0.0387688	1.41152	COMMD1,LOC729209,B3GNT2
12	98063251	98263251	2.5849	54	3	0.0288809	1.53939	ANKS1B
9	105444551	105644551	2.58244	51	3	0.0292419	1.53399	SMC2
7	80152743	80352743	2.57737	72	4	0.0390038	1.40889	CD36,SEMA3C
16	48424045	48624045	2.57483	51	3	0.0296029	1.52867	ZNF423,TMEM188
4	190061566	190261566	2.57081	67	4	0.0392387	1.40629	LOC728856,TRIML1
14	102936664	103136664	2.56897	71	4	0.0394737	1.40369	MARK3,CKB,C14orf172,BAG5,C14orf153
16	72624045	72824045	2.56822	70	4	0.0397086	1.40111	LOC441506,PSMD7,LOC401859
18	27415890	27615890	2.56694	64	4	0.0399436	1.39855	TTR,B4GALT6,LOC646778,hCG_1642947,MCART2,KIAA1012
11	69988510	70188510	2.56012	78	4	0.0401786	1.39601	SHANK2
4	47861566	48061566	2.5534	74	4	0.0404135	1.39347	TEC,SLAIN2
9	111244551	111444551	2.55274	79	4	0.0406485	1.39096	PTPN3,LOC402375,PALM2
10	84888481	85088481	2.55086	58	3	0.0299639	1.5234	LOC728027,NRG3
8	54562939	54762939	2.54796	69	4	0.0408835	1.38845	ATP6V1H
3	177436044	177636044	2.54349	65	4	0.0411184	1.38596	LOC730168,NAALADL2
10	57088481	57288481	2.53901	62	4	0.0413534	1.38349	LOC389970,ZWINT
19	17217034	17417034	2.53125	61	4	0.0415883	1.38103	USHBP1,C19orf62,ANKRD41,ABHD8,MRPL34,DDA1,TMEM16H,GTPBP3,PLVAP,BST2,FAM125A,NXNL1
4	101661566	101861566	2.5287	60	4	0.0418233	1.37858	EMCN,LOC728771
2	44214445	44414445	2.52753	69	4	0.0420583	1.37615	PPM1B,SLC3A1,PREPL
4	148861566	149061566	2.52641	65	4	0.0422932	1.37373	ARHGAP10
14	99536664	99736664	2.52583	62	4	0.0425282	1.37132	LOC341965,EVL,DEGS2
15	82043224	82243224	2.52524	59	3	0.0303249	1.5182	SH3GL3,ADAMTSL3
4	18461566	18661566	2.5252	51	3	0.0306859	1.51306	LOC729071,LCORL
13	25795297	25995297	2.52481	79	4	0.0427632	1.36893	CDK8,LOC651386
3	119836044	120036044	2.52024	62	4	0.0429981	1.36655	IGSF11
1	170342429	170542429	2.51905	61	4	0.0432331	1.36418	DNM3
14	64736664	64936664	2.51816	63	4	0.043468	1.36183	LOC646279,FUT8,LOC645431
8	125162939	125362939	2.51287	65	4	0.043703	1.35949	FER1L6,LOC392268,LOC442396,C8orf78,TMEM65
4	27261566	27461566	2.51175	67	4	0.043938	1.35716	LOC391642
4	21661566	21861566	2.50904	69	4	0.0441729	1.35484	UM9(5),GPR125
20	39411244	39611244	2.50747	73	4	0.0444079	1.35254	LPIN3,EMILIN3,CHD6
1	215742429	215942429	2.50719	68	4	0.0446429	1.35025	GPATCH2,SPATA17
3	163036044	163236044	2.50586	63	4	0.0448778	1.34797	LOC131149
4	149061566	149261566	2.50441	63	4	0.0451128	1.3457	ARHGAP10,NR3C2
2	22614445	22814445	2.49958	58	3	0.0310469	1.50798	LOC645949,KLHL29,ATAD2B
18	33815890	34015890	2.49851	71	4	0.0453477	1.34344	BRUNOL4
7	2152743	2352743	2.49561	78	4	0.0455827	1.3412	MAD1L1,FTSJ2,NUDT1,SNX8,LOC727926,EIF3B
9	97044551	97244551	2.4948	62	4	0.0458177	1.33897	FANCC,LOC643342,PTCH1
2	137614445	137814445	2.4919	75	4	0.0460526	1.33675	THSD7B
12	43063251	43263251	2.49157	59	3	0.0314079	1.50296	TMEM117,NELL2
13	39395297	39595297	2.49075	66	4	0.0462876	1.33454	LOC646953,COG6
5	145911298	146111298	2.48859	74	4	0.0465226	1.33234	PPP2R2B
10	82888481	83088481	2.48848	59	3	0.031769	1.498	LOC389990,SH2D4B,LOC727960
2	102814445	103014445	2.48768	52	3	0.03213	1.49309	TMEM182
2	47414445	47614445	2.48722	70	4	0.0467575	1.33015	BCYRN1,TACSTD1,MSH2,KCNK12,hCG_2040054
2	148414445	148614445	2.48403	63	4	0.0469925	1.32797	ORC4L,LOC647065
5	127311298	127511298	2.47691	53	3	0.032491	1.48824	hCG_1981531,SLC12A2
5	146711298	146911298	2.47671	71	4	0.0472274	1.32581	STK32A,DPYSL3,JAKMIP2
9	102444551	102644551	2.47666	67	4	0.0474624	1.32365	LOC347273,LOC644160
14	52736664	52936664	2.47592	68	4	0.0476974	1.32151	DDHD1
7	117352743	117552743	2.47514	58	3	0.032852	1.48344	CTTNBP2,LSM8
11	73988510	74188510	2.47383	77	4	0.0479323	1.31937	POLD3,CHRDL2,LOC440055,RNF169
4	109461566	109661566	2.46742	70	4	0.0481673	1.31725	LOC644993,LOC645003,RPL34,LOC391681,FLJ37673
3	12636044	12836044	2.46419	61	4	0.0484023	1.31513	RAF1,LOC643983,TMEM40,KRT18P17,CAND2
1	24742429	24942429	2.46055	68	4	0.0486372	1.31303	RCAN3,C1orf130,SRRM1,CLIC4
13	53195297	53395297	2.45927	68	4	0.0488722	1.31094	OLFM4,RP11-365K22.1
1	201742429	201942429	2.45899	53	3	0.033213	1.47869	OPTC,LOC647250,ATP2B4
17	64819389	65019389	2.45576	69	4	0.0491071	1.30886	ABCA5,MAP2K6
5	157511298	157711298	2.45165	61	4	0.0493421	1.30678	LOC345471,CLINT1,EBF1
13	94795297	94995297	2.45103	63	4	0.0495771	1.30472	ABCC4,CLDN10
6	95126089	95326089	2.44811	63	4	0.049812	1.30267	LOC644569,MANEA
4	105861566	106061566	2.44457	58	3	0.033574	1.474	LOC391679
12	121063251	121263251	2.44161	53	3	0.033935	1.46935	MLXIP,LRRC43,IL31,B3GNT4,DIABLO
2	130214445	130414445	2.44023	56	3	0.034296	1.46476	LOC729958,A26C1B,LOC389033
22	44635160	44835160	2.4387	58	3	0.034657	1.46021	ATXN10,WNT7B,LOC727975,C22orf26
1	14742429	14942429	2.43469	56	3	0.0350181	1.45571	RP1-21O18.1,KIAA1026
4	154261566	154461566	2.43151	53	3	0.0353791	1.45125	TRIM2,ANXA2P1
16	19824045	20024045	2.4289	44	3	0.0357401	1.44684	GPRC5B,GPR139
12	16863251	17063251	2.42251	41	3	0.0361011	1.44248	LOC728622,LMO3,LOC387845
18	66615890	66815890	2.42088	56	3	0.0364621	1.43816	GTSCR1,SOCS6
11	38788510	38988510	2.41675	47	3	0.0368231	1.43388	LOC646388,LRRC4C
5	144711298	144911298	2.39621	54	3	0.0371841	1.42964	PRELID2
15	45243224	45443224	2.39263	53	3	0.0375451	1.42545	SEMA6D
4	93861566	94061566	2.39131	47	3	0.0379061	1.42129	GRID2
18	75015890	75215890	2.3828	57	3	0.0382671	1.41717	ATP9B,LOC727779
22	39635160	39835160	2.37735	57	3	0.0386282	1.4131	XPNPEP3,RBX1,LOC391334,LOC730143,EP300
4	115861566	116061566	2.36666	57	3	0.0389892	1.40906	UGT8,NDST4
1	93542429	93742429	2.35994	59	3	0.0393502	1.40505	CCDC18,DR1,FNBP1L
3	124636044	124836044	2.35851	56	3	0.0397112	1.40109	ADCY5,LOC729223,PTPLB,MYLK
3	181236044	181436044	2.35765	52	3	0.0400722	1.39716	PEX5L,LOC131054
5	18911298	19111298	2.35413	59	3	0.0404332	1.39326	CDH18,LOC646273
4	157661566	157861566	2.349	59	3	0.0407942	1.3894	hCG_1814936,PDGFC
4	93661566	93861566	2.33322	59	3	0.0411552	1.38557	GRID2
7	1952743	2152743	2.33003	51	3	0.0415162	1.38178	MAD1L1
5	164311298	164511298	2.31566	52	3	0.0418773	1.37802	LOC391845,MAT2B
12	21663251	21863251	2.31496	58	3	0.0422383	1.37429	GYS2,LDHB,KCNJ8,ABCC9
4	179061566	179261566	2.31267	45	3	0.0425993	1.3706	LOC285501
2	137814445	138014445	2.30548	54	3	0.0429603	1.36693	THSD7B
17	43619389	43819389	2.30483	58	3	0.0433213	1.3633	SKAP1
8	68362939	68562939	2.30385	56	3	0.0436823	1.35969	ARFGEF1,CPA6
2	148614445	148814445	2.3035	50	3	0.0440433	1.35612	LOC647065,ORC4L
18	9215890	9415890	2.29446	59	3	0.0444043	1.35257	ANKRD12,LOC729437,TWSG1
2	115614445	115814445	2.29368	56	3	0.0447653	1.34906	DPP10
18	49415890	49615890	2.2886	58	3	0.0451264	1.34557	LOC390856
4	76261566	76461566	2.28705	57	3	0.0454874	1.34211	LOC643100
7	1552743	1752743	2.27896	57	3	0.0458484	1.33868	TMEM184A,PSMG3,TCF6L1,LOC401296,ELFN1,MAD1L1
4	98061566	98261566	2.2769	49	3	0.0462094	1.33527	C4orf37
3	109636044	109836044	2.26119	54	3	0.0465704	1.33189	MYH15,KIAA1524,DZIP3
4	32261566	32461566	2.25983	42	3	0.0469314	1.32854	LOC642305,PCDH7
7	108952743	109152743	2.25038	58	3	0.0472924	1.32521	EIF3IP1,LOC154907
1	71742429	71942429	2.24742	56	3	0.0476534	1.32191	NEGR1
12	15263251	15463251	2.24738	49	3	0.0480144	1.31863	RERG,LOC728996,PTPRO
3	110636044	110836044	2.24332	44	3	0.0483755	1.31537	DPPA4,LOC440973
3	119436044	119636044	2.22568	52	3	0.0487365	1.31215	IGSF11
5	63111298	63311298	2.2183	55	3	0.0490975	1.30894	HTR1A,RNF180
3	18036044	18236044	2.21623	59	3	0.0494585	1.30576	TBC1D5,SATB1
14	92936664	93136664	2.2113	49	3	0.0498195	1.3026	COX8C,KIAA1409

## Sheet: XP-EHH;TIB-JPT
chromosome	start	end	statistics	snp.count	bin.lab	P value	-log10(P value)	genes
1	229342429	229542429	6.48593	87	5	0.000321647	3.49262	TRIM67,FLJ30430,C1orf131,GNPAT,EXOC8,C1orf124
13	102995297	103195297	6.29581	86	5	0.000643294	3.19159	LOC728183
2	58814445	59014445	6.24416	77	4	0.000234247	3.63033	hCG_15200,LOC730134,FANCL
2	46414445	46614445	6.22868	104	6	0.00074184	3.12969	EPAS1,LOC388946,ATP6V1E2,RHOQ
15	38843224	39043224	6.00827	34	2	0.00260417	2.58433	GCHFR,LOC643338,DNAJC17,ZFYVE19,PPP1R14D,SPINT1,RHOV,VPS18,DLL4,CHAC1
16	78224045	78424045	5.95452	67	4	0.000468494	3.3293	MAF,LOC440389
17	34019389	34219389	5.83428	71	4	0.000702741	3.1532	SNIP,MLLT6,PCGF2,PSMB3,PIP4K2B,CCDC49
15	38643224	38843224	5.55321	64	4	0.000936988	3.02827	CCDC32,RPUSD2,CASC5,LOC729029,RAD51,FAM82C
2	61614445	61814445	5.50017	42	3	0.000359842	3.44389	XPO1,LOC647077,FLJ13305
1	229742429	229942429	5.39997	80	5	0.00096494	3.0155	TSNAX,DISC1
15	38443224	38643224	5.37941	73	4	0.00117123	2.93136	DISP2,C15orf23,IVD,BAHD1,CHST14,MRPL42P5,CCDC32
22	45235160	45435160	5.35928	88	5	0.00128659	2.89056	CELSR1,LOC728077,DIP,GRAMD4
5	111111298	111311298	5.25583	66	4	0.00140548	2.85217	C5orf13
2	61414445	61614445	5.17342	53	3	0.000719683	3.14286	USP34,LOC647074,XPO1
1	46342429	46542429	5.16155	76	4	0.00163973	2.78523	PIK3R3,TSPAN1,POMGNT1,C1orf190,RAD54L,LRRC41
16	78424045	78624045	5.13749	114	6	0.00148368	2.82866	LOC440389,LOC729847
20	43011244	43211244	4.98921	74	4	0.00187398	2.72724	TOMM34,STK4,KCNS1,WFDC5,WFDC12
8	137162939	137362939	4.98378	62	4	0.00210822	2.67608	KHDRBS3
1	196542429	196742429	4.92177	64	4	0.00234247	2.63033	NEK7,ATP6V1G3
8	36362939	36562939	4.91137	37	2	0.00520833	2.2833	KCNU1,FKSG2
21	35687640	35887640	4.76786	60	4	0.00257672	2.58893	RUNX1,SETD4
11	78188510	78388510	4.76408	75	4	0.00281096	2.55114	ODZ4,LOC729746
5	88111298	88311298	4.7193	34	2	0.0078125	2.10721	MEF2C
2	26414445	26614445	4.70585	97	5	0.00160823	2.79365	SELI,C2orf39,OTOF
19	34617034	34817034	4.70073	48	3	0.00107953	2.96677	LOC284395,POP4,VSTM2B,LOC727974
13	70195297	70395297	4.67055	34	2	0.0104167	1.98227	LOC647277
5	87911298	88111298	4.63447	49	3	0.00143937	2.84183	LOC645323,MEF2C
15	49443224	49643224	4.61958	72	4	0.00304521	2.51638	GLDN,DMXL2
13	94795297	94995297	4.58516	51	3	0.00179921	2.74492	ABCC4,CLDN10
17	75419389	75619389	4.54979	84	5	0.00192988	2.71447	CBX4,TBC1D16
17	68019389	68219389	4.5386	70	4	0.00327946	2.4842	SLC39A11
7	107952743	108152743	4.53355	31	2	0.0130208	1.88536	PNPLA8,THAP5,DNAJB9
10	119288481	119488481	4.5141	122	7	0.00220264	2.65706	EMX2,EMX2OS
11	26588510	26788510	4.47861	116	6	0.00222552	2.65257	TMEM16C,SLC5A12
2	20414445	20614445	4.45702	109	6	0.00296736	2.52763	PUM2,LOC729606,RHOB,hCG_1795065
5	111511298	111711298	4.42581	96	5	0.00225153	2.64752	C5orf26,SNORA13,EPB41L4A
1	117942429	118142429	4.32486	79	4	0.0035137	2.45423	FAM46C,LOC401959,GDAP2
1	213942429	214142429	4.31065	129	7	0.00440529	2.35603	USH2A
3	120636044	120836044	4.28187	95	5	0.00257317	2.58953	TMEM39A,KTELC1,C3orf1,CD80,ADPRH,PLA1A,LOC442086
9	104044551	104244551	4.26817	80	5	0.00289482	2.53838	GRIN3A,CYLC2
12	17263251	17463251	4.25698	62	4	0.00374795	2.42621	LOC390297,LMO3,RERGL,LOC390298
2	46214445	46414445	4.22863	119	6	0.0037092	2.43072	PRKCE,EPAS1
5	111311298	111511298	4.20862	68	4	0.0039822	2.39988	C5orf13,C5orf26,EPB41L4A
19	34817034	35017034	4.1663	80	5	0.00321647	2.49262	LOC727974,POP4,PLEKHF1,C19orf12,CCNE1
22	45035160	45235160	4.15376	87	5	0.00353812	2.45123	PKDREJ,FLJ20699,GTSE1,TRMU,CELSR1
3	45036044	45236044	4.10088	107	6	0.00445104	2.35154	CLEC3B,CDCP1,LOC729684,TMEM158
3	121836044	122036044	4.09925	66	4	0.00421644	2.37505	HGD,LOC727722,RABL3,GTF2E1
13	21195297	21395297	4.09433	118	6	0.00519288	2.28459	FGF9
18	65615890	65815890	4.07454	84	5	0.00385976	2.41344	DOK6,CD226,RTTN
2	35814445	36014445	4.0662	86	5	0.00418141	2.37868	CRIM1
10	111088481	111288481	4.04559	49	3	0.00215905	2.66574	LOC645318,XPNPEP1
3	122636044	122836044	4.03396	96	5	0.00450306	2.34649	POLQ,LOC728992,ARGFX,FBXO40,HCLS1
9	14444551	14644551	4.03289	142	8	0.00606061	2.21748	NFIB,ZDHHC21
14	90336664	90536664	4.02119	66	4	0.00445069	2.35157	TTC7B,RPS6KA5
12	27863251	28063251	3.99843	64	4	0.00468494	2.3293	KLHDC5,PTHLH
1	110942429	111142429	3.99687	86	5	0.0048247	2.31653	KCNA2,LOC728161,KCNA3,CD53,LOC643232
11	18188510	18388510	3.9868	93	5	0.00514635	2.2885	LOC494141,SAA4,SAA2,SAA1,HPS5,GTF2H1,LDHA
16	27824045	28024045	3.96869	72	4	0.00491918	2.30811	GSG1L,XPO6
10	2688481	2888481	3.96145	124	7	0.00660793	2.17993	LOC727878,LOC441546,PFKP
14	68736664	68936664	3.94471	83	5	0.005468	2.26217	EXDL2,GALNTL1,ERH,SLC39A9
2	61214445	61414445	3.93889	65	4	0.00515343	2.2879	KIAA1841,LOC339804,AHSA2,USP34
5	162911298	163111298	3.9294	65	4	0.00538768	2.2686	MAT2B,LOC391844
22	26035160	26235160	3.90205	146	8	0.0121212	1.91645	MN1
16	81624045	81824045	3.89959	165	9	0.0135135	1.86923	CDH13
2	71414445	71614445	3.88182	96	5	0.00578964	2.23735	ZNF638,DYSF
21	41487640	41687640	3.8712	114	6	0.00593472	2.2266	PLAC4,BACE2,FAM3B,MX2
3	25436044	25636044	3.85459	129	7	0.00881057	2.055	RARB,TOP2B
1	196742429	196942429	3.84488	66	4	0.00562193	2.25011	ATP6V1G3,PTPRC
17	11219389	11419389	3.83704	61	4	0.00585617	2.23239	FLJ45455
2	16814445	17014445	3.82281	58	3	0.00251889	2.59879	FAM49A
3	25636044	25836044	3.82177	76	4	0.00609042	2.21535	TOP2B,NGLY1,LOC728572,OXSM
8	129162939	129362939	3.8151	111	6	0.00667656	2.17545	TMEM75,MYC
9	131844551	132044551	3.79711	89	5	0.00611129	2.21387	FNBP1,GPR107,FLJ46836,FREQ
11	115388510	115588510	3.79372	55	3	0.00287873	2.5408	LOC728842,BUD13
12	98263251	98463251	3.78389	73	4	0.00632467	2.19896	ANKS1B
1	229942429	230142429	3.78199	92	5	0.00643294	2.19159	DISC1,DISC2
2	31014445	31214445	3.76958	92	5	0.00675458	2.1704	GALNT14
13	39395297	39595297	3.74792	66	4	0.00655891	2.18317	LOC646953,COG6
17	64019389	64219389	3.74119	76	4	0.00679316	2.16793	PRKAR1A,FAM20A
13	39595297	39795297	3.73322	114	6	0.0074184	2.12969	LOC646953,LOC646982,FOXO1
1	163342429	163542429	3.70914	120	7	0.0110132	1.95809	LMX1A
1	18742429	18942429	3.7026	94	5	0.00707623	2.1502	KLHDC7A,PAX7
16	81424045	81624045	3.70048	139	7	0.0132159	1.8789	CDH13
16	77024045	77224045	3.69401	152	8	0.0181818	1.74036	WWOX,LOC645957
10	123888481	124088481	3.6864	136	7	0.0154185	1.81196	TACC2,BTBD16
8	125962939	126162939	3.67921	107	6	0.00816024	2.0883	ZNF572,SQLE,KIAA0196
3	181036044	181236044	3.67608	56	3	0.00323858	2.48965	PEX5L
8	36162939	36362939	3.66858	40	3	0.00359842	2.44389	UNC5D,KCNU1,FKSG2
1	196142429	196342429	3.66543	69	4	0.00702741	2.1532	LHX9,LOC647195
20	39611244	39811244	3.66437	61	4	0.00726165	2.13896	CHD6
4	32261566	32461566	3.65384	42	3	0.00395826	2.4025	LOC642305,PCDH7
2	166014445	166214445	3.6537	36	2	0.015625	1.80618	SCN2A,FAM130A2
12	113463251	113663251	3.65255	66	4	0.0074959	2.12518	TBX3
12	48463251	48663251	3.64195	92	5	0.00739788	2.13089	LOC283331,KIAA1602,BCDIN3D,FAIM2,AQP2,AQP5,AQP6
7	70952743	71152743	3.62756	60	4	0.00773015	2.11181	CALN1,LOC728453
12	97663251	97863251	3.61687	82	5	0.00771952	2.11241	ANKS1B
4	102661566	102861566	3.60053	70	4	0.00796439	2.09885	FLJ20021,BANK1
6	32526089	32726089	3.59763	97	5	0.00804117	2.09468	HLA-DRA,HLA-DRB5,HLA-DRB6,HLA-DRB1,HLA-DQA1
12	9063251	9263251	3.59645	90	5	0.00836282	2.07765	KLRG1,LOC643996,C12orf33,A2M,PZP
1	112542429	112742429	3.59492	74	4	0.00819864	2.08626	CTTNBP2NL
2	104414445	104614445	3.58839	50	3	0.0043181	2.36471	LOC284998,MRPS9
6	124726089	124926089	3.57493	98	5	0.00868446	2.06126	NKAIN2
3	74636044	74836044	3.57295	57	3	0.00467794	2.32995	CNTN3
3	122036044	122236044	3.55967	49	3	0.00503778	2.29776	GTF2E1,STXBP5L
5	8511298	8711298	3.55675	67	4	0.00843289	2.07402	LOC729506,SEMA5A
11	113588510	113788510	3.55584	144	8	0.0242424	1.61542	ZBTB16,NNMT,C11orf71,RBM7
19	43417034	43617034	3.55315	103	6	0.00890208	2.05051	DPF1,PPP1R14A,SPINT2,LOC541469,C19orf33,YIF1B,KCNK6,C19orf15,PSMD8,GGN,SPRED3,FAM98C,RASGRP4,RYR1
9	87244551	87444551	3.54711	74	4	0.00866714	2.06212	AGTPBP1
4	11861566	12061566	3.54301	66	4	0.00890138	2.05054	LOC644753,HS3ST1
2	16614445	16814445	3.53671	86	5	0.00900611	2.04546	FAM49A
16	79424045	79624045	3.52093	108	6	0.00964392	2.01575	CDYL2,C16orf61,CENPN
22	17835160	18035160	3.50584	110	6	0.0103858	1.98356	UFD1L,CDC45L,CLDN5,5-Sep,39696
12	98063251	98263251	3.50337	54	3	0.00539763	2.2678	ANKS1B
7	23352743	23552743	3.50022	60	4	0.00913563	2.03926	IGF2BP3,TRA2A
3	7636044	7836044	3.488	122	7	0.0176211	1.75397	GRM7
3	141236044	141436044	3.47547	87	5	0.00932776	2.03022	CLSTN2
15	76643224	76843224	3.47329	37	2	0.0182292	1.73923	CHRNA5,CHRNA3,CHRNB4,LOC390612,LOC646934,LOC646938,ADAMTS7
7	157352743	157552743	3.46804	67	4	0.00936988	2.02827	PTPRN2,hCG_1999814
18	60815890	61015890	3.46717	43	3	0.00575747	2.23977	CDH7
3	184236044	184436044	3.46641	74	4	0.00960412	2.01754	MCCC1,LAMP3,MCF2L2
4	18461566	18661566	3.46514	51	3	0.00611731	2.21344	LOC729071,LCORL
1	72142429	72342429	3.45865	74	4	0.00983837	2.00708	NEGR1
11	32388510	32588510	3.45849	72	4	0.0100726	1.99686	WT1,WIT1,EIF3M,CCDC73
4	18661566	18861566	3.45499	45	3	0.00647715	2.18862	LOC729071,LCORL,SLIT2
6	56126089	56326089	3.44722	86	5	0.0096494	2.0155	COL21A1,LOC442221
7	35152743	35352743	3.44455	42	3	0.00683699	2.16513	LOC646869,TBX20
3	120436044	120636044	3.43877	81	5	0.00997105	2.00126	B4GALT4,CDGAP,TMEM39A
4	96261566	96461566	3.43859	90	5	0.0102927	1.98747	BMPR1B,UNC5C
4	12061566	12261566	3.43796	72	4	0.0103069	1.98687	LOC644753,HSP90AB2P,RAB28
10	51688481	51888481	3.43565	101	6	0.0111276	1.9536	LOC728532,ASAH2,SGMS1
3	50436044	50636044	3.42442	83	5	0.0106143	1.97411	CACNA2D2,C3orf18,HEMK1,CISH,MAPKAPK3
2	18014445	18214445	3.42271	94	5	0.010936	1.96114	KCNS3
2	11814445	12014445	3.42084	71	4	0.0105411	1.97711	LPIN1,LOC729285,LOC729992
21	35887640	36087640	3.40802	61	4	0.0107754	1.96757	SETD4
1	109742429	109942429	3.40717	72	4	0.0110096	1.95823	SORT1,PSMA5,SYPL2,ATXN7L2,CYB561D1,AMIGO1,GPR61,GNAI3
3	115636044	115836044	3.40587	58	3	0.00719683	2.14286	ZBTB20
7	19352743	19552743	3.4048	105	6	0.0118694	1.92557	FERD3L,TWISTNB
3	12636044	12836044	3.4005	61	4	0.0112439	1.94908	RAF1,LOC643983,TMEM40,KRT18P17,CAND2
16	15624045	15824045	3.39888	98	5	0.0112576	1.94855	KIAA0430,NDE1,MYH11
17	53619389	53819389	3.3987	113	6	0.0126113	1.89924	EPX,MKS1,LPO,MPO,BZRAP1,SUPT4H1,RNF43
11	6188510	6388510	3.39686	108	6	0.0133531	1.87442	C11orf56,CNGA4,CCKBR,PRKCDBP,SMPD1,APBB1
15	65243224	65443224	3.39381	87	5	0.0115793	1.93632	SMAD3,FLJ11506,IQCH
6	124926089	125126089	3.3915	97	5	0.0119009	1.92442	NKAIN2
1	169142429	169342429	3.38927	86	5	0.0122226	1.91284	C1orf129,LOC646804,FMO3
5	133911298	134111298	3.38172	64	4	0.0114781	1.94013	PHF15,SAR1B,SEC24A,CAMLG
3	117036044	117236044	3.38101	70	4	0.0117123	1.93136	LSAMP
5	134311298	134511298	3.37862	73	4	0.0119466	1.92276	PCBD2,CATSPER3,PITX1,LOC389328
2	28414445	28614445	3.37084	82	5	0.0125442	1.90156	BRE,FOSL2,PLB1
1	166742429	166942429	3.36882	109	6	0.014095	1.85094	XCL2,XCL1,DPT
9	129844551	130044551	3.36295	102	6	0.0148368	1.82866	C9orf90,SLC25A25,PTGES2,LOC389791,LCN2,C9orf16,CIZ1,DNM1
15	97243224	97443224	3.35416	118	6	0.0155786	1.80747	IGF1R,LOC145814,LOC728959,DMN
11	14188510	14388510	3.35231	81	5	0.0128659	1.89056	SPON1,RRAS2,LOC401676
21	41687640	41887640	3.33636	99	5	0.0131875	1.87984	MX2,MX1,TMPRSS2
12	9263251	9463251	3.33622	72	4	0.0121808	1.91432	PZP,LOC642846,LOC728704,LOC728715,LOC728719
8	49362939	49562939	3.33366	50	3	0.00755668	2.12167	LOC389655,EFCAB1
11	62388510	62588510	3.33156	108	6	0.0163205	1.78727	SLC3A2,CHRM1,SLC22A6,SLC22A8
1	207942429	208142429	3.29984	97	5	0.0135092	1.86937	HSD11B1,TRAF3IP3,C1orf74,IRF6,C1orf107
2	14814445	15014445	3.29809	77	4	0.0124151	1.90605	FAM84A,NAG
3	11636044	11836044	3.29779	97	5	0.0138308	1.85915	VGLL4,C3orf31
3	138236044	138436044	3.29491	63	4	0.0126493	1.89793	NULL,IL20RB
10	57288481	57488481	3.29206	61	4	0.0128836	1.88996	LOC389970,ZWINT
20	56611244	56811244	3.28932	101	6	0.0170623	1.76796	MGC4294,STX16,NPEPL1,LOC391258,NESPAS
21	25687640	25887640	3.28762	52	3	0.00791652	2.10147	LOC284821,MIRN155,MRPL39
5	144711298	144911298	3.28698	54	3	0.00827636	2.08216	PRELID2
7	1952743	2152743	3.28269	51	3	0.0086362	2.06368	MAD1L1
7	37152743	37352743	3.27718	100	6	0.0178042	1.74948	ELMO1
12	118863251	119063251	3.27374	92	5	0.0141525	1.84917	CCDC64,RAB35,GCN1L1
1	109942429	110142429	3.27237	101	6	0.018546	1.73175	GNAI3,GNAT2,AMPD2,LOC441896,GSTM4,GSTM2,GSTM1,GSTM5,GSTM3,EPS8L3
2	203814445	204014445	3.26775	88	5	0.0144741	1.83941	CYP20A1,ABI2,RAPH1
3	28436044	28636044	3.26664	48	3	0.00899604	2.04595	ZCWPW2,C3orf53
8	28162939	28362939	3.26083	92	5	0.0147958	1.82986	LOC389644,PNOC,ZNF395,FBXO16
8	25562939	25762939	3.25932	82	5	0.0151174	1.82052	CDCA2,EBF2
10	113488481	113688481	3.25509	72	4	0.0131178	1.88214	GPAM
2	209614445	209814445	3.24356	58	3	0.00935588	2.02892	LOC130195,LOC402116,MAP2
20	52811244	53011244	3.23728	84	5	0.015439	1.81138	DOK5
7	1752743	1952743	3.22758	67	4	0.0133521	1.87445	ELFN1,MAD1L1
11	15188510	15388510	3.22603	78	4	0.0135863	1.8669	INSC
3	8236044	8436044	3.22467	82	5	0.0157607	1.80242	LMCD1
9	104444551	104644551	3.22387	84	5	0.0160823	1.79365	CYLC2
10	101688481	101888481	3.22087	47	3	0.00971573	2.01252	DNMBP,CPN1,LOC644566
7	2152743	2352743	3.21916	78	4	0.0138206	1.85947	MAD1L1,FTSJ2,NUDT1,SNX8,LOC727926,EIF3B
11	95388510	95588510	3.21616	131	7	0.0198238	1.70281	MAML2
15	99643224	99843224	3.21527	169	9	0.027027	1.5682	SNRPA1,PCSK6
16	48424045	48624045	3.21371	51	3	0.0100756	1.99673	ZNF423,TMEM188
17	77019389	77219389	3.2105	71	4	0.0140548	1.85217	BAHCC1,LOC644012,ACTG1,FSCN2,C17orf70,NPLOC4,TSPAN10
1	85742429	85942429	3.20703	84	5	0.016404	1.78505	DDAH1,CYR61,C1orf181
7	158352743	158552743	3.19325	58	3	0.0104354	1.98149	WDR60,LOC442366,VIPR2
8	124962939	125162939	3.18181	75	4	0.0142891	1.845	FER1L6,C8orf54,C8orf78
10	111288481	111488481	3.18121	49	3	0.0107953	1.96677	LOC645318,XPNPEP1
17	16219389	16419389	3.18043	65	4	0.0145233	1.83793	UBB,TRPV2,C17orf45,SNORD49B,C17orf76,ZNF287
13	23995297	24195297	3.17427	106	6	0.0192878	1.71472	PARP4,LOC374491,ATP12A
11	44788510	44988510	3.17197	115	6	0.0200297	1.69833	TSPAN18,TP53I11
4	115861566	116061566	3.16491	57	3	0.0111551	1.95253	UGT8,NDST4
2	48814445	49014445	3.16423	104	6	0.0207715	1.68253	GTF2A1L,LHCGR,LOC646936
2	49014445	49214445	3.15876	119	6	0.0215134	1.66729	LOC646936,FSHR
11	32188510	32388510	3.15731	95	5	0.0167256	1.77662	RCN1,LOC729636,WT1
2	165814445	166014445	3.15505	23	2	0.0208333	1.68124	SCN2A,LOC643397,TTC21B
11	24588510	24788510	3.15155	109	6	0.0222552	1.65257	LUZP2
9	7044551	7244551	3.15086	147	8	0.030303	1.51851	JMJD2C
15	27643224	27843224	3.14976	80	5	0.0170473	1.76834	TJP1
8	124762939	124962939	3.14396	102	6	0.022997	1.63833	ANXA13,FAM91A1,FER1L6
10	122888481	123088481	3.13621	82	5	0.0173689	1.76023	LOC646255,FGFR2
2	12014445	12214445	3.1332	100	6	0.0237389	1.62454	LOC729992,LPIN1
1	71942429	72142429	3.13049	51	3	0.0115149	1.93874	NEGR1
20	56011244	56211244	3.12502	77	4	0.0147576	1.83099	C20orf85,C20orf86
14	52736664	52936664	3.12334	68	4	0.0149918	1.82415	DDHD1
6	136126089	136326089	3.12057	79	4	0.015226	1.81741	PDE7B
17	16019389	16219389	3.12028	85	5	0.0176906	1.75226	NCOR1,PIGL,PRR6,UBB
10	100288481	100488481	3.11842	71	4	0.0154603	1.81078	HPSE2
5	13711298	13911298	3.11752	105	6	0.0244807	1.61118	LOC391738,DNAH5
2	24814445	25014445	3.11288	69	4	0.0156945	1.80425	NCOA1,LOC391356,CENPO,ADCY3,LOC729714,RBJ
21	36087640	36287640	3.11053	67	4	0.0159288	1.79782	SETD4
14	84536664	84736664	3.10746	82	5	0.0180122	1.74443	LOC730034,FLRT2
1	81742429	81942429	3.10586	98	5	0.0183339	1.73675	LOC646555,LOC646556,LPHN2,LOC729828
8	49562939	49762939	3.1002	54	3	0.0118748	1.92537	FLJ46365,EFCAB1
6	57326089	57526089	3.0997	31	2	0.0234375	1.63009	PRIM2
6	57126089	57326089	3.09942	85	5	0.0186555	1.72919	ZNF451,BAG2,RAB23,PRIM2
6	15326089	15526089	3.09808	58	3	0.0122346	1.91241	JARID2
9	84644551	84844551	3.09708	60	4	0.016163	1.79148	RASEF
6	28526089	28726089	3.09107	111	6	0.0252226	1.59821	COX11P,GPX6,GPX5,ZNF452,LOC646160
1	18942429	19142429	3.08938	99	5	0.0189772	1.72177	PAX7,TAS1R2,ALDH4A1,LOC729664
2	53014445	53214445	3.08499	83	5	0.0192988	1.71447	ASB3
6	112126089	112326089	3.0831	71	4	0.0163973	1.78523	FYN,LOC728541
7	108152743	108352743	3.08174	50	3	0.0125945	1.89982	LOC154907
13	72595297	72795297	3.07565	100	6	0.0259644	1.58562	FABP5L1,KLF5,LOC647279
18	33615890	33815890	3.07433	40	3	0.0129543	1.88759	BRUNOL4
11	100188510	100388510	3.07415	114	6	0.0267062	1.57339	FLJ32810,PGR,TMEM133
7	34352743	34552743	3.07012	85	5	0.0196205	1.70729	AAA1,BMPER
2	40214445	40414445	3.06561	155	8	0.0363636	1.43933	SLC8A1
15	65443224	65643224	3.06434	64	4	0.0166315	1.77907	IQCH,LOC145853,MAP2K5
1	44142429	44342429	3.06145	90	5	0.0199421	1.70023	ST3GAL3,ARTN,IPO13,DPH2,ATP6V0B,B4GALT2,CCDC24,SLC6A9,LOC644743
8	35962939	36162939	3.05279	37	2	0.0260417	1.58433	UNC5D
1	112742429	112942429	3.05178	67	4	0.0168658	1.77299	CTTNBP2NL,WNT2B,ST7L
4	12261566	12461566	3.05156	69	4	0.0171	1.767	HSP90AB2P
18	74415890	74615890	3.05124	80	5	0.0202638	1.69328	LOC649290,SALL3
3	63636044	63836044	3.04767	63	4	0.0173343	1.76109	FLJ44379,C3orf49,THOC7,ATXN7
2	192014445	192214445	3.04697	61	4	0.0175685	1.75526	MYO1B,LOC729245
3	132636044	132836044	3.04402	72	4	0.0178028	1.74951	MRPL3,SNORA58,LOC729670,CPNE4
7	82752743	82952743	3.04365	86	5	0.0205854	1.68644	SEMA3E
7	82552743	82752743	3.0418	67	4	0.018037	1.74384	PCLO,SEMA3E
14	43336664	43536664	3.0408	65	4	0.0182713	1.73823	LOC390472,LOC645086,C14orf28
9	130044551	130244551	3.04033	82	5	0.020907	1.67971	DNM1,GOLGA2,C9orf119,TRUB2,COQ4,SLC27A4,URM1,LOC729772,CERCAM
7	20352743	20552743	3.03895	89	5	0.0212287	1.67308	ITGB8,ABCB5
12	12463251	12663251	3.03398	78	4	0.0185055	1.7327	LOH12CR1,DUSP16,LOC644467,CREBL2
3	63436044	63636044	3.03202	118	6	0.0274481	1.56149	SYNPR,FLJ44379
9	14644551	14844551	3.03125	170	9	0.0405405	1.39211	ZDHHC21,CER1,FREM1
10	30288481	30488481	3.02884	97	5	0.0215503	1.66655	KIAA1462,LOC729663
3	181236044	181436044	3.02198	52	3	0.0133141	1.87569	PEX5L,LOC131054
17	54619389	54819389	3.02163	83	5	0.021872	1.66011	PRR11,C17orf71,GDPD1,YPEL2
2	206214445	206414445	3.01977	81	5	0.0221936	1.65377	PARD3B,NRP2
2	26614445	26814445	3.01531	58	3	0.013674	1.8641	OTOF,LOC339778,CIB4,KCNK3
3	5436044	5636044	3.01286	90	5	0.0225153	1.64752	EDEM1
3	28636044	28836044	3.01253	101	6	0.0281899	1.54991	C3orf53,ZCWPW2
12	17463251	17663251	3.0102	79	4	0.0187398	1.72724	LOC390298,RERGL
13	72395297	72595297	3.00964	60	4	0.018974	1.72184	PIBF1,KLF5,FABP5L1
17	77819389	78019389	3.00904	86	5	0.0228369	1.64136	CSNK1D,CD7,SECTM1,FLJ35767,UTS2R,FLJ22222,HEXDC,C17orf62,NARF
3	4436044	4636044	3.00683	107	6	0.0289318	1.53863	SUMF1,ITPR1
3	109836044	110036044	3.00417	70	4	0.0192082	1.71651	DZIP3,RETNLB,TRAT1
20	53011244	53211244	3.00113	63	4	0.0194425	1.71125	DOK5
9	34244551	34444551	3.00077	67	4	0.0196767	1.70605	KIF24,NUDT2,KIAA1161,C9orf24,C9orf25
9	114044551	114244551	2.99745	53	3	0.0140338	1.85282	ROD1,LOC644996,HSDL2
4	157661566	157861566	2.99587	63	4	0.019911	1.70091	hCG_1814936,PDGFC
9	115644551	115844551	2.99564	92	5	0.0231586	1.63529	ZNF618
9	104244551	104444551	2.99479	50	3	0.0143937	1.84183	CYLC2
13	53395297	53595297	2.99413	82	5	0.0234802	1.6293	RP11-365K22.1
2	64614445	64814445	2.98869	70	4	0.0201452	1.69583	AFTPH,SERTAD2,LOC730184,LOC730187
22	26235160	26435160	2.98596	155	8	0.0424242	1.37239	MN1
1	111142429	111342429	2.98391	76	4	0.0203795	1.69081	LOC643232,CD53,C1orf103
17	1819389	2019389	2.97798	85	5	0.0238019	1.62339	RTN4RL1,DPH1-OVCA2,DPH1,OVCA2,LOC727986,HIC1,SMG6
10	103888481	104088481	2.97793	95	5	0.0241235	1.61756	PPRC1,NOLC1,ELOVL3,PITX3,GBF1
17	11019389	11219389	2.97707	53	3	0.0147535	1.8311	FLJ45455
16	31024045	31224045	2.97597	83	5	0.0244452	1.61181	BCKDK,MYST1,PRSS8,PRSS36,FUS,TRIM72,PYCARD,PYDC1,ITGAM
13	100795297	100995297	2.97284	98	5	0.0247668	1.60613	NALCN,ITGBL1
16	55224045	55424045	2.97238	83	5	0.0250885	1.60053	MT1M,MT1A,MT1DP,MT1B,MT1F,MT1G,NULL,MT1H,MT1X,NUP93
19	4417034	4617034	2.96991	68	4	0.0206137	1.68584	HDGF2,KIAA1881,LSDP5,LRG1,SEMA6B,TNFAIP8L1,C19orf10
14	45736664	45936664	2.96311	58	3	0.0151134	1.82064	RPL10L,MDGA2
5	91911298	92111298	2.96273	61	4	0.020848	1.68094	LOC391810,NR2F1
12	92663251	92863251	2.9617	108	6	0.0296736	1.52763	CRADD
2	49214445	49414445	2.96085	74	4	0.0210822	1.67608	FSHR
12	120863251	121063251	2.95911	59	3	0.0154732	1.81042	WDR66,BCL7A,NULL
13	53595297	53795297	2.95728	49	3	0.015833	1.80044	RP11-365K22.1,OLFM4
8	41562939	41762939	2.95667	94	5	0.0254101	1.59499	AGPAT6,NKX6-3,ANK1
11	73988510	74188510	2.95615	77	4	0.0213165	1.67128	POLD3,CHRDL2,LOC440055,RNF169
2	64814445	65014445	2.95027	88	5	0.0257317	1.58953	LOC730187,SERTAD2,LOC400958
21	37487640	37687640	2.94451	68	4	0.0215507	1.66654	TTC3,DSCR9,DSCR3,DYRK1A
16	25624045	25824045	2.94369	112	6	0.0304154	1.51691	HS3ST4,HMGN2P3
18	65415890	65615890	2.94175	105	6	0.0311573	1.50644	DOK6
11	62188510	62388510	2.93691	122	7	0.0220264	1.65706	C11orf48,LOC51035,LOC221091,BSCL2,GNG3,HNRPUL2,TTC9C,ZBTB3,POLR2G,TAF6L,TMEM179B,MGC3196,NXF1,STX5,WDR74,RNU2B,SNORD22,SNORD25,SLC3A2
3	132836044	133036044	2.93688	101	6	0.0318991	1.49622	CPNE4
1	183142429	183342429	2.93647	71	4	0.021785	1.66184	FAM129A,RNF2
10	71688481	71888481	2.93528	88	5	0.0260534	1.58414	NPFFR1,LRRC20,C10orf37,EIF4EBP2,NODAL
16	8824045	9024045	2.93473	73	4	0.0220192	1.6572	PMM2,CARHSP1,USP7,LOC729913
2	71214445	71414445	2.92902	68	4	0.0222535	1.6526	MPHOSPH10,PAIP2B,ZNF638
18	5815890	6015890	2.92658	124	7	0.0242291	1.61566	LOC645355,TTMA,LOC729309,L3MBTL4
13	76595297	76795297	2.92403	84	5	0.026375	1.57881	MYCBP2
10	17488481	17688481	2.92358	108	6	0.0326409	1.48624	ST8SIA6,PTPLA
2	73014445	73214445	2.92182	68	4	0.0224877	1.64805	EMX1,SFXN5,RAB11FIP5
2	196814445	197014445	2.92135	86	5	0.0266967	1.57354	HECW2
12	120663251	120863251	2.92094	66	4	0.0227219	1.64355	TMEM120B,RHOF,LOC338799,SETD1B,HPD,PSMD9,WDR66
10	30088481	30288481	2.92083	110	6	0.0333828	1.47648	SVIL,KIAA1462
6	127326089	127526089	2.91812	54	3	0.0161929	1.79068	RSPO3
10	105088481	105288481	2.9153	98	5	0.0270183	1.56834	PCGF6,TAF5,USMG5,PDCD11,FAM26B,FAM26C,FAM26A,NEURL
2	175214445	175414445	2.9117	72	4	0.0229562	1.6391	WIPF1,LOC440926,CHRNA1,CHN1
2	209814445	210014445	2.91107	48	3	0.0165527	1.78113	LOC402116,MAP2
7	70552743	70752743	2.91035	67	4	0.0231904	1.63469	WBSCR17
5	2511298	2711298	2.90783	109	6	0.0341246	1.46693	LOC728878,IRX2
1	160142429	160342429	2.90747	95	5	0.02734	1.5632	ATF6,OLFML2B,NOS1AP
12	96063251	96263251	2.90695	41	3	0.0169126	1.77179	NEDD1,LOC643711
21	36687640	36887640	2.90348	78	4	0.0234247	1.63033	CHAF1B,CLDN14,LOC728816
10	16888481	17088481	2.90019	143	8	0.0484848	1.31439	RSU1,CUBN
2	66814445	67014445	2.89968	46	3	0.0172724	1.76265	LOC730200,MEIS1
1	179542429	179742429	2.89922	81	5	0.0276616	1.55812	CACNA1E,LOC647041
11	12988510	13188510	2.89871	108	6	0.0348665	1.45759	LOC644943,ARNTL
4	7061566	7261566	2.89831	113	6	0.0356083	1.44845	TBC1D14,CCDC96,MGC21874,GRPEL1,LOC728529,SORCS2
3	72036044	72236044	2.89826	99	5	0.0279833	1.5531	PROK2,CCDC137P
5	92111298	92311298	2.89725	59	3	0.0176322	1.75369	LOC391810,NR2F1
2	204014445	204214445	2.89655	79	4	0.0236589	1.626	RAPH1,LOC729532,CD28
6	76726089	76926089	2.89442	61	4	0.0238932	1.62173	IMPG1
17	1619389	1819389	2.89417	98	5	0.0283049	1.54814	SERPINF1,SMYD4,RPA1,hCG_1776980,RTN4RL1
15	51443224	51643224	2.88952	101	6	0.0363501	1.43949	WDR72
6	2326089	2526089	2.88881	94	5	0.0286266	1.54323	GMDS,C6orf195
9	72244551	72444551	2.88854	86	5	0.0289482	1.53838	KLF9,TRPM3
10	57088481	57288481	2.88841	62	4	0.0241274	1.61749	LOC389970,ZWINT
1	229542429	229742429	2.88789	60	4	0.0243617	1.61329	C1orf124,EGLN1,LOC645339,TSNAX,LOC440731
14	63936664	64136664	2.8859	71	4	0.0245959	1.60914	MTHFD1,AKAP5,ZBTB25,ZBTB1,HSPA2,C14orf50
5	145711298	145911298	2.88238	82	5	0.0292699	1.53358	POU4F3,TCERG1,GPR151
1	94142429	94342429	2.88025	187	10	0.0263158	1.57978	GCLM,ABCA4
21	42887640	43087640	2.88005	109	6	0.037092	1.43072	SLC37A1,PDE9A
14	93536664	93736664	2.87882	98	5	0.0295915	1.52883	C14orf48,OTUB2,DDX24,FAM14B,IFI27,FAM14A,KIAA1622
1	82142429	82342429	2.8741	72	4	0.0248302	1.60502	LPHN2
14	73136664	73336664	2.87328	87	5	0.0299132	1.52414	ACOT6,DNAL1,PNMA1,C14orf43
13	28395297	28595297	2.87152	86	5	0.0302348	1.51949	KIAA0774
2	165614445	165814445	2.87045	57	3	0.0179921	1.74492	SCN3A,SCN2A
3	109636044	109836044	2.86773	54	3	0.0183519	1.73632	MYH15,KIAA1524,DZIP3
11	5988510	6188510	2.86217	78	4	0.0250644	1.60094	OR56A4,OR56A1,C11orf42,OR56B4,OR52B2,OR52W1
16	47424045	47624045	2.85858	60	4	0.0252987	1.5969	LOC728504,N4BP1,CBLN1
3	170636044	170836044	2.85715	79	4	0.0255329	1.5929	LOC730004,MDS1
1	196342429	196542429	2.85368	57	3	0.0187118	1.72789	LOC647195,NEK7
2	19614445	19814445	2.85141	105	6	0.0378338	1.42212	OSR1,TTC32
2	104214445	104414445	2.85031	53	3	0.0190716	1.71961	LOC728838,LOC284998,MRPS9
12	101463251	101663251	2.85013	78	4	0.0257672	1.58893	IGF1,PAH
7	23552743	23752743	2.84834	83	5	0.0305564	1.5149	TRA2A,CLK2P,CCDC126,C7orf46,STK31
12	52863251	53063251	2.84614	82	5	0.0308781	1.51035	SMUG1,CBX5,HNRNPA1,LOC728844,NFE2,COPZ1,GPR84,ZNF385A
9	13844551	14044551	2.84486	129	7	0.0264317	1.57787	LOC347193,LOC138864
2	201214445	201414445	2.84122	100	6	0.0385757	1.41369	AOX1,AOX2,BZW1,LOC391472
6	13326089	13526089	2.84063	113	6	0.0393175	1.40541	PHACTR1,TBC1D7,GFOD1
12	92063251	92263251	2.84024	49	3	0.0194315	1.71149	LOC643339,NUDT4
2	54414445	54614445	2.83858	55	3	0.0197913	1.70353	FLJ40298,LOC730106,SPTBN1,RPL23AP13
8	143762939	143962939	2.83835	93	5	0.0311997	1.50585	PSCA,LY6K,C8orf55,SLURP1,LYPD2,LYNX1,LY6D,GML,LOC646338,CYP11B1
1	24942429	25142429	2.83817	92	5	0.0315214	1.50139	CLIC4,LOC650612,RUNX3
12	126063251	126263251	2.83167	84	5	0.031843	1.49699	LOC121296,TMEM132B
4	116061566	116261566	2.83152	57	3	0.0201511	1.6957	NDST4
1	14542429	14742429	2.82204	93	5	0.0321647	1.49262	RP1-21O18.1,PRDM2,KIAA1026
20	56411244	56611244	2.82173	96	5	0.0324863	1.4883	VAPB,APCDD1L,LOC149773,MGC4294
10	92888481	93088481	2.81033	70	4	0.0260014	1.585	NUDT9P1,PCGF5
9	132644551	132844551	2.80855	85	5	0.032808	1.48402	ABL1,QRFP,FIBCD1,LAMC3
16	71424045	71624045	2.80619	122	7	0.0286344	1.54311	ZFHX3
8	144562939	144762939	2.80265	84	5	0.0331296	1.47978	MAFA,ZC3H3,LOC727872,GSDMDC1,C8orf73,NAPRT1,EEF1D,TIGD5,PYCRL
15	96643224	96843224	2.80052	114	6	0.0400593	1.3973	FLJ39743
9	132444551	132644551	2.80007	64	4	0.0262357	1.58111	FUBP3,LOC727824,PRDM12,EXOSC2,ABL1
4	177461566	177661566	2.79912	88	5	0.0334513	1.47559	SPCS3
15	22643224	22843224	2.79834	90	5	0.0337729	1.47143	SNRPN,SNURF,NULL
16	79224045	79424045	2.79727	76	4	0.0264699	1.57725	CDYL2
2	149214445	149414445	2.79216	42	3	0.020511	1.68801	EPC2,KIF5C
14	66936664	67136664	2.78926	114	6	0.0408012	1.38933	PLEK2,C14orf83,PLEKHH1,PIGH
14	73336664	73536664	2.7824	84	5	0.0340946	1.46731	C14orf43,ZADH1,ZNF410,C14orf44,COQ6,ENTPD5
7	110952743	111152743	2.77948	59	3	0.0208708	1.68046	IMMP2L,DOCK4
18	75215890	75415890	2.77936	87	5	0.0344162	1.46324	ATP9B,NFATC1
12	118663251	118863251	2.77769	56	3	0.0212307	1.67304	CIT,CCDC64
15	89843224	90043224	2.7762	81	5	0.0347379	1.4592	SV2B,SLCO3A1
16	71624045	71824045	2.77516	78	4	0.0267041	1.57342	ZFHX3,C16orf47,LOC283902
11	73788510	73988510	2.77145	84	5	0.0350595	1.45519	PGM2L1,KCNE3,LOC387787,NULL,POLD3
7	103352743	103552743	2.77145	85	5	0.0353812	1.45123	RELN,ORC5L
5	63111298	63311298	2.77057	55	3	0.0215905	1.66574	HTR1A,RNF180
16	25424045	25624045	2.76998	76	4	0.0269384	1.56963	HS3ST4,ZKSCAN2
15	45843224	46043224	2.76809	101	6	0.041543	1.3815	SEMA6D,SLC24A5
2	28614445	28814445	2.76699	72	4	0.0271726	1.56587	PLB1,PPP1CB
12	1463251	1663251	2.76602	121	7	0.030837	1.51093	ERC1,FBXL14,WNT5B,ADIPOR2
20	6011244	6211244	2.76453	95	5	0.0357028	1.4473	FERMT1,LOC643503
1	179742429	179942429	2.76285	73	4	0.0274069	1.56214	CACNA1E
9	117844551	118044551	2.76268	57	3	0.0219503	1.65856	PAPPA
13	40995297	41195297	2.76257	87	5	0.0360244	1.4434	KIAA0564
2	47214445	47414445	2.76229	81	5	0.0363461	1.43954	C2orf61,CALM2,BCYRN1,TACSTD1
18	75015890	75215890	2.76091	57	3	0.0223102	1.6515	ATP9B,LOC727779
12	67863251	68063251	2.75993	89	5	0.0366677	1.43572	CPSF6,LOC729409,LYZ,YEATS4
13	76395297	76595297	2.75925	99	5	0.0369894	1.43192	IRG1,CLN5,LOC390413,FBXL3,MYCBP2
2	205814445	206014445	2.75854	86	5	0.037311	1.42816	PARD3B
11	119188510	119388510	2.75704	90	5	0.0376327	1.42443	LOC390255,TRIM29
18	56815890	57015890	2.75554	61	4	0.0276411	1.55844	hCG_1659830,CDH20
12	13063251	13263251	2.75318	85	5	0.0379543	1.42074	HTR7P,KIAA1467,GSG1,EMP1
1	212542429	212742429	2.75204	106	6	0.0422849	1.37382	SMYD2,PTPN14,LOC643454
3	115436044	115636044	2.74765	79	4	0.0278754	1.55478	ZNF80,VSTM3,ZBTB20
17	10819389	11019389	2.7463	90	5	0.038276	1.41707	hCG_1776018,LOC644139,FLJ45455
7	24752743	24952743	2.74459	118	6	0.0430267	1.36626	DFNA5,OSBPL3,LOC730040
19	5417034	5617034	2.74401	81	5	0.0385976	1.41344	ZNRF4,PLAC2,SAFB2,SAFB
9	1644551	1844551	2.74178	136	7	0.0330396	1.48096	SMARCA2
3	44836044	45036044	2.74169	83	5	0.0389193	1.40984	KIF15,TMEM42,PPIAP18,TGM4,ZDHHC3,EXOSC7
12	8863251	9063251	2.74164	103	6	0.0437685	1.35884	A2ML1,PHC1,M6PR,KLRG1
11	13188510	13388510	2.73553	91	5	0.0392409	1.40626	ARNTL,BTBD10
1	65942429	66142429	2.73123	92	5	0.0395626	1.40272	LEPR,PDE4B
13	76795297	76995297	2.72682	45	3	0.02267	1.64455	MYCBP2,SCEL
6	136526089	136726089	2.7264	65	4	0.0281096	1.55114	PDE7B,FAM54A,BCLAF1,MAP7
9	87444551	87644551	2.72635	36	2	0.0286458	1.54294	AGTPBP1
20	47611244	47811244	2.7254	66	4	0.0283439	1.54754	PTGIS,LOC728671,B4GALT5
11	1388510	1588510	2.72478	71	4	0.0285781	1.54397	BRSK2,HCCA2,DUSP8,LOC649798,KRTAP5-1,KRTAP5-2,KRTAP5-3,KRTAP5-8
16	26824045	27024045	2.72408	85	5	0.0398842	1.3992	C16orf82,JMJD5,LOC730128
16	20224045	20424045	2.72222	64	4	0.0288124	1.54042	GP2,UMOD,PDILT,ACSM5,ACSM2A
3	12836044	13036044	2.71878	82	5	0.0402059	1.39571	CAND2,RPL32,IQSEC1
3	60236044	60436044	2.71817	118	6	0.0445104	1.35154	FHIT
1	81942429	82142429	2.71817	82	5	0.0405275	1.39225	LOC729828,LPHN2,LOC729831
2	46614445	46814445	2.71242	98	5	0.0408491	1.38882	RHOQ,PIGF,CRIPT,LOC730078,SOCS5
1	233142429	233342429	2.71175	47	3	0.0230299	1.63771	TOMM20
17	43819389	44019389	2.71139	72	4	0.0290466	1.5369	SKAP1,HOXB1,HOXB2,HOXB3,HOXB4,HOXB5
6	106526089	106726089	2.71	74	4	0.0292809	1.53342	PRDM1,ATG5
21	40287640	40487640	2.70684	113	6	0.0452522	1.34436	DSCAM
5	172111298	172311298	2.7066	103	6	0.0459941	1.3373	LOC401218,DUSP1,ERGIC1
10	53888481	54088481	2.70478	82	5	0.0411708	1.38541	LOC399774,DKK1,MBL2
8	6562939	6762939	2.70285	137	7	0.0352423	1.45294	AGPAT5,XKR5,DEFB1,LOC392181,DEFA6
2	130214445	130414445	2.7027	58	3	0.0233897	1.63098	LOC729958,A26C1B,LOC389033
13	29395297	29595297	2.70224	119	6	0.0467359	1.33035	LOC440131,KATNAL1
2	224814445	225014445	2.70075	73	4	0.0295151	1.52996	FAM124B,CUL3
4	181461566	181661566	2.69497	105	6	0.0474777	1.32351	LOC643179
10	92688481	92888481	2.69494	86	5	0.0414924	1.38203	ANKRD1,LOC643599,NUDT9P1
9	4844551	5044551	2.69424	93	5	0.0418141	1.37868	RCL1,JAK2
12	52663251	52863251	2.6939	80	5	0.0421357	1.37535	HOXC10,HOXC9,HOXC8,HOXC4,HOXC6,HOXC5,LOC644222,SMUG1
14	68336664	68536664	2.6911	102	6	0.0482196	1.31678	C14orf181,ZFP36L1,ACTN1
10	112288481	112488481	2.69054	91	5	0.0424574	1.37205	SMC3,RBM20
11	113188510	113388510	2.69023	84	5	0.042779	1.36877	USP28,HTR3B,HTR3A
17	53819389	54019389	2.68869	63	4	0.0297494	1.52652	RNF43,HSF5,MTMR4,39695,4-Sep,C17orf47,TEX14
8	23162939	23362939	2.68552	116	6	0.0489614	1.31015	CHMP7,R3HCC1,LOXL2,ENTPD4
11	121388510	121588510	2.67951	70	4	0.0299836	1.52312	SORL1,BLID
3	50236044	50436044	2.67738	110	6	0.0497033	1.30362	SLC38A3,GNAI2,SEMA3B,C3orf45,IFRD2,HYAL3,NAT6,HYAL1,HYAL2,TUSC2,RASSF1,ZMYND10,TUSC4,CYB561D2,TMEM115,CACNA2D2
22	44435160	44635160	2.67659	76	4	0.0302178	1.51974	LOC727955,ATXN10
10	114288481	114488481	2.67316	52	3	0.0237496	1.62434	VTI1A
5	133711298	133911298	2.67267	64	4	0.0304521	1.51638	CDKL3,UBE2B,CDKN2AIPNL,LOC391833,PHF15
1	99542429	99742429	2.67209	67	4	0.0306863	1.51305	LPPR4,PALMD
12	5463251	5663251	2.66991	121	7	0.0374449	1.42661	NTF3,TMEM16B
8	67362939	67562939	2.66884	66	4	0.0309206	1.50975	CRH,RRS1,ADHFE1,C8orf46
21	25487640	25687640	2.66779	57	3	0.0241094	1.61781	LOC284821,MRPL39
12	12263251	12463251	2.66717	78	4	0.0311548	1.50647	BCL2L14,LRP6,MANSC1,LOH12CR1
1	92142429	92342429	2.66716	83	5	0.0431007	1.36552	TGFBR3,BRDT,ABHD7,LOC646817,BTBD8
2	205614445	205814445	2.66609	92	5	0.0434223	1.36229	PARD3B
3	110036044	110236044	2.66606	83	5	0.043744	1.35908	TRAT1,GUCA1C,MORC1
5	114511298	114711298	2.66574	72	4	0.0313891	1.50322	TRIM36,LOC728254,PGGT1B,CCDC112
12	117863251	118063251	2.66537	94	5	0.0440656	1.3559	KIAA1853
1	241542429	241742429	2.66352	65	4	0.0316233	1.49999	SDCCAG8,LOC729199,AKT3
8	67162939	67362939	2.66349	64	4	0.0318576	1.49679	DNAJC5B,TRIM55,CRH
3	88436044	88636044	2.6618	61	4	0.0320918	1.49361	LOC344653
1	17742429	17942429	2.66152	80	5	0.0443873	1.35274	ARHGEF10L,ACTL8
9	115444551	115644551	2.66107	86	5	0.0447089	1.34961	RGS3,ZNF618
9	15844551	16044551	2.66024	82	5	0.0450306	1.34649	C9orf93
2	53214445	53414445	2.65749	97	5	0.0453522	1.3434	ASB3
4	54261566	54461566	2.6572	71	4	0.0323261	1.49045	LOC441016,LNX1,LOC402176
7	111152743	111352743	2.65473	76	4	0.0325603	1.48731	DOCK4
11	988510	1188510	2.65439	36	2	0.03125	1.50515	AP2A2,MUC6,MUC2,NULL,MUC5AC
3	50636044	50836044	2.65328	73	4	0.0327946	1.4842	MAPKAPK3,DOCK3,LOC646587
3	50836044	51036044	2.65328	67	4	0.0327946	1.4842	DOCK3
20	54411244	54611244	2.64944	95	5	0.0456739	1.34033	CSTF1,C20orf32,C20orf43,C20orf106,C20orf107,TFAP2C
15	65643224	65843224	2.64769	57	3	0.0244692	1.61138	MAP2K5
1	184942429	185142429	2.64523	66	4	0.0332631	1.47804	PTGS2,PLA2G4A
18	64015890	64215890	2.64315	127	7	0.0396476	1.40178	LOC653322,TXNDC10
5	163111298	163311298	2.64267	66	4	0.0334973	1.47499	LOC391844,MAT2B
16	80624045	80824045	2.63483	121	7	0.0418502	1.3783	HSD17B2,MPHOSPH6
15	65843224	66043224	2.63361	81	5	0.0459955	1.33728	MAP2K5,LBXCOR1,PIAS1
22	44635160	44835160	2.63254	58	3	0.0248291	1.60504	ATXN10,WNT7B,LOC727975,C22orf26
9	15044551	15244551	2.63121	94	5	0.0463171	1.33426	LOC389705,C9orf52
19	57417034	57617034	2.6297	92	5	0.0466388	1.33125	PPP2R1A,ZNF766,ZNF480,ZNF610,ZNF528
8	127762939	127962939	2.62788	75	4	0.0337316	1.47196	FAM84B
1	193542429	193742429	2.62661	63	4	0.0339658	1.46896	KCNT2
6	113926089	114126089	2.62641	50	3	0.0251889	1.59879	LOC728590,MARCKS
6	71526089	71726089	2.62552	93	5	0.0469604	1.32827	SMAP1,B3GAT2
5	88911298	89111298	2.62459	59	3	0.0255488	1.59263	LOC729011,MEF2C
17	54419389	54619389	2.62261	79	4	0.0342	1.46597	PPM1E,TRIM37,FAM33A,PRR11
19	53217034	53417034	2.61826	122	7	0.0440529	1.35603	ELSPBP1,CABP5,PLA2G4C,LIG1,LOC374920,CARD8
1	80742429	80942429	2.61822	80	5	0.0472821	1.3253	LOC646526,LPHN2,LOC646538
13	50195297	50395297	2.61776	86	5	0.0476037	1.32236	DLEU7,RNASEH2B
3	8036044	8236044	2.61738	75	4	0.0344343	1.46301	GRM7,LMCD1
12	98463251	98663251	2.61684	62	4	0.0346685	1.46006	ANKS1B,FAM71C
11	1588510	1788510	2.61671	94	5	0.0479254	1.31943	KRTAP5-3,KRTAP5-4,FAM99A,CTSD,KRTAP5-6,HCCA2,LOC649839,LOC390029
6	163126089	163326089	2.61525	66	4	0.0349028	1.45714	PACRG
4	161861566	162061566	2.61348	74	4	0.035137	1.45423	FSTL5
19	43617034	43817034	2.61291	37	2	0.0338542	1.47039	RYR1,MAP4K1,EIF3K
11	17588510	17788510	2.60753	81	5	0.048247	1.31653	OTOG,MYOD1,KCNC1,SERGEF
16	47224045	47424045	2.60711	42	3	0.0259086	1.58656	LOC728504,N4BP1
2	167414445	167614445	2.60666	49	3	0.0262684	1.58057	XIRP2
1	29142429	29342429	2.60366	83	5	0.0485687	1.31364	EPB41,TMEM200B,SFRS4
5	102911298	103111298	2.60245	34	2	0.0364583	1.4382	NUDT12
14	74136664	74336664	2.60143	62	4	0.0353713	1.45135	LTBP2,KIAA0317,FCF1,YLPM1
15	79043224	79243224	2.59907	80	5	0.0488903	1.31078	MESDC2,MESDC1,C15orf26,LOC647020
10	36088481	36288481	2.59818	76	4	0.0356055	1.44848	LOC439954,GJD4
1	91942429	92142429	2.59804	120	7	0.0462555	1.33484	TGFBR3
19	20417034	20617034	2.59689	35	2	0.0390625	1.40824	FLJ44894,ZNF826,ZNF626
3	148836044	149036044	2.5954	75	4	0.0358398	1.44563	FLJ30375,LOC344741,ZIC1
7	34752743	34952743	2.59421	91	5	0.049212	1.30793	AAA1,NPSR1,DPY19L1
11	47788510	47988510	2.59269	52	3	0.0266283	1.57466	NUP160,PTPRJ
5	134511298	134711298	2.59258	94	5	0.0495336	1.3051	LOC389328,H2AFY
13	96195297	96395297	2.59199	73	4	0.036074	1.44281	HS6ST3,OXGR1
6	114126089	114326089	2.58959	65	4	0.0363083	1.43999	LOC728590,MARCKS,FLJ34503
6	44526089	44726089	2.58707	126	7	0.0484581	1.31463	CDC5L,SUPT3H
3	88636044	88836044	2.58493	48	3	0.0269881	1.56883	LOC344653,C3orf38,LOC728432
19	3217034	3417034	2.58464	67	4	0.0365425	1.4372	BRUNOL5,NFIC
3	151436044	151636044	2.58404	70	4	0.0367768	1.43443	LOC730025,TSC22D2
10	98288481	98488481	2.58362	74	4	0.037011	1.43167	TM9SF3,PIK3AP1,LOC728658
16	28024045	28224045	2.58279	58	3	0.027348	1.56307	XPO6,LOC647001,SBK1
1	11342429	11542429	2.58127	73	4	0.0372453	1.42893	UBIAD1,PTCHD2
12	92263251	92463251	2.57787	81	5	0.0498553	1.30229	LOC643339,NUDT4,UBE2N,MRPL42,LOC144481
1	202942429	203142429	2.57784	74	4	0.0374795	1.42621	LRRN2,NFASC
3	89036044	89236044	2.5753	49	3	0.0277078	1.5574	LOC728432,EPHA3
4	32461566	32661566	2.57528	25	2	0.0416667	1.38021	LOC642305,PCDH7
8	118762939	118962939	2.57326	76	4	0.0377138	1.4235	EXT1
4	44261566	44461566	2.5727	66	4	0.037948	1.42081	YIPF7,GUF1,GNPDA2
1	9342429	9542429	2.56944	63	4	0.0381822	1.41814	SPSB1,SLC25A33
2	47814445	48014445	2.56847	70	4	0.0384165	1.41548	MSH6,FBXO11,LOC728971,LOC646907
3	88836044	89036044	2.56787	53	3	0.0280677	1.55179	LOC728432,EPHA3
5	164711298	164911298	2.56645	67	4	0.0386507	1.41284	LOC728843,MAT2B
9	95844551	96044551	2.56519	69	4	0.038885	1.41022	PTPDC1,ZNF169
11	36788510	36988510	2.56495	71	4	0.0391192	1.40761	C11orf74
2	62214445	62414445	2.55949	63	4	0.0393535	1.40502	COMMD1,LOC729209,B3GNT2
5	157311298	157511298	2.55903	73	4	0.0395877	1.40244	LOC644198,LOC345471,CLINT1
15	76843224	77043224	2.55782	63	4	0.039822	1.39988	ADAMTS7,LOC390614,MORF4L1,CTSH,RASGRF1
9	137644551	137844551	2.55626	77	4	0.0400562	1.39733	GLT6D1,LCN9,SOHLH1,KCNT1,CAMSAP1
9	95044551	95244551	2.55491	68	4	0.0402905	1.3948	WNK2,C9orf129,FAM120AOS
6	76926089	77126089	2.55042	57	3	0.0284275	1.54626	IMPG1,LOC643281
16	74424045	74624045	2.55024	66	4	0.0405247	1.39228	LOC124496,TERF2IP,LOC441775
14	84136664	84336664	2.54495	66	4	0.040759	1.38978	LOC730034,FLRT2
8	125162939	125362939	2.53564	65	4	0.0409932	1.38729	FER1L6,LOC392268,LOC442396,C8orf78,TMEM65
3	138636044	138836044	2.53295	55	3	0.0287873	1.5408	SOX14,IL20RB,CLDN18
21	37687640	37887640	2.53232	60	4	0.0412275	1.38481	DYRK1A,KCNJ6
16	58624045	58824045	2.52956	45	3	0.0291472	1.5354	LOC644649,LOC729155,GOT2
13	64195297	64395297	2.52874	69	4	0.0414617	1.38235	LOC647264,PCDH9
6	127126089	127326089	2.52872	43	3	0.029507	1.53007	LOC442257,RSPO3
16	61024045	61224045	2.52857	64	4	0.0416959	1.37991	CDH8
14	81336664	81536664	2.52767	66	4	0.0419302	1.37747	LOC730103,SEL1L
3	53236044	53436044	2.52763	73	4	0.0421644	1.37505	TKT,DCP1A,LOC391539
3	152236044	152436044	2.51847	74	4	0.0423987	1.37265	MED12L,GPR171,P2RY14
5	71311298	71511298	2.51476	66	4	0.0426329	1.37025	MAP1B
11	24788510	24988510	2.50937	68	4	0.0428672	1.36788	LUZP2
10	114088481	114288481	2.50833	55	3	0.0298669	1.52481	ACSL5,ZDHHC6,VTI1A
11	85588510	85788510	2.50652	79	4	0.0431014	1.36551	EED,C11orf73,CCDC81
2	149014445	149214445	2.4999	52	3	0.0302267	1.51961	MBD5,LOC730135,EPC2
14	20336664	20536664	2.49791	66	4	0.0433357	1.36315	RNASE1,RNASE3,LOC643332,RNASE2,METT11D1,SLC39A2
9	14844551	15044551	2.49379	73	4	0.0435699	1.36081	FREM1,LOC389705
1	46542429	46742429	2.49305	75	4	0.0438042	1.35848	UQCRH,NSUN4,FAAH,LOC729037,LOC644941,LOC729041,DMBX1
19	58817034	59017034	2.49076	67	4	0.0440384	1.35617	LOC646557,DPRX,LOC646565,NLRP12
11	84788510	84988510	2.48891	40	3	0.0305865	1.51447	TMEM126B
1	2742429	2942429	2.48626	66	4	0.0442727	1.35386	LOC390988,LOC728702,ACTRT2
18	21215890	21415890	2.48621	66	4	0.0445069	1.35157	ZNF521
17	63819389	64019389	2.47349	73	4	0.0447412	1.34929	ARSG,WIPI1,PRKAR1A
11	84388510	84588510	2.4681	56	3	0.0309464	1.50939	DLG2
7	96352743	96552743	2.46761	67	4	0.0449754	1.34702	LOC402679,FLJ34048,DLX6,DLX5,ACN9
1	14742429	14942429	2.46483	56	3	0.0313062	1.50437	RP1-21O18.1,KIAA1026
4	154861566	155061566	2.45958	72	4	0.0452097	1.34477	RNF175,SFRP2
3	158236044	158436044	2.45591	67	4	0.0454439	1.34252	FLJ16641,LEKR1,CCNL1,KRT18P34,VEPH1
18	64615890	64815890	2.45545	79	4	0.0456781	1.34029	CCDC102B
1	213142429	213342429	2.45459	71	4	0.0459124	1.33807	LOC391162,KCNK2
14	100336664	100536664	2.45415	72	4	0.0461466	1.33586	MEG3,DLK1,RTL1,LOC646590,FLJ41170
4	151061566	151261566	2.45285	60	4	0.0463809	1.33366	LOC285423,DCLK2
6	131526089	131726089	2.45129	62	4	0.0466151	1.33147	AKAP7
6	82526089	82726089	2.44893	65	4	0.0468494	1.3293	FAM46A,LOC728360
2	24614445	24814445	2.44535	37	2	0.0442708	1.35388	NCOA1
15	88243224	88443224	2.44099	60	4	0.0470836	1.32713	C15orf38,ZNF710,LOC728420,IDH2
6	9526089	9726089	2.44094	77	4	0.0473179	1.32497	OFCC1
1	80542429	80742429	2.43899	62	4	0.0475521	1.32283	LOC646526,ELTD1,LPHN2
13	113195297	113395297	2.43781	71	4	0.0477864	1.3207	TMCO3,TFDP1,ATP4B,GRK1
3	28036044	28236044	2.43058	53	3	0.0316661	1.49941	C3orf68
12	68063251	68263251	2.43005	71	4	0.0480206	1.31857	YEATS4,FRS2,CCT2
2	71614445	71814445	2.42672	79	4	0.0482549	1.31646	DYSF
18	29815890	30015890	2.42355	53	3	0.0320259	1.4945	NOL4
19	12417034	12617034	2.42017	72	4	0.0484891	1.31436	ZNF443,ZNF709,ZNF564,ZNF490,ZNF791,MAN2B1
6	131326089	131526089	2.41824	67	4	0.0487234	1.31226	EPB41L2,AKAP7
4	89861566	90061566	2.41775	64	4	0.0489576	1.31018	FAM13A1OS,FAM13A1
16	48824045	49024045	2.41693	75	4	0.0491918	1.30811	PAPD5,ADCY7,BRD7
6	170326089	170526089	2.41385	74	4	0.0494261	1.30604	DLL1,LOC154449,FAM120B
5	53111298	53311298	2.41122	77	4	0.0496603	1.30399	NDUFS4,ARL15
8	25362939	25562939	2.40627	74	4	0.0498946	1.30195	KCTD9,CDCA2
4	125461566	125661566	2.39738	46	3	0.0323858	1.48965	LOC645773,ANKRD50
3	124636044	124836044	2.39413	56	3	0.0327456	1.48485	ADCY5,LOC729223,PTPLB,MYLK
2	167814445	168014445	2.38339	54	3	0.0331054	1.4801	XIRP2,hCG_1660379
2	160014445	160214445	2.37775	43	3	0.0334653	1.47541	BAZ2B,LOC728059,LOC643072
1	193742429	193942429	2.37204	48	3	0.0338251	1.47076	KCNT2
8	49162939	49362939	2.3607	44	3	0.034185	1.46616	UBE2V2,LOC389655
11	88388510	88588510	2.34198	29	2	0.046875	1.32906	GRM5,TYR
4	174261566	174461566	2.33559	58	3	0.0345448	1.46162	GALNT7
3	138436044	138636044	2.3304	42	3	0.0349046	1.45712	NULL,IL20RB,SOX14
3	184036044	184236044	2.31749	56	3	0.0352645	1.45266	ATP11B,DCUN1D1,MCCC1
12	85663251	85863251	2.31198	46	3	0.0356243	1.44825	MGAT4C
10	26888481	27088481	2.30983	52	3	0.0359842	1.44389	APBB1IP,C10orf50,PDSS1,ABI1
5	100111298	100311298	2.30559	53	3	0.036344	1.43957	ST8SIA4
10	51488481	51688481	2.30544	20	2	0.0494792	1.30558	SLC9A3P3,FAM21A,FAM21B,ASAH2,LOC728532
5	127111298	127311298	2.29953	52	3	0.0367039	1.43529	LOC644854,CTXN3,hCG_1981531
13	110995297	111195297	2.28643	49	3	0.0370637	1.43105	C13orf16
17	43619389	43819389	2.28195	58	3	0.0374235	1.42686	SKAP1
1	80342429	80542429	2.27907	52	3	0.0377834	1.4227	LOC646526
4	32061566	32261566	2.27588	53	3	0.0381432	1.41858	LOC642305
1	43942429	44142429	2.27089	59	3	0.0385031	1.4145	JMJD2A,ST3GAL3
18	9215890	9415890	2.2694	59	3	0.0388629	1.41046	ANKRD12,LOC729437,TWSG1
11	40588510	40788510	2.26848	49	3	0.0392227	1.40646	LRRC4C
11	123188510	123388510	2.26511	46	3	0.0395826	1.4025	OR6M1,PMP22CD,OR8D4,OR4D5,OR6T1,OR10S1,OR10G4
12	85263251	85463251	2.26305	41	3	0.0399424	1.39857	MGAT4C
5	159311298	159511298	2.25325	55	3	0.0403023	1.39467	ADRA1B,TTC1,PWWP2A
7	98552743	98752743	2.24829	57	3	0.0406621	1.39081	SMURF1,KPNA7,MYH16
11	84588510	84788510	2.24225	40	3	0.041022	1.38698	DLG2,TMEM126B
12	15263251	15463251	2.23914	49	3	0.0413818	1.38319	RERG,LOC728996,PTPRO
3	65836044	66036044	2.23904	54	3	0.0417416	1.37943	MAGI1
6	74526089	74726089	2.23753	55	3	0.0421015	1.3757	CD109
7	145952743	146152743	2.22864	56	3	0.0424613	1.37201	CNTNAP2
10	84888481	85088481	2.22697	58	3	0.0428212	1.36834	LOC728027,NRG3
5	173311298	173511298	2.2239	54	3	0.043181	1.36471	CPEB4,LOC133491,HMP19
4	30461566	30661566	2.2189	48	3	0.0435408	1.3611	PCDH7
6	75926089	76126089	2.21448	54	3	0.0439007	1.35753	COL12A1,COX7A2,TMEM30A,FILIP1
6	77126089	77326089	2.20964	48	3	0.0442605	1.35398	LOC643281,IMPG1
8	68362939	68562939	2.20281	56	3	0.0446204	1.35047	ARFGEF1,CPA6
5	20911298	21111298	2.20067	45	3	0.0449802	1.34698	LOC728411,CDH12
10	100488481	100688481	2.19965	49	3	0.0453401	1.34352	HPSE2
6	77926089	78126089	2.19301	57	3	0.0456999	1.34008	HTR1B,IMPG1
2	233214445	233414445	2.18939	55	3	0.0460597	1.33668	EFHD1,TNRC15,LOC730080,LOC646973,GIGYF2,KCNJ13
17	33819389	34019389	2.18833	55	3	0.0464196	1.3333	SOCS7,ARHGAP23,SNIP
2	30014445	30214445	2.17905	56	3	0.0467794	1.32995	ALK,YPEL5
11	38988510	39188510	2.17796	41	3	0.0471393	1.32662	LOC646388,LRRC4C
5	62111298	62311298	2.17739	51	3	0.0474991	1.32331	ISCA1L
5	103711298	103911298	2.16917	44	3	0.0478589	1.32004	RAB9P1,NUDT12
13	85595297	85795297	2.16818	53	3	0.0482188	1.31678	SLITRK6
3	119436044	119636044	2.16795	45	3	0.0485786	1.31355	IGSF11
3	84036044	84236044	2.16485	41	3	0.0489385	1.31035	CADM2,LOC643665
18	31215890	31415890	2.15659	50	3	0.0492983	1.30717	ZNF396,C18orf37,LOC730071
10	89288481	89488481	2.15284	50	3	0.0496582	1.30401	MINPP1,PAPSS2

## Sheet: iHS;TIB
chromosome	start	end	statistics	snp.count	bin.lab	P value	-log10(P value)	genes
15	62318519	62518519	0.95	40	3	6.63746e-05	4.178	CSNK1G1,KIAA0101,TRIP4
10	101843306	102043306	0.649351	77	4	8.11952e-05	4.09047	CPN1,LOC644566,ERLIN1,CHUK,CWF19L1,BLOC1S2,PKD2L1
11	85808219	86008219	0.625	96	5	0.000175901	3.75473	CCDC81,ME3
3	168311759	168511759	1	37	2	0.000186289	3.72981	LOC131055,FLJ23049,ZBBX
4	144173883	144373883	1	26	2	0.000186289	3.72981	LOC729675,USP38
5	137316769	137516769	1	38	2	0.000186289	3.72981	C5orf5,WNT8A,NME5,BRD8
15	62118519	62318519	0.931818	44	3	0.000265498	3.57594	DAPK2,FAM96A,SNX1,SNX22,PPIB,CSNK1G1
14	68773931	68973931	0.58209	67	4	0.000405976	3.3915	EXDL2,GALNTL1,ERH,SLC39A9
15	62518519	62718519	0.928571	42	3	0.000464622	3.3329	TRIP4,ZNF609,GAPDHL6,LOC644934
17	39778232	39978232	0.928571	42	3	0.000464622	3.3329	GRN,MGC34829,ITGA2B,GPATCH8,FZD2
4	70373883	70573883	0.650485	103	6	0.000468165	3.3296	UGT2B4,UGT2A1
14	68373931	68573931	0.57971	69	4	0.000730757	3.13623	ACTN1,WDR22
1	229853976	230053976	0.57971	69	4	0.000730757	3.13623	DISC1,DISC2
15	67318519	67518519	0.853659	41	3	0.00086287	3.06405	GLCE,PAQR5,KIF23
2	113407690	113607690	0.590909	88	5	0.00105541	2.97658	IL1F7,IL1F9,LOC727920,LOC442042,IL1F6,IL1F8,IL1F5,IL1F10,IL1RN
4	160573883	160773883	0.840909	44	3	0.00106199	2.97388	RAPGEF2
7	95664003	95864003	0.795918	49	3	0.00126112	2.89924	SLC25A13
3	109711759	109911759	0.952381	21	2	0.00131666	2.88053	MYH15,KIAA1524,DZIP3
22	33499625	33699625	0.551282	78	4	0.00138032	2.86002	LOC646677,ISX
8	3595001	3795001	0.148438	128	7	0.001443	2.84073	CSMD1
7	95464003	95664003	0.735849	53	3	0.00146024	2.83558	DYNC1I1,SLC25A13
3	121311759	121511759	0.733333	45	3	0.00165937	2.78006	GSK3B,GPR156,LOC729134,LOC442087,LRRC58
1	45653976	45853976	0.95	20	2	0.00169345	2.77123	TESK2,LOC126661,MMACHC,PRDX1,AKR1A1,NASP
4	174373883	174573883	0.95	20	2	0.00169345	2.77123	GALNT7,LOC727929,HMGB2,SAP30,SCRG1
2	9207690	9407690	0.533333	60	4	0.0017051	2.76825	DDEF2,LOC729946
1	213053976	213253976	0.724138	58	3	0.00185849	2.73084	LOC391162,CENPF,KCNK2
1	60053976	60253976	0.536585	82	5	0.00193492	2.71334	HOOK1,CYP2J2,C1orf87
10	104443306	104643306	0.532258	62	4	0.00202988	2.69253	ARL3,SFXN2,C10orf26,CYP17A1,C10orf32,AS3MT
11	98608219	98808219	0.72093	43	3	0.00205761	2.68664	CNTN5
1	153253976	153453976	0.7	50	3	0.00225674	2.64652	ZBTB7B,DCST2,DCST1,ADAM15,EFNA4,EFNA3,EFNA1,RAG1AP1,DPM3,KRTCAP2,TRIM46,MUC1,THBS3,MTX1,GBAP
8	15395001	15595001	0.528571	70	4	0.00235466	2.62807	TUSC3
20	33739508	33939508	0.942857	35	2	0.00244703	2.61136	NFS1,C20orf52,RBM39,LOC729608,PHF20
13	56713602	56913602	0.692308	52	3	0.00245586	2.6098	LOC729250,FLJ40296,PCDH17
9	33159701	33359701	0.6875	48	3	0.00265498	2.57594	B4GALT1,SPINK4,BAG1,CHMP5,NFX1
3	103111759	103311759	0.47541	61	4	0.00267944	2.57196	NFKBIZ
5	111516769	111716769	0.47541	61	4	0.00267944	2.57196	C5orf26,SNORA13,EPB41L4A
1	12053976	12253976	0.494382	89	5	0.00281442	2.55061	TNFRSF8,TNFRSF1B,LOC390998,VPS13D
5	137116769	137316769	0.928571	28	2	0.00282382	2.54916	HNRNPA0,KLHL3,NPY6R,MYOT,PKD2L2,C5orf5
5	137516769	137716769	0.674419	43	3	0.00285411	2.54453	BRD8,KIF20A,CDC23,GFRA3,CDC25C,FAM53C
6	78946536	79146536	0.666667	48	3	0.00305323	2.51524	IRAK1BP1
4	144373883	144573883	0.9	30	2	0.00320061	2.49477	USP38,GAB1,LOC645018
12	103636818	103836818	0.658537	41	3	0.00325236	2.4878	CHST11,SLC41A2
12	39036818	39236818	0.418182	110	6	0.00327715	2.4845	LRRK2,MUC19,NULL
6	26346536	26546536	0.460526	76	4	0.003329	2.47769	HIST1H4F,HIST1H4G,HIST1H3F,HIST1H2BH,HIST1H3G,HIST1H2BI,HIST1H4H,LOC729329,BTN3A2,BTN2A2,BTN3A1,BTN2A3,BTN3A3
4	158773883	158973883	0.65	40	3	0.00345148	2.46199	LOC729937,GRIA2
10	101443306	101643306	0.888889	27	2	0.0035774	2.44643	ENTPD7,COX15,CUTC,ABCC2,DNMBP
1	171053976	171253976	0.888889	27	2	0.0035774	2.44643	LOC441915,FASLG,TNFSF18
21	43776029	43976029	0.642857	42	3	0.0036506	2.43764	HSF2BP,H2BFS,RRP1B,PDXK,NULL
11	106808219	107008219	0.454545	66	4	0.00365378	2.43726	CWF19L2,ALKBH8,ELMOD1,LOC643923
6	28346536	28546536	0.478723	94	5	0.00369393	2.43251	ZNF187,PGBD1,ZNF323,ZKSCAN3,ZSCAN12,COX11P,GPX6
1	82253976	82453976	0.634146	41	3	0.00384973	2.41457	LPHN2
9	87159701	87359701	0.451613	62	4	0.00397856	2.40027	AGTPBP1
5	52316769	52516769	0.310811	148	8	0.00403226	2.39445	ITGA2,MOCS2,LOC402214
6	79146536	79346536	0.625	48	3	0.00404885	2.39267	IRAK1BP1
21	25576029	25776029	0.62	50	3	0.00424798	2.37182	LOC284821,MRPL39,MIRN155
11	85608219	85808219	0.441176	68	4	0.00430335	2.36619	EED,C11orf73,CCDC81
4	69973883	70173883	0.875	32	2	0.00433098	2.36341	UGT2B7,UGT2B11,UGT2B28
1	144253976	144453976	0.609756	41	3	0.0044471	2.35192	ITGA10,ANKRD35,PIAS3,NUDT17,POLR3C,ZNF364,CD160,PDZK1
5	112316769	112516769	0.428571	84	5	0.00457344	2.33976	DCP2,MCC
20	46739508	46939508	0.42029	69	4	0.00462813	2.33459	PREX1,ARFGEF2
2	139807690	140007690	0.604167	48	3	0.00464622	2.3329	LOC129560,NXPH2
9	87359701	87559701	0.604167	48	3	0.00464622	2.3329	AGTPBP1
12	83636818	83836818	0.83871	31	2	0.00470777	2.32719	SLC6A15
3	157711759	157911759	0.415584	77	4	0.00495291	2.30514	KCNAB1,SSR3,LOC653801,TIPARP
16	12033586	12233586	0.6	55	3	0.00504447	2.29718	RUNDC2A,LOC92017,hCG_1983896
13	61913602	62113602	0.833333	24	2	0.00508456	2.29375	LOC647259,PCDH20
8	113395001	113595001	0.596491	57	3	0.00524359	2.28037	CSMD3
11	88008219	88208219	0.405797	69	4	0.00527769	2.27756	GRM5
15	38518519	38718519	0.595238	42	3	0.00544272	2.26418	BAHD1,CHST14,MRPL42P5,CCDC32,RPUSD2,CASC5
4	169573883	169773883	0.425	80	5	0.00545295	2.26337	DDX60L,PALLD
4	143973883	144173883	0.807692	26	2	0.00546135	2.2627	FLJ44477,INPP4B,LOC729675,USP38
10	55043306	55243306	0.39726	73	4	0.00560247	2.25162	NULL,PCDH15
4	35573883	35773883	0.59322	59	3	0.00564184	2.24858	CENTD1
4	32373883	32573883	0.8	25	2	0.00583814	2.23373	LOC642305,PCDH7
14	34773931	34973931	0.586957	46	3	0.00584097	2.23352	KIAA0391,PSMA6,LOC122589,NFKBIA
8	76595001	76795001	0.393443	61	4	0.00592725	2.22715	HNF4G
11	82608219	82808219	0.585366	41	3	0.00604009	2.21896	ANKRD42,CCDC90B,DLG2
2	102007690	102207690	0.323529	102	6	0.00608614	2.21566	IL1R2,IL1R1,IL1RL2
3	79911759	80111759	0.769231	39	2	0.00621493	2.20656	ROBO1
18	31023739	31223739	0.58	50	3	0.00623921	2.20487	ZNF397,ZNF271,ZNF24,ZNF396
15	92318519	92518519	0.383562	73	4	0.00625203	2.20398	LOC400455,MCTP2
10	29843306	30043306	0.406977	86	5	0.00633245	2.19843	SVIL
14	48373931	48573931	0.576271	59	3	0.00643834	2.19123	LOC729215,RPS29
17	10978232	11178232	0.383333	60	4	0.00657681	2.18198	FLJ45455
10	113243306	113443306	0.761905	21	2	0.00659171	2.181	ADRA2A,GPAM
11	67008219	67208219	0.566038	53	3	0.00663746	2.178	AIP,PITPNM1,CDK2AP2,CABP2,GSTP1,C11orf72,NDUFV1,LOC390213,NUDT8,TBX10,ACY3,ALDH3B2
2	26407690	26607690	0.559322	59	3	0.00683659	2.16516	SELI,C2orf39,OTOF
7	111864003	112064003	0.377049	61	4	0.00690159	2.16105	IFRD1,C7orf53,TMEM168
20	33939508	34139508	0.757576	33	2	0.0069685	2.15686	PHF20,SCAND1,C20orf152,EPB41L1
1	109853976	110053976	0.555556	45	3	0.00703571	2.15269	AMIGO1,GPR61,GNAI3,GNAT2,AMPD2,LOC441896,GSTM4,GSTM2,GSTM1,GSTM5
5	58516769	58716769	0.4	90	5	0.00721196	2.14195	PDE4D
2	46407690	46607690	0.371429	70	4	0.00722637	2.14108	EPAS1,LOC388946,ATP6V1E2
15	61918519	62118519	0.543478	46	3	0.00723483	2.14057	HERC1,DAPK2
5	117516769	117716769	0.75	36	2	0.00734529	2.13399	LOC728342,DTWD2
19	43746716	43946716	0.541667	48	3	0.00743396	2.12878	RYR1,MAP4K1,EIF3K,ACTN4,CAPN12,LGALS7
18	13023739	13223739	0.369231	65	4	0.00755115	2.12199	CEP192,LOC646203,LOC646220
4	93573883	93773883	0.534884	43	3	0.00763308	2.1173	GRID2
8	113195001	113395001	0.534884	43	3	0.00763308	2.1173	CSMD3
12	17036818	17236818	0.742857	35	2	0.00772208	2.11227	LOC387845,LMO3,LOC390297
17	29978232	30178232	0.354839	62	4	0.00787593	2.1037	TMEM132E,CCT6B
4	76973883	77173883	0.354839	62	4	0.00787593	2.1037	USO1,PPEF2,ASAHL,SDAD1,CXCL9,CXCL10,CXCL11
3	168111759	168311759	0.522727	44	3	0.00803133	2.09521	LOC131055,ZBBX
20	8539508	8739508	0.365854	82	5	0.00809147	2.09197	PLCB1
20	25339508	25539508	0.740741	27	2	0.00809887	2.09158	GINS1,RP4-691N24.1,NLP,NANP
2	16807690	17007690	0.520833	48	3	0.00823045	2.08458	FAM49A
2	166007690	166207690	0.510204	49	3	0.00842958	2.07419	SCN2A,FAM130A2
7	71064003	71264003	0.72973	37	2	0.00847566	2.07183	LOC728453,CALN1
3	142311759	142511759	0.343284	67	4	0.0085255	2.06928	SPSB4,ACPL2
4	21173883	21373883	0.343284	67	4	0.0085255	2.06928	KCNIP4,UM9(5)
13	53113602	53313602	0.509804	51	3	0.0086287	2.06405	OLFM4,RP11-365K22.1
5	136916769	137116769	0.509091	55	3	0.00882782	2.05415	SPOCK1,KLHL3,HNRNPA0
8	26995001	27195001	0.722222	36	2	0.00885245	2.05294	STMN4,TRIM35
13	102113602	102313602	0.32	100	6	0.00889513	2.05085	TPP2,LOC196541,FLJ40176,LOC643677,C13orf27,KDELC1,BIVM,ERCC5
2	179207690	179407690	0.341176	85	5	0.00897098	2.04716	TTN,CCDC141
5	157316769	157516769	0.508475	59	3	0.00902695	2.04446	LOC644198,LOC345471,CLINT1
10	73443306	73643306	0.33871	62	4	0.00917506	2.03739	CHST3,SPOCK2,ASCC1
12	9236818	9436818	0.490909	55	3	0.00922607	2.03498	PZP,LOC642846,LOC728704,LOC728715
15	50118519	50318519	0.490909	55	3	0.00922607	2.03498	MAPK6,LOC645630,BCL2L10,GNB5,MYO5C
3	12711759	12911759	0.490909	55	3	0.00922607	2.03498	TMEM40,KRT18P17,CAND2,RPL32,IQSEC1
6	46746536	46946536	0.490909	55	3	0.00922607	2.03498	SLC25A27,TDRD6,PLA2G7,MEP1A,GPR116
9	33359701	33559701	0.72	25	2	0.00922924	2.03483	NFX1,AQP7,AQP3,NOL6,ANKRD18B
13	110713602	110913602	0.333333	72	4	0.00949984	2.02228	ARHGEF7,LOC121792,C13orf16
15	70918519	71118519	0.714286	35	2	0.00960603	2.01746	LOC729686,ADPGK,NEO1
7	20664003	20864003	0.328358	67	4	0.00982462	2.00768	ABCB5,SP8,LOC222901
6	47746536	47946536	0.317073	82	5	0.00985048	2.00654	GPR111,GPR115,OPN5,C6orf138
15	38718519	38918519	0.708333	24	2	0.00998282	2.00075	CASC5,LOC729029,RAD51,FAM82C,GCHFR,LOC643338,DNAJC17,ZFYVE19,PPP1R14D
5	138916769	139116769	0.708333	24	2	0.00998282	2.00075	UBE2D2,LOC727793,CXXC5,PSD2
10	101043306	101243306	0.490566	53	3	0.0100226	1.99902	CNNM1,GOT1,NKX2-3
10	113443306	113643306	0.490566	53	3	0.0100226	1.99902	GPAM
2	214407690	214607690	0.490566	53	3	0.0100226	1.99902	SPAG16
7	7464003	7664003	0.324675	77	4	0.0101494	1.99356	COL28A1,FLJ20323,RPA3
2	28407690	28607690	0.318841	69	4	0.0104742	1.97988	BRE,FOSL2,PLB1
5	25716769	25916769	0.490196	51	3	0.0106199	1.97388	LOC729826,CDH10
8	15195001	15395001	0.313953	86	5	0.01073	1.9694	SGCZ,TUSC3
4	83173883	83373883	0.7	30	2	0.0107364	1.96914	LOC345258,HNRPD
12	38836818	39036818	0.315789	76	4	0.010799	1.96662	SLC2A13,LRRK2
4	35373883	35573883	0.488889	45	3	0.0108191	1.96581	CENTD1
12	9036818	9236818	0.487805	41	3	0.0110182	1.95789	KLRG1,LOC643996,C12orf33,A2M,PZP
18	70623739	70823739	0.695652	23	2	0.0111132	1.95416	ZNF407
5	112516769	112716769	0.311475	61	4	0.0111237	1.95375	MCC
9	111159701	111359701	0.48	50	3	0.0112173	1.95011	PTPN3,LOC402375
11	100608219	100808219	0.47619	42	3	0.0114164	1.94247	PGR,TRPC6
19	62146716	62346716	0.308824	68	4	0.0114485	1.94125	ZIM2,USP29,ZIM3
11	55808219	56008219	0.6875	32	2	0.01149	1.93968	OR8H1,OR8K3,LOC728097,SPRYD5,OR8K1,LOC390158,OR8J1,OR8U8,OR5R1,OR5M9,OR5M3,OR5M8
8	15595001	15795001	0.147059	136	7	0.011544	1.93764	TUSC3,hCG_1794003
9	103959701	104159701	0.303371	89	5	0.0116095	1.93519	GRIN3A
4	174173883	174373883	0.475	40	3	0.0116156	1.93496	GALNT17,GALNT7
7	77464003	77664003	0.268519	108	6	0.0117041	1.93166	MAGI2
13	42113602	42313602	0.307692	78	4	0.0117733	1.9291	TNFSF11,C13orf30
4	157773883	157973883	0.471698	53	3	0.0118147	1.92758	hCG_1814936,PDGFC
12	42436818	42636818	0.666667	27	2	0.0118668	1.92567	PUS7L,IRAK4,TWF1,TMEM117
14	68573931	68773931	0.666667	21	2	0.0118668	1.92567	WDR22,EXDL2
22	41499625	41699625	0.666667	21	2	0.0118668	1.92567	LOC388907,LOC391337,ARFGAP3,PACSIN2,LOC730169
1	148453976	148653976	0.466667	45	3	0.0120138	1.92032	ANP32E,CA14,APH1A,C1orf54,C1orf51,MRPS21,PRPF3,KIAA0460
4	21373883	21573883	0.466667	45	3	0.0120138	1.92032	UM9(5),KCNIP4
11	98808219	99008219	0.30137	73	4	0.0120981	1.91728	CNTN5
13	103113602	103313602	0.462963	54	3	0.0124121	1.90616	LOC728183,SLC10A2
11	61408219	61608219	0.296875	64	4	0.0124229	1.90578	FADS3,RAB3IL1,LOC728718,BEST1,FTH1,LOC399900,LOC390206,INCENP
11	123408219	123608219	0.298851	87	5	0.012489	1.90347	OR10G8,OR10G7,LOH11CR2A,OR8G2
10	55443306	55643306	0.456522	46	3	0.0126112	1.89924	PCDH15
13	71313602	71513602	0.289855	69	4	0.0127476	1.89457	DACH1
2	154207690	154407690	0.45098	51	3	0.0128103	1.89244	RPRM,GALNT13
10	64043306	64243306	0.648649	37	2	0.0129971	1.88615	ZNF365,ADO,EGR2
17	39978232	40178232	0.45	40	3	0.0130094	1.88574	FZD2,LOC728675,FLJ35848,CCDC43,DBF4B
17	45978232	46178232	0.285714	63	4	0.0130724	1.88364	SPATA20,CACNA1G,ABCC3,ANKRD40,CROP
2	154407690	154607690	0.44898	49	3	0.0132085	1.87914	GALNT13
2	67007690	67207690	0.297619	84	5	0.0133685	1.87392	LOC730200,LOC644838
10	11043306	11243306	0.641026	39	2	0.0133739	1.87374	CUGBP2,LOC439950
12	84636818	84836818	0.641026	39	2	0.0133739	1.87374	PAMCI,NTS
7	65264003	65464003	0.283784	74	4	0.0133972	1.87299	RCP9,TPST1,LOC729115
14	34573931	34773931	0.446809	47	3	0.0134077	1.87265	C14orf24,PPP2R3C,KIAA0391
13	56513602	56713602	0.439024	41	3	0.0136068	1.86624	FLJ40296,LOC729250
5	162716769	162916769	0.283333	60	4	0.013722	1.86258	CCNG1,NUDCD2,HMMR,MAT2B
8	136795001	136995001	0.283333	60	4	0.013722	1.86258	KHDRBS3
2	73007690	73207690	0.4375	48	3	0.0138059	1.85993	EMX1,SFXN5,RAB11FIP5
6	28546536	28746536	0.4375	48	3	0.0138059	1.85993	COX11P,GPX6,GPX5,ZNF452,LOC646160
7	65664003	65864003	0.638889	36	2	0.0141275	1.84993	LOC493754,KCTD7,hCG_1983332,RABGEF1
18	38423739	38623739	0.436364	55	3	0.0142042	1.84758	RIT2
2	20407690	20607690	0.296296	81	5	0.014248	1.84625	PUM2,LOC729606,RHOB,hCG_1795065
17	67978232	68178232	0.28125	64	4	0.0143715	1.8425	SLC39A11
15	76118519	76318519	0.431373	51	3	0.0144033	1.84154	TBC1D2B,hCG_38941,CIB2,IDH3A,ACSBG1
2	178807690	179007690	0.636364	33	2	0.0145043	1.8385	OSBPL6,PRKRA
2	198407690	198607690	0.636364	22	2	0.0145043	1.8385	LOC653630,PLCL1,BOLL
2	80007690	80207690	0.241379	116	6	0.0145131	1.83824	CTNNA2,LRRTM1
1	72053976	72253976	0.425532	47	3	0.0146024	1.83558	NEGR1
5	162916769	163116769	0.425532	47	3	0.0146024	1.83558	MAT2B,LOC391844
15	45518519	45718519	0.278689	61	4	0.0146963	1.83279	SEMA6D
2	125807690	126007690	0.422222	45	3	0.0150007	1.82389	CNTNAP5
11	15208219	15408219	0.274194	62	4	0.0150211	1.8233	INSC
3	114311759	114511759	0.290323	93	5	0.0151275	1.82023	C3orf17,BOC
15	65718519	65918519	0.42	50	3	0.0151998	1.81816	MAP2K5,LBXCOR1
5	144716769	144916769	0.631579	38	2	0.0152579	1.81651	PRELID2
13	68113602	68313602	0.265625	64	4	0.0153459	1.81401	LOC730239
13	68513602	68713602	0.265625	64	4	0.0153459	1.81401	LOC730239,KLHL1
5	140716769	140916769	0.416667	48	3	0.0153989	1.81251	PCDHGA4,PCDHGB2,PCDHGA5,PCDHGB3,PCDHGA6,PCDHGA7,PCDHGB4,PCDHGA8,PCDHGB5,PCDHGA9,PCDHGB6,PCDHGA10,PCDHGA11,PCDHGB8P,PCDHGA12,PCDHGC3,PCDHGC5,PCDHGC4,PCDHGA1,DIAPH1
6	120546536	120746536	0.416667	48	3	0.0153989	1.81251	LOC728727
4	105373883	105573883	0.62963	27	2	0.0156347	1.80591	CXXC4
12	108636818	108836818	0.408163	49	3	0.0157972	1.80142	C12orf34,TRPV4,GLTP,TCHP
1	82053976	82253976	0.408163	49	3	0.0157972	1.80142	LOC729831,LPHN2
18	48223739	48423739	0.264706	68	4	0.0159955	1.796	DCC
8	114795001	114995001	0.275862	87	5	0.016007	1.79569	CSMD3,hCG_1644355
13	54313602	54513602	0.621622	37	2	0.0160115	1.79557	RP11-365K22.1,OLFM4
12	113636818	113836818	0.404762	42	3	0.0161954	1.79061	TBX3
12	83436818	83636818	0.262295	61	4	0.0163202	1.78727	SLC6A15
15	71118519	71318519	0.62069	29	2	0.0163882	1.78547	NEO1
11	78208219	78408219	0.403846	52	3	0.0163945	1.7853	ODZ4,LOC729746
17	46978232	47178232	0.4	55	3	0.0165937	1.78006	LOC388401,CA10
2	108807690	109007690	0.4	50	3	0.0165937	1.78006	CCDC138,EDAR
2	192007690	192207690	0.261538	65	4	0.016645	1.77872	MYO1B,LOC729245
4	130573883	130773883	0.607143	28	2	0.016765	1.7756	LOC391697,LOC729265,C4orf33
5	138516769	138716769	0.607143	28	2	0.016765	1.7756	SIL1,MATR3,PAIP2
11	98408219	98608219	0.275	80	5	0.0168865	1.77246	CNTN5
8	11195001	11395001	0.260274	73	4	0.0169698	1.77032	MTMR9,AMAC1L2,TDH,C8orf13,BLK
10	106843306	107043306	0.396552	58	3	0.0169919	1.76976	SORCS3
16	16033586	16233586	0.395349	43	3	0.017191	1.7647	ABCC1,ABCC6
15	29118519	29318519	0.257576	66	4	0.0172946	1.76209	TRPM1,LOC283710
1	91853976	92053976	0.19	100	6	0.0173221	1.7614	HSP90B3P,TGFBR3
12	80036818	80236818	0.392857	56	3	0.0173902	1.7597	ACSS3,PPFIA2
4	158573883	158773883	0.392857	56	3	0.0173902	1.7597	GRIA2,LOC729937
2	165807690	166007690	0.605263	38	2	0.0175186	1.7565	SCN2A,LOC643397,TTC21B
3	80111759	80311759	0.605263	38	2	0.0175186	1.7565	ROBO1
5	137716769	137916769	0.253968	63	4	0.0176194	1.75401	FAM53C,JMJD1B,REEP2,EGR1,ETF1
1	239453976	239653976	0.26506	83	5	0.0177661	1.75041	RGS7
19	43546716	43746716	0.392157	51	3	0.0177884	1.74986	C19orf15,PSMD8,GGN,SPRED3,FAM98C,RASGRP4,RYR1
8	25195001	25395001	0.253165	79	4	0.0179441	1.74608	DOCK5,GNRH1,KCTD9,CDCA2
20	1139508	1339508	0.386364	44	3	0.0179875	1.74503	LOC400831,LOC642636,SNPH,SDCBP2,FKBP1A
3	137111759	137311759	0.386364	44	3	0.0179875	1.74503	PPP2R3A
19	34546716	34746716	0.25	76	4	0.0182689	1.73829	LOC284395,POP4,VSTM2B
1	229053976	229253976	0.25	68	4	0.0182689	1.73829	C1orf198,TTC13,ARV1,FAM89A,LOC644006
2	132807690	133007690	0.25	64	4	0.0182689	1.73829	LOC339742,GPR39
3	44911759	45111759	0.25	60	4	0.0182689	1.73829	TGM4,ZDHHC3,EXOSC7,CLEC3B,CDCP1
1	170853976	171053976	0.6	25	2	0.0182722	1.73821	C1orf9,FASLG,LOC441915
2	198207690	198407690	0.6	30	2	0.0182722	1.73821	RFTN2,MARS2,BOLL,LOC653630
4	18573883	18773883	0.6	30	2	0.0182722	1.73821	LOC729071,LCORL
8	112595001	112795001	0.6	35	2	0.0182722	1.73821	CSMD3
13	63313602	63513602	0.382979	47	3	0.0183858	1.73552	LOC647264,PCDH20,PCDH9
2	83607690	83807690	0.382979	47	3	0.0183858	1.73552	LOC388965,SUCLG1
5	152516769	152716769	0.382979	47	3	0.0183858	1.73552	GRIA1
11	26608219	26808219	0.258065	93	5	0.0186456	1.72942	TMEM16C,SLC5A12
1	35053976	35253976	0.380952	42	3	0.0189831	1.72163	GJA4,C1orf212,DLGAP3,LOC728260,ZMYM6,LOC653160
2	61207690	61407690	0.380952	42	3	0.0189831	1.72163	KIAA1841,LOC339804,AHSA2,USP34
15	65918519	66118519	0.38	50	3	0.0193814	1.71262	LBXCOR1,PIAS1
3	161111759	161311759	0.256098	82	5	0.0195251	1.70941	SCHIP1,IL12A,LOC730109,BRD7P2
10	81843306	82043306	0.246377	69	4	0.019568	1.70845	C10orf57,PLAC9,ANXA11,LOC642578,EIF5AL3,MAT1A
10	23243306	23443306	0.375	48	3	0.0195805	1.70818	ARMC3,MSRB2
10	58643306	58843306	0.375	40	3	0.0195805	1.70818	ZWINT,IPMK
9	101559701	101759701	0.594595	37	2	0.0197794	1.70379	NR4A3,LOC441461,STX17
4	186173883	186373883	0.246154	65	4	0.0198928	1.7013	HELT,SLC25A4,KIAA1430,LOC728525,SNX25
1	26653976	26853976	0.372093	43	3	0.0199788	1.69943	DHDDS,HMGN2,RPS6KA1,ARID1A
5	40916769	41116769	0.174757	103	6	0.0201311	1.69613	CARD6,C7,FLJ40243
15	28918519	29118519	0.59375	32	2	0.0201561	1.69559	LOC390561,MTMR15,MTMR10,TRPM1
19	42946716	43146716	0.369565	46	3	0.0201779	1.69512	ZNF573,LOC728533,LOC644554,LOC728853,WDR87,SIPA1L3
2	159207690	159407690	0.245902	61	4	0.0202176	1.69427	PKP4,DAPL1
3	168511759	168711759	0.367347	49	3	0.020377	1.69086	FLJ23049,SERPINI2,WDR49
3	64111759	64311759	0.255556	90	5	0.0204046	1.69027	PRICKLE2
10	101643306	101843306	0.592593	27	2	0.0205329	1.68755	DNMBP,CPN1
2	17207690	17407690	0.592593	27	2	0.0205329	1.68755	LOC645521,RAD51AP2,LOC388925
20	1939508	2139508	0.24359	78	4	0.0205424	1.68735	PDYN,STK35,LOC388780
10	104243306	104443306	0.365385	52	3	0.0205761	1.68664	ACTR1A,SUFU,TRIM8,ARL3
11	67808219	68008219	0.365385	52	3	0.0205761	1.68664	C11orf24,LRP5,LOC729271,SAPS3
1	214053976	214253976	0.242857	70	4	0.0208672	1.68054	USH2A
10	36043306	36243306	0.363636	55	3	0.0209744	1.67831	LOC439954,GJD4
16	19833586	20033586	0.363636	44	3	0.0209744	1.67831	GPRC5B,GPR139
20	21539508	21739508	0.363636	44	3	0.0209744	1.67831	PAX1
20	47139508	47339508	0.363636	44	3	0.0209744	1.67831	CSE1L,STAU1,DDX27,ZNFX1,SNORD12
11	57608219	57808219	0.235294	68	4	0.0211919	1.67383	OR9I1,OR9Q1,OR9Q2,OR1S2,OR1S1,OR10Q1,OR10W1,LOC399898
12	13436818	13636818	0.247191	89	5	0.0212841	1.67195	C12orf36,GRIN2B
5	88116769	88316769	0.589744	39	2	0.0212865	1.6719	MEF2C
18	30823739	31023739	0.234375	64	4	0.0215167	1.66722	MAPRE2
9	84559701	84759701	0.234375	64	4	0.0215167	1.66722	RASEF
9	3959701	4159701	0.139344	122	7	0.021645	1.66464	GLIS3
20	41539508	41739508	0.588235	34	2	0.0216633	1.66428	SFRS6,L3MBTL,SGK2,IFT52,MYBL2
1	78253976	78453976	0.361702	47	3	0.0217709	1.66212	DNAJB4,GIPC2,LOC729768
21	35576029	35776029	0.357143	56	3	0.02197	1.65817	RUNX1
2	28607690	28807690	0.357143	56	3	0.02197	1.65817	PLB1,PPP1CB
10	114243306	114443306	0.583333	36	2	0.0220401	1.65679	VTI1A
11	123208219	123408219	0.243902	82	5	0.0221636	1.65436	OR6M1,PMP22CD,OR8D4,OR4D5,OR6T1,OR10S1,OR10G4,OR10G9,OR10G8
7	47064003	47264003	0.233766	77	4	0.0221663	1.65431	tcag7.956,TNS3
7	107464003	107664003	0.355556	45	3	0.0223682	1.65037	LAMB4,NRCAM
10	106243306	106443306	0.578947	38	2	0.0224169	1.64942	CCDC147,SORCS3
1	177853976	178053976	0.233333	60	4	0.0224911	1.64799	TDRD5,LOC730113,C1orf76
12	120836818	121036818	0.352941	51	3	0.0225674	1.64652	PSMD9,WDR66,BCL7A,NULL
17	11178232	11378232	0.348837	43	3	0.0227665	1.6427	FLJ45455
3	101311759	101511759	0.348837	43	3	0.0227665	1.6427	FILIP1L,C3orf26,TMEM30C,LOC391559,TBC1D23
5	87916769	88116769	0.571429	35	2	0.0227937	1.64219	LOC645323,MEF2C
3	13711759	13911759	0.230769	65	4	0.0228158	1.64176	FBLN2,WNT7A
7	37864003	38064003	0.165138	109	6	0.0229401	1.63941	TXNDC3,SFRP4,EPDR1
5	65916769	66116769	0.218391	87	5	0.0230431	1.63746	MAST4
10	77843306	78043306	0.229508	61	4	0.0231406	1.63562	C10orf11,LOC729716
2	24807690	25007690	0.347826	46	3	0.0231647	1.63517	NCOA1,LOC391356,CENPO,ADCY3,LOC729714
12	80636818	80836818	0.567568	37	2	0.0231705	1.63507	PPFIA2
12	58436818	58636818	0.346154	52	3	0.0233639	1.63146	SLC16A7,LOC390335
3	25511759	25711759	0.227848	79	4	0.0234654	1.62957	RARB,TOP2B
5	118516769	118716769	0.566667	30	2	0.0235473	1.62806	DMXL1,TNFAIP8
8	31795001	31995001	0.341463	41	3	0.023563	1.62777	NULL,NRG1
10	75043306	75243306	0.340426	47	3	0.0237621	1.62411	MYOZ1,SYNPO2L,CTGLF2,LOC729096,SEC24C,FUT11,CHCHD1,NULL,KIAA0913,NDST2,CAMK2G
14	65373931	65573931	0.222222	72	4	0.0237902	1.6236	LOC646362,LOC729850,FUT8
10	2443306	2643306	0.216867	83	5	0.0239226	1.62119	LOC727878,PFKP
1	45453976	45653976	0.558824	34	2	0.023924	1.62117	ZSWIM5,LOC400752,HPDL,MUTYH,TOE1,TESK2
17	53578232	53778232	0.339623	53	3	0.0239612	1.62049	OR4D1,EPX,MSX2P1,OR4D2,MKS1,LPO,MPO,BZRAP1,SUPT4H1
19	34746716	34946716	0.220779	77	4	0.024115	1.61771	VSTM2B,POP4,LOC727974,PLEKHF1,C19orf12,CCNE1
11	75008219	75208219	0.338983	59	3	0.0241604	1.6169	MAP6,MOGAT2,DGAT2,UVRAG
12	2036818	2236818	0.338983	59	3	0.0241604	1.6169	CACNA1C
3	108711759	108911759	0.551724	29	2	0.0243008	1.61438	BBX
1	110053976	110253976	0.220588	68	4	0.0244398	1.6119	GSTM5,GSTM3,EPS8L3,CSF1
10	100843306	101043306	0.333333	42	3	0.0245586	1.6098	HPSE2,CNNM1
17	43578232	43778232	0.333333	48	3	0.0245586	1.6098	SKAP1
4	130773883	130973883	0.333333	45	3	0.0245586	1.6098	LOC729265
6	139546536	139746536	0.333333	42	3	0.0245586	1.6098	HECA,TXLNB,CITED2
7	115264003	115464003	0.333333	45	3	0.0245586	1.6098	TFEC
20	21339508	21539508	0.55	20	2	0.0246776	1.6077	NKX2-4,NKX2-2
18	44423739	44623739	0.216216	74	4	0.0247645	1.60617	KIAA0427
18	69023739	69223739	0.214286	84	5	0.0248021	1.60551	NETO1
10	112843306	113043306	0.545455	22	2	0.0250544	1.60112	ADRA2A,SHOC2
7	101464003	101664003	0.545455	22	2	0.0250544	1.60112	CUX1
2	19407690	19607690	0.215385	65	4	0.0250893	1.60051	OSR1
6	70746536	70946536	0.212121	66	4	0.0254141	1.59493	COL19A1
4	21573883	21773883	0.327586	58	3	0.0255542	1.59254	UM9(5),GPR125
16	54033586	54233586	0.2125	80	5	0.0256816	1.59038	MMP2,LPCAT2,CAPNS2,SLC6A2
11	127608219	127808219	0.211268	71	4	0.0257389	1.58941	ETS1
15	91318519	91518519	0.15	100	6	0.0257491	1.58924	CHD2,RGMA,UNQ9370
7	82664003	82864003	0.327273	55	3	0.0257534	1.58917	PCLO,SEMA3E
3	167911759	168111759	0.540541	37	2	0.025808	1.58825	LOC389173,ZBBX,LOC131055
11	57808219	58008219	0.326923	52	3	0.0259525	1.58582	LOC399898,OR5B17,OR9Q1,OR5B3,OR5B2,OR5B12,OR5B21
2	213207690	213407690	0.326923	52	3	0.0259525	1.58582	LOC729699,hCG_1645016
15	29518519	29718519	0.209677	62	4	0.0260637	1.58396	LOC400347,OTUD7A
17	53178232	53378232	0.209677	62	4	0.0260637	1.58396	MSI2,MRPS23,CUEDC1,LOC729465,VEZF1
4	159173883	159373883	0.535714	28	2	0.0261848	1.58195	C4orf18,TMEM144
6	120346536	120546536	0.535714	28	2	0.0261848	1.58195	LOC728727,MAN1A1
3	43111759	43311759	0.326531	49	3	0.0263507	1.57921	C3orf39,SNRK
1	166053976	166253976	0.326087	46	3	0.0265498	1.57594	SAC,BRP44,IQWD1
7	115464003	115664003	0.326087	46	3	0.0265498	1.57594	TFEC,TES
2	102207690	102407690	0.2	80	5	0.0265611	1.57575	IL1RL2,IL1RL1,IL18R1,LOC442035,IL18RAP
3	10511759	10711759	0.2	90	5	0.0265611	1.57575	ATP2B2,SLC6A11
6	4946536	5146536	0.2	85	5	0.0265611	1.57575	RPP40,LOC442155,LYRM4
9	15959701	16159701	0.2	80	5	0.0265611	1.57575	C9orf93
2	207607690	207807690	0.208955	67	4	0.0267132	1.57327	KLF7,LOC729607
2	17407690	17607690	0.527778	36	2	0.0269384	1.56963	LOC388925,RAD51AP2,VSNL1
9	127559701	127759701	0.527778	36	2	0.0269384	1.56963	PBX3
20	46939508	47139508	0.325581	43	3	0.0269481	1.56947	ARFGEF2,CSE1L
13	39913602	40113602	0.208333	72	4	0.027038	1.56803	LOC646982,FOXO1
2	19607690	19807690	0.320755	53	3	0.0271472	1.56627	OSR1,TTC32
6	83546536	83746536	0.320755	53	3	0.0271472	1.56627	UBE2CBP
6	158946536	159146536	0.203125	64	4	0.0273628	1.56284	TMEM181,DYNLT1,SYTL3,EZR
8	12995001	13195001	0.203125	64	4	0.0273628	1.56284	DLC1
2	122807690	123007690	0.32	50	3	0.0275455	1.55995	LOC728241,TSN
5	85316769	85516769	0.32	50	3	0.0275455	1.55995	NBPF22P,COX7C
2	24607690	24807690	0.52	25	2	0.0276919	1.55765	NCOA1
17	43778232	43978232	0.318182	44	3	0.0279437	1.55372	SKAP1,HOXB1,HOXB2
4	94173883	94373883	0.318182	44	3	0.0279437	1.55372	GRID2
19	17146716	17346716	0.202532	79	4	0.0280123	1.55265	MYO9B,USE1,OCEL1,NR2F6,USHBP1,C19orf62,ANKRD41,ABHD8,MRPL34,DDA1,TMEM16H,GTPBP3,PLVAP
5	50916769	51116769	0.518519	27	2	0.0280687	1.55178	ISL1
17	34178232	34378232	0.197183	71	4	0.0283371	1.54764	PIP4K2B,CCDC49,LOC388381,RPL23,LASP1,FBXO47
10	89843306	90043306	0.315789	57	3	0.028342	1.54757	PTEN,C10orf59
13	54113602	54313602	0.517241	29	2	0.0284455	1.54599	RP11-365K22.1,OLFM4
2	58607690	58807690	0.517241	29	2	0.0284455	1.54599	hCG_15200
13	73513602	73713602	0.314815	54	3	0.0285411	1.54453	KLF12,LOC730245
3	65111759	65311759	0.135135	111	6	0.0285581	1.54427	MAGI1
15	57918519	58118519	0.194805	77	4	0.0286619	1.54269	BNIP2,FOXB1
6	66546536	66746536	0.194805	77	4	0.0286619	1.54269	LOC442229,RCADH5,EGFL11
11	40608219	40808219	0.313725	51	3	0.0287402	1.54151	LRRC4C
15	38318519	38518519	0.313725	51	3	0.0287402	1.54151	PAK6,C15orf56,PLCB2,LOC390578,C15orf52,LOC644844,DISP2,C15orf23,IVD,BAHD1
5	85516769	85716769	0.309524	42	3	0.0291385	1.53553	NBPF22P,COX7C
5	147116769	147316769	0.309524	42	3	0.0291385	1.53553	JAKMIP2,SPINK1,SCGB3A2,MGC23985
11	25208219	25408219	0.515152	33	2	0.0291991	1.53463	LUZP2
13	102913602	103113602	0.193548	62	4	0.0293115	1.53296	LOC728183,SLC10A2
3	162511759	162711759	0.193548	62	4	0.0293115	1.53296	LOC646085,C3orf57,hCG_16001,LOC131149
3	109911759	110111759	0.306122	49	3	0.0295367	1.52964	DZIP3,RETNLB,TRAT1,GUCA1C
3	56511759	56711759	0.512821	39	2	0.0295759	1.52906	ERC2,CCDC66,C3orf63,ARHGEF3
11	78008219	78208219	0.305085	59	3	0.0297358	1.52672	NARS2,ODZ4
10	19043306	19243306	0.303571	56	3	0.029935	1.52382	LOC645120,ARL5B
2	25207690	25407690	0.303571	56	3	0.029935	1.52382	EFR3B,POMC,LOC729734,DNMT3A,LOC729741
3	57911759	58111759	0.303571	56	3	0.029935	1.52382	SLMAP,FLNB
12	42636818	42836818	0.5	26	2	0.0299527	1.52356	TMEM117
2	86607690	86807690	0.5	28	2	0.0299527	1.52356	VPS24,RNF103,RMND5A
2	192207690	192407690	0.5	26	2	0.0299527	1.52356	LOC729245,OBFC2A,hCG_2045843,SDPR
5	88316769	88516769	0.5	30	2	0.0299527	1.52356	MEF2C
5	116516769	116716769	0.5	36	2	0.0299527	1.52356	LOC728342
5	152316769	152516769	0.5	32	2	0.0299527	1.52356	GRIA1
8	12595001	12795001	0.191781	73	4	0.029961	1.52344	LOC442381,LONRF1,NULL
15	72318519	72518519	0.193878	98	5	0.0300792	1.52173	LOC729740,CCDC33,CYP11A1,LOC729739,SEMA7A
1	31453976	31653976	0.191176	68	4	0.0302858	1.51876	NKAIN1,WDR57,ZCCHC17,FABP3,SERINC2
3	86911759	87111759	0.301887	53	3	0.0305323	1.51524	VGLL3
9	95359701	95559701	0.301887	53	3	0.0305323	1.51524	FAM120A,PHF2
11	60208219	60408219	0.190476	63	4	0.0306106	1.51413	NULL,MS4A8B,LOC728588,MS4A15,LOC728596,MS4A10,CCDC86,GPR44,ZP1
3	152311759	152511759	0.190476	63	4	0.0306106	1.51413	MED12L,GPR171,P2RY14,GPR87
1	64053976	64253976	0.3	40	3	0.0309306	1.50961	ROR1
4	18973883	19173883	0.3	40	3	0.0309306	1.50961	LOC645174,SLIT2
22	47499625	47699625	0.190476	84	5	0.0309587	1.50922	FAM19A5
8	135395001	135595001	0.189189	74	4	0.0312601	1.50501	LOC729395,ZFAT1,ZFAT
9	116959701	117159701	0.189189	74	4	0.0312601	1.50501	1-Dec,39783
6	66746536	66946536	0.297872	47	3	0.0313288	1.50406	RCADH5,EGFL11
7	65064003	65264003	0.297872	47	3	0.0313288	1.50406	GUSB,hCG_1793610,ASL,RCP9
8	51195001	51395001	0.297872	47	3	0.0313288	1.50406	SNTG1
9	116759701	116959701	0.134615	104	6	0.031367	1.50353	TNFSF8,TNC,1-Dec
7	26464003	26664003	0.124031	129	7	0.031746	1.49831	SNX10,LOC285941
18	21623739	21823739	0.184783	92	5	0.0318382	1.49705	SS18
2	207407690	207607690	0.188406	69	4	0.0319097	1.49608	FASTKD2,CPO,KLF7
3	128911759	129111759	0.188406	69	4	0.0319097	1.49608	MGLL,KLHDC6
2	177007690	177207690	0.296296	54	3	0.0319262	1.49585	LOC728884,LOC375295,MTX2
15	71318519	71518519	0.295455	44	3	0.0321253	1.49315	NEO1,HCN4,LOC729965,LOC283677
3	109511759	109711759	0.295455	44	3	0.0321253	1.49315	HHLA2,MYH15
8	112795001	112995001	0.487179	39	2	0.0322134	1.49196	CSMD3
8	10995001	11195001	0.293103	58	3	0.0325236	1.4878	C8orf15,C8orf16,XKR6,LOC392193,MTMR9
1	229253976	229453976	0.1875	64	4	0.0325593	1.48733	FAM89A,TRIM67,FLJ30430,C1orf131,GNPAT
10	107043306	107243306	0.486486	37	2	0.0325902	1.48691	SORCS3
2	61407690	61607690	0.486486	37	2	0.0325902	1.48691	USP34,LOC647074,XPO1
2	113607690	113807690	0.182927	82	5	0.0327177	1.48522	IL1RN,PSD4,PAX8
15	61318519	61518519	0.288462	52	3	0.0327227	1.48515	RAB8B,APH1B,CA12
2	190007690	190207690	0.288462	52	3	0.0327227	1.48515	WDR75,SLC40A1,LOC729174
17	73778232	73978232	0.185714	70	4	0.0328841	1.48301	THA1P,SOCS3,PGS1,DNAH17
1	10853976	11053976	0.185714	70	4	0.0328841	1.48301	C1orf127,LOC390996,TARDBP,MASP2,SRM,EXOSC10
9	118159701	118359701	0.185714	70	4	0.0328841	1.48301	PAPPA,ASTN2
10	82843306	83043306	0.285714	42	3	0.0331209	1.4799	LOC389990,SH2D4B
13	70113602	70313602	0.285714	56	3	0.0331209	1.4799	LOC647277
1	37053976	37253976	0.285714	42	3	0.0331209	1.4799	GRIK3
2	175207690	175407690	0.285714	49	3	0.0331209	1.4799	WIPF1,LOC440926,CHRNA1,CHN1
5	153116769	153316769	0.285714	42	3	0.0331209	1.4799	GRIA1,C5orf3
6	4746536	4946536	0.285714	56	3	0.0331209	1.4799	CDYL,RPP40
6	9546536	9746536	0.285714	49	3	0.0331209	1.4799	OFCC1
3	142511759	142711759	0.485714	35	2	0.0333438	1.47699	ACPL2,ZBTB38,KRT18P35,RASA2
1	85653976	85853976	0.178947	95	5	0.0335972	1.4737	DDAH1,CYR61
15	38918519	39118519	0.484848	33	2	0.0337206	1.47211	SPINT1,RHOV,VPS18,DLL4,CHAC1,INOC1
1	210653976	210853976	0.184211	76	4	0.0338584	1.47033	C1orf75,TMEM206,NENF,ATF3
1	189653976	189853976	0.483871	31	2	0.0340974	1.46728	RGS18
9	77959701	78159701	0.133333	105	6	0.034176	1.46628	PCSK5,RFK
6	86946536	87146536	0.183333	60	4	0.0341832	1.46619	LOC643916,LOC643926
13	84913602	85113602	0.48	25	2	0.0344742	1.46251	SLITRK6
11	125608219	125808219	0.173913	92	5	0.0344767	1.46247	FAM118B,SRPR,FOXRED1,TIRAP,DCPS,ST3GAL4,KIRREL3
12	9636818	9836818	0.180556	72	4	0.034508	1.46208	KLRB1,LOC644138,LOC374443,CLEC2D,CLECL1,CD69,LOC644170
8	55395001	55595001	0.180556	72	4	0.034508	1.46208	LOC729038,SOX17,LOC392222,SEC11B
7	96264003	96464003	0.283019	53	3	0.0345148	1.46199	LOC402679
10	100243306	100443306	0.28	50	3	0.0347139	1.4595	HPSE2
11	114808219	115008219	0.472222	36	2	0.0348509	1.45779	CADM1,LOC283143
12	1236818	1436818	0.27907	43	3	0.034913	1.45701	ERC1
9	120559701	120759701	0.27907	43	3	0.034913	1.45701	LOC442434
11	82808219	83008219	0.180328	61	4	0.0351575	1.45398	DLG2
7	89464003	89664003	0.180328	61	4	0.0351575	1.45398	DPY19L2P4,STEAP1,STEAP2
4	135173883	135373883	0.464286	28	2	0.0352277	1.45312	LOC132430,PABPC4L
8	55595001	55795001	0.275862	58	3	0.0353113	1.45209	SEC11B,RP1
3	62511759	62711759	0.171717	99	5	0.0353562	1.45153	CADPS
14	45373931	45573931	0.27451	51	3	0.0355104	1.44964	LOC729276,C14orf106
18	31223739	31423739	0.459459	37	2	0.0356045	1.44849	ZNF396,C18orf37,LOC730071
2	165607690	165807690	0.272727	44	3	0.0357095	1.44722	SCN3A,SCN2A
20	11139508	11339508	0.178082	73	4	0.0358071	1.44603	hCG_2045828,LOC441940,BTBD3
14	63973931	64173931	0.271186	59	3	0.0359087	1.4448	MTHFD1,AKAP5,ZBTB25,ZBTB1,HSPA2,C14orf50
4	105573883	105773883	0.271186	59	3	0.0359087	1.4448	CXXC4,LOC728847
6	75946536	76146536	0.457143	35	2	0.0359813	1.44392	COL12A1,COX7A2,TMEM30A,FILIP1
2	108207690	108407690	0.177419	62	4	0.0361319	1.44211	SULT1C3,SULT1C2,LOC151234,SULT1C4,GCC2
9	72559701	72759701	0.170455	88	5	0.0362357	1.44086	TRPM3
6	31546536	31746536	0.277027	148	8	0.0362903	1.44021	3.8-1,MICB,MCCD1,BAT1,ATP6V1G2,NFKBIL1,LTA,TNF,LTB,LST1,NCR3,AIF1,BAT2,SNORA38,BAT3,APOM,C6orf47,BAT4,CSNK2B
21	27976029	28176029	0.270833	48	3	0.0363069	1.44001	C21orf94,ADAMTS5
16	78233586	78433586	0.451613	31	2	0.0363581	1.4394	MAF,LOC440389
2	140007690	140207690	0.451613	31	2	0.0363581	1.4394	LOC129560,LRP1B
1	63853976	64053976	0.175676	74	4	0.0364566	1.43822	PGM1,LOC646051,ROR1
8	10795001	10995001	0.269231	52	3	0.036506	1.43764	XKR6,C8orf15
14	34173931	34373931	0.267857	56	3	0.0367052	1.43527	SNX6,RPL23AP9,CFL2,RPL12P6,BAZ1A
5	140516769	140716769	0.267857	56	3	0.0367052	1.43527	PCDHB17,PCDHB7,PCDHB8,PCDHA8,PCDHB16,PCDHB9,PCDHB10,PCDHB11,PCDHB12,PCDHB13,PCDHB14,PCDHB18,PCDHB19P,PCDHB15,SLC25A2,TAF7,PCDHGC5,PCDHGA1,PCDHGA2,PCDHGA3,PCDHGB1,PCDHGA4
1	92053976	92253976	0.174603	63	4	0.0367814	1.43437	TGFBR3,BRDT
6	111946536	112146536	0.174603	63	4	0.0367814	1.43437	LOC643749,TRAF3IP2,FYN
2	54807690	55007690	0.128713	101	6	0.036985	1.43197	SPTBN1,FLJ42562
1	205253976	205453976	0.266667	45	3	0.0371034	1.43059	C1orf116,YOD1,PFKFB2,C4BPB,C4BPA,C4BPAL1
20	11339508	11539508	0.266667	45	3	0.0371034	1.43059	LOC441940,BTBD3
10	10643306	10843306	0.45	20	2	0.0371117	1.43049	TCEB1P3,CUGBP2
1	175253976	175453976	0.45	20	2	0.0371117	1.43049	ASTN1,FAM5B
10	96643306	96843306	0.164835	91	5	0.0371152	1.43045	CYP2C9,CYP2C8
22	41299625	41499625	0.173333	75	4	0.037431	1.42677	dJ222E13.2,POLDIP3,CYB5R3,A4GALT,LOC388907
5	13316769	13516769	0.265306	49	3	0.0375017	1.42595	LOC391738,DNAH5
6	84146536	84346536	0.263158	57	3	0.0377008	1.42365	ME1,PRSS35,SNAP91
13	68313602	68513602	0.171875	64	4	0.0377558	1.42302	LOC730239,KLHL1
2	219207690	219407690	0.171875	64	4	0.0377558	1.42302	PLCD4,ZNF142,BCS1L,RNF25,STK36,TTLL4,CYP27A1,PRKAG3
4	10573883	10773883	0.171875	64	4	0.0377558	1.42302	MIST,LOC643446
12	1036818	1236818	0.447368	38	2	0.0378653	1.42176	ERC1
13	61713602	61913602	0.261905	42	3	0.0378999	1.42136	LOC647259,PCDH20
14	45973931	46173931	0.261905	42	3	0.0378999	1.42136	RPL10L,MDGA2
18	65623739	65823739	0.261905	42	3	0.0378999	1.42136	DOK6,CD226,RTTN
11	74808219	75008219	0.164706	85	5	0.0379947	1.42028	FLJ33790,GDPD5,LOC729643,SERPINH1,MAP6
2	29207690	29407690	0.164706	85	5	0.0379947	1.42028	CLIP4,ALK
10	23043306	23243306	0.444444	36	2	0.0382421	1.41746	PIP4K2A,ARMC3
5	117716769	117916769	0.444444	36	2	0.0382421	1.41746	DTWD2
1	11253976	11453976	0.26087	46	3	0.0384973	1.41457	UBIAD1,PTCHD2
22	41699625	41899625	0.26087	46	3	0.0384973	1.41457	LOC730169,TTLL1,BIK,MCAT,TSPO,TTLL12
14	52773931	52973931	0.171429	70	4	0.0387301	1.41195	DDHD1
7	47264003	47464003	0.171429	70	4	0.0387301	1.41195	TNS3
20	32539508	32739508	0.259259	54	3	0.0388955	1.4101	ITCH,DYNLRB1,MAP1LC3A,PIGU
20	56939508	57139508	0.259259	54	3	0.0388955	1.4101	GNAS,TH1L,CTSZ,LOC729181,TUBB1,ATP5E,SLMO2,C20orf174
6	51746536	51946536	0.259259	54	3	0.0388955	1.4101	PKHD1
1	171253976	171453976	0.4375	32	2	0.0389956	1.40898	TNFSF18,LOC391139,TNFSF4
4	93373883	93573883	0.4375	32	2	0.0389956	1.40898	LOC133083,GRID2
8	125995001	126195001	0.169231	65	4	0.0393797	1.40473	ZNF572,SQLE,KIAA0196,NSMCE2
8	136995001	137195001	0.258621	58	3	0.0394929	1.40348	KHDRBS3
10	75443306	75643306	0.255814	43	3	0.039692	1.4013	VCL,AP3M1,ADK
1	118053976	118253976	0.255814	43	3	0.039692	1.4013	LOC401959,GDAP2
6	14946536	15146536	0.255814	43	3	0.039692	1.4013	LOC728961,JARID2
12	24436818	24636818	0.169014	71	4	0.0397044	1.40116	SOX5,FLJ32894
17	45578232	45778232	0.169014	71	4	0.0397044	1.40116	PPP1R9B,SGCA,HILS1,COL1A1,LOC729160,TMEM92,XYLT2
4	174573883	174773883	0.435897	39	2	0.0397492	1.40067	SCRG1,HAND2,NBLA00301,MORF4
4	118573883	118773883	0.163043	92	5	0.0397537	1.40062	TRAM1L1,NDST3
11	5208219	5408219	0.117647	119	6	0.039794	1.40018	HBD,HBBP1,HBG1,HBG2,HBE1,OR51B4,OR51B2,OR51B5,OR51B6,LOC643745,LOC643753,OR51M1,OR51Q1
7	134064003	134264003	0.117647	102	6	0.039794	1.40018	CALD1
13	60313602	60513602	0.434783	23	2	0.040126	1.39657	LOC390407,PCDH20
6	74146536	74346536	0.255319	47	3	0.0402894	1.39481	DDX43,C6orf150,MTO1,EEF1A1,SLC17A5
3	7511759	7711759	0.168831	77	4	0.040354	1.39411	GRM7
8	12795001	12995001	0.168831	77	4	0.040354	1.39411	NULL,C8orf79,DLC1
11	100008219	100208219	0.254902	51	3	0.0404885	1.39267	LOC440063,CNTN5,FLJ32810
12	71636818	71836818	0.254902	51	3	0.0404885	1.39267	TRHDE
13	77313602	77513602	0.428571	28	2	0.0405028	1.39252	EDNRB
15	76518519	76718519	0.428571	35	2	0.0405028	1.39252	IREB2,LOC123688,PSMA4,CHRNA5,CHRNA3,CHRNB4
12	38636818	38836818	0.1625	80	5	0.0406332	1.39112	SLC2A13
7	4264003	4464003	0.1625	80	5	0.0406332	1.39112	SDK1
3	122711759	122911759	0.254237	59	3	0.0408868	1.38842	POLQ,ARGFX,FBXO40,HCLS1,GOLGB1
2	59207690	59407690	0.166667	60	4	0.0410036	1.38718	LOC730134,LOC647038
2	66807690	67007690	0.166667	78	4	0.0410036	1.38718	LOC730200,MEIS1
2	202407690	202607690	0.166667	60	4	0.0410036	1.38718	PFTK2,LOC729487
3	54711759	54911759	0.166667	60	4	0.0410036	1.38718	CACNA2D3
11	14408219	14608219	0.25	44	3	0.0410859	1.38631	LOC401676,COPB1,PSMA1
14	48573931	48773931	0.25	44	3	0.0410859	1.38631	LOC729215,RPS29
1	162653976	162853976	0.25	56	3	0.0410859	1.38631	LOC729952,PBX1
21	16176029	16376029	0.25	40	3	0.0410859	1.38631	USP25,C21orf34
2	83807690	84007690	0.25	40	3	0.0410859	1.38631	LOC388965,SUCLG1
4	34373883	34573883	0.25	52	3	0.0410859	1.38631	LOC727819,LOC727823
6	15346536	15546536	0.25	48	3	0.0410859	1.38631	JARID2
1	36853976	37053976	0.424242	33	2	0.0412564	1.38451	CSF3R,GRIK3
8	49395001	49595001	0.423077	26	2	0.0416332	1.38056	LOC389655,EFCAB1,FLJ46365
6	36746536	36946536	0.120968	124	7	0.041847	1.37834	LOC389386,CDKN1A,FLJ43093,CPNE5,PPIL1
10	63843306	64043306	0.416667	36	2	0.04201	1.37665	ZNF365
10	9243306	9443306	0.164384	73	4	0.0423027	1.37363	LOC389936,GATA3
8	112995001	113195001	0.413793	29	2	0.0423867	1.37277	CSMD3
20	14939508	15139508	0.159574	94	5	0.0423923	1.37271	MACROD2
14	34373931	34573931	0.245614	57	3	0.0424798	1.37182	BAZ1A,C14orf19,SRP54
6	167146536	167346536	0.164179	67	4	0.0426275	1.37031	RPS6KA2,RNASET2,FGFR1OP
12	72236818	72436818	0.244444	45	3	0.0426789	1.36979	LOC645654,TRHDE
6	74946536	75146536	0.244444	45	3	0.0426789	1.36979	CD109
7	126464003	126664003	0.244444	45	3	0.0426789	1.36979	GRM8
19	47746716	47946716	0.4	20	2	0.0427635	1.36893	CEACAM1,CEACAM8,PSG3
2	125607690	125807690	0.4	25	2	0.0427635	1.36893	CNTNAP5
7	107864003	108064003	0.4	20	2	0.0427635	1.36893	LOC730047,PNPLA8,THAP5,DNAJB9
16	62233586	62433586	0.163934	61	4	0.0429523	1.36701	hCG_1642987,CDH11,LOC729217
19	45546716	45746716	0.163934	61	4	0.0429523	1.36701	PLD3,HIPK4,PRX,SERTAD1,SERTAD3,BLVRB,SPTBN4
1	201853976	202053976	0.163934	61	4	0.0429523	1.36701	ATP2B4,SNORA77,LAX1,ZC3H11A,LOC647252
3	120511759	120711759	0.163934	61	4	0.0429523	1.36701	CDGAP,TMEM39A,KTELC1,C3orf1
3	158511759	158711759	0.163934	61	4	0.0429523	1.36701	VEPH1,PTX3
5	146916769	147116769	0.163934	61	4	0.0429523	1.36701	JAKMIP2
5	37916769	38116769	0.159091	88	5	0.0432718	1.3638	GDNF,EGFLAM
2	145407690	145607690	0.243902	41	3	0.0432763	1.36375	LOC730124,ZEB2
6	120146536	120346536	0.24	50	3	0.0434754	1.36176	LOC728727,MAN1A1
7	142064003	142264003	0.24	50	3	0.0434754	1.36176	TRBVA,TRBV26,TRBVB,TRBV27,TRBV28,TRBV29-1,PRSS1,TRY6,PRSS2,TRBD1,TRBJ1-6,TRBJ2-7,TRBC2,TRBV30,EPHB6
12	120636818	120836818	0.23913	46	3	0.0438736	1.3578	MORN3,RHOF,TMEM120B,LOC338799,SETD1B,HPD,PSMD9
5	118716769	118916769	0.23913	46	3	0.0438736	1.3578	TNFAIP8,HSD17B4
3	121911759	122111759	0.394737	38	2	0.0438939	1.3576	RABL3,GTF2E1,STXBP5L
10	90843306	91043306	0.155556	90	5	0.0441513	1.35506	LOC728303,CH25H,LIPA,IFIT2
10	75843306	76043306	0.387097	31	2	0.0442707	1.35388	LOC729142,ADK
12	85036818	85236818	0.387097	31	2	0.0442707	1.35388	MGAT4C
2	163807690	164007690	0.387097	31	2	0.0442707	1.35388	FIGN,KCNH7
10	29643306	29843306	0.238095	42	3	0.0442719	1.35387	LYZL1,LOC387647,SVIL
9	123359701	123559701	0.238095	42	3	0.0442719	1.35387	NULL,DAB2IP
1	166653976	166853976	0.237288	59	3	0.0446701	1.34998	LOC730016,XCL2,XCL1
5	64916769	65116769	0.237288	59	3	0.0446701	1.34998	PPWD1,TRIM23,FLJ13611,NULL,SGTB,NLN
6	47346536	47546536	0.237288	59	3	0.0446701	1.34998	TNFRSF21,CD2AP
12	130036818	130236818	0.161765	68	4	0.0449009	1.34774	GPR133,LOC116437
1	10253976	10453976	0.161765	68	4	0.0449009	1.34774	KIF1B,PGD,APITD1,CORT,DFFA
12	1436818	1636818	0.154762	84	5	0.0450308	1.34649	ERC1,FBXL14,WNT5B
16	12233586	12433586	0.236364	55	3	0.0452675	1.34421	LOC92017
7	99464003	99664003	0.236364	55	3	0.0452675	1.34421	ZKSCAN1,ZSCAN21,ZNF3,COPS6,MCM7,AP4M1,TAF6,CNPY4,LOC255374,LOC389541,C7orf43,GAL3ST4,GPC2,STAG3,GATS,PVRIG
4	32173883	32373883	0.384615	39	2	0.0454011	1.34293	LOC642305,PCDH7
1	199453976	199653976	0.110092	109	6	0.045412	1.34283	IGFN1,DKFZp434B1231,PKP1,TNNT2,LAD1,TNNI1
5	35716769	35916769	0.110092	109	6	0.045412	1.34283	SPEF2,IL7R
14	21173931	21373931	0.16129	62	4	0.0455505	1.34151	TRAV1-2,OR4E2,TRAV2,TRAV3,TRAV4,TRAV5,TRAV6,TRAV7,TRAV8-1,TRAV9-1,TRAV10,TRAV11
8	72395001	72595001	0.16129	62	4	0.0455505	1.34151	EYA1,LOC729649
2	203807690	204007690	0.235294	51	3	0.0456657	1.34041	CYP20A1,ABI2,RAPH1
17	40978232	41178232	0.380952	21	2	0.0457778	1.33934	LRRC37A4,LOC644157,PLEKHM1,LOC644191,MGC57346,C17orf69,LOC728762,CRHR1
17	51178232	51378232	0.232558	43	3	0.0458649	1.33852	PCTP
5	98316769	98516769	0.232558	43	3	0.0458649	1.33852	CHD1
1	55653976	55853976	0.152174	92	5	0.0459103	1.33809	LOC645538,NULL,USP24
7	65864003	66064003	0.378378	37	2	0.0461546	1.33578	RABGEF1,tcag7.967,LOC644791,LOC442326,C7orf42
3	12911759	13111759	0.15942	69	4	0.0462001	1.33536	IQSEC1
8	80795001	80995001	0.15942	69	4	0.0462001	1.33536	LOC729782,HEY1,MRPS28
11	81208219	81408219	0.232143	56	3	0.0462631	1.33477	LOC646195,PRCP
20	33539508	33739508	0.230769	52	3	0.0464622	1.3329	CEP250,LOC729591,C20orf173,ERGIC3,FER1L4,SPAG4,CPNE1,RBM12,NFS1
2	165207690	165407690	0.230769	52	3	0.0464622	1.3329	GRB14,COBLL1,LOC728184
6	114346536	114546536	0.230769	52	3	0.0464622	1.3329	FLJ34503,HDAC2,HS3ST5,LOC643954
3	100311759	100511759	0.375	32	2	0.0465314	1.33225	DCBLD2,COL8A1
4	135373883	135573883	0.375	24	2	0.0465314	1.33225	LOC132430,LOC345016
4	5973883	6173883	0.151163	86	5	0.0467898	1.32985	CRMP1,FLJ46481,JAKMIP1
14	35973931	36173931	0.15873	63	4	0.0468496	1.32929	SFTPH,NKX2-1,LOC729042,NKX2-8,FLJ42220
6	56146536	56346536	0.15873	63	4	0.0468496	1.32929	COL21A1,LOC442221
4	28373883	28573883	0.22807	57	3	0.0470596	1.32735	LOC645641,STIM2
4	170973883	171173883	0.22807	57	3	0.0470596	1.32735	LOC402192,C4orf27,MFAP3L
2	137807690	138007690	0.368421	38	2	0.047285	1.32528	THSD7B
3	88111759	88311759	0.368421	38	2	0.047285	1.32528	HTR1F,CGGBP1,LOC728397,ZNF654,C3orf38
8	129595001	129795001	0.368421	38	2	0.047285	1.32528	TMEM75,hCG_1814486
4	10373883	10573883	0.227273	44	3	0.0474579	1.32369	MIST
15	45718519	45918519	0.157895	76	4	0.0474992	1.32331	SEMA6D,LOC644029
11	14208219	14408219	0.226415	53	3	0.047657	1.32187	SPON1,RRAS2,LOC401676
14	73173931	73373931	0.226415	53	3	0.047657	1.32187	DNAL1,PNMA1,C14orf43,ZADH1
18	73023739	73223739	0.226415	53	3	0.047657	1.32187	MBP,GALR1,LOC728864
1	19453976	19653976	0.149425	87	5	0.0476693	1.32176	MRTO4,AFAR3,AKR7A3,AKR7A2,PQLC2,CAPZB,LOC644075,LOC644083
8	8195001	8395001	0.155844	77	4	0.047824	1.32035	PRAGMIN
1	239653976	239853976	0.153846	78	4	0.0481487	1.31741	FH,KMO,OPN3,CHML
20	54339508	54539508	0.153846	65	4	0.0481487	1.31741	C20orf108,AURKA,CSTF1,C20orf32,C20orf43,C20orf106
3	127711759	127911759	0.153846	65	4	0.0481487	1.31741	UROC1,CHST13,C3orf22,TR2IT1,TXNRD3,C3orf46,LOC729418,CHCHD6
3	136111759	136311759	0.153846	65	4	0.0481487	1.31741	EPHB1
5	38716769	38916769	0.153846	78	4	0.0481487	1.31741	LIFR,LOC729989,OSMR
10	100443306	100643306	0.225	40	3	0.0482543	1.31646	HPSE2
12	33036818	33236818	0.225	40	3	0.0482543	1.31646	NULL,PKP2,SYT10
2	198607690	198807690	0.225	40	3	0.0482543	1.31646	PLCL1
8	42595001	42795001	0.363636	33	2	0.0484154	1.31502	C8orf40,CHRNB3,CHRNA6,LOC727725,THAP1
6	133746536	133946536	0.148148	81	5	0.0485488	1.31382	EYA4
14	81373931	81573931	0.361111	36	2	0.0487922	1.31165	LOC730103,SEL1L
2	104607690	104807690	0.361111	36	2	0.0487922	1.31165	LOC284998,MRPS9,LOC644442,POU3F3
4	160773883	160973883	0.361111	36	2	0.0487922	1.31165	RAPGEF2
15	39518519	39718519	0.22449	49	3	0.0488517	1.31112	RTF1,ITPKA,LTK,RPAP1,TYRO3,MGA
7	115664003	115864003	0.22449	49	3	0.0488517	1.31112	TES,CAV2
11	104208219	104408219	0.222222	54	3	0.04925	1.30759	CASP12,CASP4,CASP5,CASP1
13	94913602	95113602	0.222222	45	3	0.04925	1.30759	CLDN10,DZIP1
22	29699625	29899625	0.222222	54	3	0.04925	1.30759	TUG1,MORC2,SMTN,SELM,PIB5PA,PLA2G3,RNF185
2	58207690	58407690	0.222222	45	3	0.04925	1.30759	VRK2,FANCL,hCG_15200
2	139607690	139807690	0.222222	54	3	0.04925	1.30759	LOC129560
12	21036818	21236818	0.142857	91	5	0.0494283	1.30602	LST-3TM12,SLCO1B1
16	79433586	79633586	0.142857	84	5	0.0494283	1.30602	CDYL2,C16orf61,CENPN,ATMIN
6	166146536	166346536	0.142857	84	5	0.0494283	1.30602	LOC643703,C6orf176,PDE10A,LOC441177,T
12	80836818	81036818	0.152778	72	4	0.0497727	1.30301	PPFIA2,CCDC59
15	62718519	62918519	0.36	25	2	0.0499225	1.3017	ZNF609,OAZ2,RBPMS2,PIF1,PLEKHO2
